# Supplementary material for: Complex pattern of facial remapping in somatosensory cortex following congenital but not acquired hand loss
Source: eLife. 2022 Dec 30;11:e76158. doi: 10.7554/eLife.76158 (PMC9851617; doi:10.7554/eLife.76158)
Supplement: Figure 2—source data 1. [file elife-76158-fig2-data1.docx]

| **Within Subjects Effects** | | | | | | | | | | | | | |
| --- | --- | --- | --- | --- | --- | --- | --- | --- | --- | --- | --- | --- | --- |
| **Cases** | | **Sum of Squares** | | **df** | | **Mean Square** | | **F** | | **p** | | **η²p** | |
| Hemisphere |  | 2.610 |  | 1 |  | 2.610 |  | 0.164 |  | 0.688 |  | 0.005 |  |
| Hemisphere ✻ group |  | 0.308 |  | 1 |  | 0.308 |  | 0.019 |  | 0.890 |  | 0.001 |  |
| Hemisphere ✻ brainVol |  | 3.401 |  | 1 |  | 3.401 |  | 0.214 |  | 0.646 |  | 0.006 |  |
| Residuals |  | 571.476 |  | 36 |  | 15.874 |  |  |  |  |  |  |  |
|  | | | | | | | | | | | | | |
| | **Between Subjects Effects** | | | | | | | | | | | | | | | | --- | --- | --- | --- | --- | --- | --- | --- | --- | --- | --- | --- | --- | --- | --- | | **Cases** | | **Sum of Squares** | | **df** | | **Mean Square** | | **F** | | **p** | **η²p** | | | | | Group |  | 92.0 |  | 1 |  | 92.0 |  | 2.25 |  | 0.143 |  | 0.059 |  | | BrainVol |  | 137.3 |  | 1 |  | 137.3 |  | 3.35 |  | 0.075 |  | 0.085 |  | | Residuals |  | 1474.9 |  | 36 |  | 41.0 |  |  |  |  |  |  |  | |  | | | | | | | | | | | | | | | | *Note.*  Type III Sum of Squares | | | | | | | | | | | | | | | | | | | | | | | | | | | | |

***Figure 2 – source data 1. Main effects and interaction for comparison of geodesic distances between amputees and controls for the lips.***
