# Supplementary material for: Complex pattern of facial remapping in somatosensory cortex following congenital but not acquired hand loss
Source: eLife. 2022 Dec 30;11:e76158. doi: 10.7554/eLife.76158 (PMC9851617; doi:10.7554/eLife.76158)
Supplement: Figure 2—source data 3. [file elife-76158-fig2-data3.xlsx]

## Sheet: Fig 2. - source data 3
Figure 2 - Source Data 3. Raw data for cortical geodesic distances of the lips for amputees, controls and one-handers.
ID	Group	Cortical distances in deprived hemi	Cortical distances in intact hemi	BrainVol	PLP
AD_CT01	Controls	-17.7023	-13.207	1346025	no_PLP
AD_CT02	Controls	-24.8108	-25.5191	1674738	no_PLP
AD_CT03	Controls	-27.0165	-16.7798	1681336	no_PLP
AD_CT04	Controls	-23.136	-27.481	1779403	no_PLP
AD_CT05	Controls	-31.4176	-32.2936	1615551	no_PLP
AD_CT06	Controls	-26.1594	-26.2459	1646314	no_PLP
AD_CT07	Controls	-25.8642	-29.2449	1855626	no_PLP
AD_CT08	Controls	-20.4207	-22.0658	1425268	no_PLP
AD_CT09	Controls	-19.1559	-18.5457	1290047	no_PLP
AD_CT10	Controls	-18.9114	-24.9412	1438646	no_PLP
AD_CT11	Controls	-28.2027	-29.8984	1634486	no_PLP
AD_CT12	Controls	-27.014	-31.7933	1934188	no_PLP
AD_CT13	Controls	-23.8791	-20.6653	1526851	no_PLP
AD_CT14	Controls	-25.3524	-24.817	1379533	no_PLP
AD_CT15	Controls	-25.2242	-20.384	1293328	no_PLP
AD_CT16	Controls	-30.2705	-23.7488	1424356	no_PLP
AD_CT17	Controls	-17.9553	-22.7853	1487150	no_PLP
AD_CT18	Controls	-11.2755	-14.4657	1625181	no_PLP
AD_CT19	Controls	-17.2187	-23.6408	1715272	no_PLP
AD_CT20	Controls	-16.4524	-23.1519	1517788	no_PLP
AD_CT21	Controls	-28.2926	-26.7035	1670487	no_PLP
AD_CT22	Controls	-25.2035	-25.1619	1635483	no_PLP
AD_AA01	Amputees	-26.6726	-26.8026	1855545	PLP
AD_AA02	Amputees	-24.7094	-33.8362	1796564	PLP
AD_AA03	Amputees	-22.6452	-32.7227	1466161	PLP
AD_AA04	Amputees	-21.9201	-16.8846	1629224	no_PLP
AD_AA05	Amputees	-24.7122	-25.8437	1426330	PLP
AD_AA06	Amputees	-18.2298	-19.9865	1608668	no_PLP
AD_AA08	Amputees	-20.6936	-25.1154	1387131	no_PLP
AD_AA09	Amputees	-29.2024	-25.6005	1728946	PLP
AD_AA10	Amputees	-33.2628	-23.6103	1773697	no_PLP
AD_AA11	Amputees	-14.2283	-17.2654	1758330	PLP
AD_AA12	Amputees	-33.63	-28.0166	1551382	no_PLP
AD_AA13	Amputees	-18.0293	-31.2827	1536483	PLP
AD_AA14	Amputees	-26.145	-27.5562	1624537	PLP
AD_AA16	Amputees	-39.9422	-29.6031	1575759	PLP
AD_AA17	Amputees	-27.4273	-27.6575	1593072	no_PLP
AD_AA18	Amputees	-28.7078	-33.5105	1701493	PLP
AD_AA19	Amputees	-31.6355	-24.4559	1678164	PLP
AD_CA01	One-handers	-18.146	-22.2951	1571223	no_PLP
AD_CA02	One-handers	-18.1126	-35.3694	1606427	no_PLP
AD_CA03	One-handers	-21.1477	-24.7826	1645961	no_PLP
AD_CA04	One-handers	-17.8611	-31.0334	1709485	no_PLP
AD_CA05	One-handers	-17.5222	-19.2388	1633329	no_PLP
AD_CA06	One-handers	-16.214	-19.0428	1485507	no_PLP
AD_CA07	One-handers	-16.8857	-26.952	1220039	no_PLP
AD_CA08	One-handers	-24.5104	-25.2083	1558968	no_PLP
AD_CA09	One-handers	-13.6773	-22.4856	1273945	no_PLP
AD_CA10	One-handers	-22.4972	-22.6337	1539166	no_PLP
AD_CA11	One-handers	-32.4993	-27.4802	1673941	no_PLP
AD_CA12	One-handers	-8.76508	-16.5588	1548477	no_PLP
AD_CA13	One-handers	-38.9804	-34.2064	1745471	no_PLP
AD_CA14	One-handers	-17.9965	-22.6557	1482433	no_PLP
AD_CA15	One-handers	-31.7809	-27.5624	1591122	no_PLP
AD_CA16	One-handers	-6.16384	-20.5854	1528864	no_PLP
AD_CA17	One-handers	-19.0324	-31.0334	1420124	no_PLP
AD_CA18	One-handers	-21.9027	-18.9563	1322794	no_PLP
AD_CA19	One-handers	-33.4735	-25.5679	1810667	no_PLP
AD_CA20	One-handers	-23.7254	-28.1108	1603765	no_PLP
AD_CA21	One-handers	-9.84272	-21.934	1539646	no_PLP
