# Supplementary material for: Complex pattern of facial remapping in somatosensory cortex following congenital but not acquired hand loss
Source: eLife. 2022 Dec 30;11:e76158. doi: 10.7554/eLife.76158 (PMC9851617; doi:10.7554/eLife.76158)
Supplement: Figure 2—source data 4. [file elife-76158-fig2-data4.xlsx]

## Sheet: Fig 2. - source data 4
Figure 2 - Source Data 4. Raw data for laterality indices of the lips for amputees, controls and one-handers.
ID	Group	Lips	PLP
AD_CT01	Controls	0.48312	no_PLP
AD_CT02	Controls	-0.622278	no_PLP
AD_CT03	Controls	-0.193752	no_PLP
AD_CT04	Controls	-0.484618	no_PLP
AD_CT05	Controls	-0.280241	no_PLP
AD_CT06	Controls	-0.678407	no_PLP
AD_CT07	Controls	0	no_PLP
AD_CT08	Controls	0	no_PLP
AD_CT09	Controls	0.746841	no_PLP
AD_CT10	Controls	0.638451	no_PLP
AD_CT11	Controls	-0.307195	no_PLP
AD_CT12	Controls	0	no_PLP
AD_CT13	Controls	-0.690454	no_PLP
AD_CT14	Controls	0	no_PLP
AD_CT15	Controls	0.759463	no_PLP
AD_CT16	Controls	-0.635825	no_PLP
AD_CT17	Controls	0.378813	no_PLP
AD_CT18	Controls	-0.22606	no_PLP
AD_CT19	Controls	0.670446	no_PLP
AD_CT20	Controls	-0.313985	no_PLP
AD_CT21	Controls	0.905364	no_PLP
AD_CT22	Controls	-0.315758	no_PLP
AD_AA01	Amputees	-0.442447	PLP
AD_AA02	Amputees	0.251014	PLP
AD_AA03	Amputees	0.845012	PLP
AD_AA04	Amputees	0.030972	no_PLP
AD_AA05	Amputees	-0.45994	PLP
AD_AA06	Amputees	-0.484292	no_PLP
AD_AA08	Amputees	0.884674	no_PLP
AD_AA09	Amputees	0.866944	PLP
AD_AA10	Amputees	0	no_PLP
AD_AA11	Amputees	0.402569	PLP
AD_AA12	Amputees	0.775863	no_PLP
AD_AA14	Amputees	0.16953	PLP
AD_AA13	Amputees	-0.45301	PLP
AD_AA16	Amputees	0.0177194	PLP
AD_AA17	Amputees	-0.572812	no_PLP
AD_AA18	Amputees	0.814333	PLP
AD_AA19	Amputees	0.0306765	PLP
AD_CA01	One-handers	0.609946	no_PLP
AD_CA02	One-handers	0.896887	no_PLP
AD_CA03	One-handers	0.487856	no_PLP
AD_CA04	One-handers	0.832312	no_PLP
AD_CA05	One-handers	-0.046773	no_PLP
AD_CA06	One-handers	0.164493	no_PLP
AD_CA07	One-handers	0.861247	no_PLP
AD_CA08	One-handers	0.297607	no_PLP
AD_CA09	One-handers	0.644193	no_PLP
AD_CA10	One-handers	-0.0726524	no_PLP
AD_CA11	One-handers	-0.562546	no_PLP
AD_CA12	One-handers	0.640994	no_PLP
AD_CA13	One-handers	0.689512	no_PLP
AD_CA14	One-handers	0.662303	no_PLP
AD_CA15	One-handers	0.851433	no_PLP
AD_CA16	One-handers	0.919283	no_PLP
AD_CA17	One-handers	0.974302	no_PLP
AD_CA18	One-handers	-0.941629	no_PLP
AD_CA19	One-handers	0.682309	no_PLP
AD_CA20	One-handers	-0.340272	no_PLP
AD_CA21	One-handers	0.968356	no_PLP
