# Supplementary material for: Complex pattern of facial remapping in somatosensory cortex following congenital but not acquired hand loss
Source: eLife. 2022 Dec 30;11:e76158. doi: 10.7554/eLife.76158 (PMC9851617; doi:10.7554/eLife.76158)
Supplement: Figure 3—source data 2. [file elife-76158-fig3-data2.docx]

| **Within Subjects Effects** | | | | | | | | | | | | | |
| --- | --- | --- | --- | --- | --- | --- | --- | --- | --- | --- | --- | --- | --- |
| **Cases** | | **Sum of Squares** | | **df** | | **Mean Square** | | **F** | | **p** | | **η²p** | |
| Hemisphere |  | 0.621 |  | 1 |  | 0.621 |  | 0.041 |  | 0.841 |  | 0.001 |  |
| Hemisphere ✻ group |  | 113.146 |  | 1 |  | 113.146 |  | 7.437 |  | 0.009 |  | 0.157 |  |
| Hemisphere ✻ brainVol |  | 0.796 |  | 1 |  | 0.796 |  | 0.052 |  | 0.820 |  | 0.001 |  |
| Residuals |  | 608.545 |  | 40 |  | 15.214 |  |  |  |  |  |  |  |
|  | | | | | | | | | | | | | |
| | **Between Subjects Effects** | | | | | | | | | | | | | | | --- | --- | --- | --- | --- | --- | --- | --- | --- | --- | --- | --- | --- | --- | | **Cases** | | **Sum of Squares** | | **df** | | **Mean Square** | | **F** | | **p** | **η²p** | | | | Group |  | 108.8 |  | 1 |  | 108.8 |  | 3.257 |  | 0.079 |  | 0.075 |  | | | BrainVol |  | 31.4 |  | 1 |  | 31.4 |  | 0.939 |  | 0.338 |  | 0.023 |  | | | Residuals |  | 1336.0 |  | 40 |  | 33.4 |  |  |  |  |  |  |  | | |  | | | | | | | | | | | | | | | *Note.*  Type III Sum of Squares | | | | | | | | | | | | | | | | | | | | | | | | | | | |

***Figure 3 – source data 2. Main effects and interaction for comparison of geodesic distances between one-handers and controls for the forehead.***
