# Supplementary material for: Complex pattern of facial remapping in somatosensory cortex following congenital but not acquired hand loss
Source: eLife. 2022 Dec 30;11:e76158. doi: 10.7554/eLife.76158 (PMC9851617; doi:10.7554/eLife.76158)
Supplement: Figure 3—source data 3. [file elife-76158-fig3-data3.xlsx]

## Sheet: Fig 3. - source data 3
Figure 3 - Source Data 3. Raw data for cortical geodesic distances of the forehead for amputees, controls and one-handers.
ID	Group	Cortical distance in deprived hemi	Cortical distance in intact hemi	BrainVol	PLP
AD_CT01	Controls	11.4287	8.75081	1346025	no_PLP
AD_CT02	Controls	5.00042	6.54898	1674738	no_PLP
AD_CT03	Controls	13.0878	0.431295	1681336	no_PLP
AD_CT04	Controls	10.7223	8.27283	1779403	no_PLP
AD_CT05	Controls	5.4966	9.33612	1615551	no_PLP
AD_CT06	Controls	8.52401	9.29637	1646314	no_PLP
AD_CT07	Controls	13.2641	9.55011	1855626	no_PLP
AD_CT08	Controls	12.0292	8.67072	1425268	no_PLP
AD_CT09	Controls	13.0113	11.5977	1290047	no_PLP
AD_CT10	Controls	12.0856	7.90454	1438646	no_PLP
AD_CT11	Controls	5.23088	3.45042	1634486	no_PLP
AD_CT12	Controls	4.88404	7.51559	1934188	no_PLP
AD_CT13	Controls	10.737	0.719476	1526851	no_PLP
AD_CT14	Controls	6.76753	9.74673	1379533	no_PLP
AD_CT15	Controls	9.70596	8.37476	1293328	no_PLP
AD_CT16	Controls	10.4296	11.6055	1424356	no_PLP
AD_CT17	Controls	9.785	-1.65276	1487150	no_PLP
AD_CT18	Controls	13.0738	6.60073	1625181	no_PLP
AD_CT19	Controls	5.71267	4.7836	1715272	no_PLP
AD_CT20	Controls	3.21219	1.62386	1517788	no_PLP
AD_CT21	Controls	5.8799	1.40004	1670487	no_PLP
AD_CT22	Controls	-2.81548	7.08608	1635483	no_PLP
AD_AA01	Amputees	5.16637	8.90258	1855545	PLP
AD_AA02	Amputees	-3.21219	6.14129	1796564	PLP
AD_AA03	Amputees	4.5278	6.0028	1466161	PLP
AD_AA04	Amputees	14.0946	14.9629	1629224	no_PLP
AD_AA05	Amputees	8.88748	6.80418	1426330	PLP
AD_AA06	Amputees	3.7954	-3.02262	1608668	no_PLP
AD_AA08	Amputees	10.3423	12.9582	1387131	no_PLP
AD_AA09	Amputees	1.7857	3.74024	1728946	PLP
AD_AA10	Amputees	7.34222	8.09529	1773697	no_PLP
AD_AA11	Amputees	7.27386	4.83524	1758330	PLP
AD_AA12	Amputees	11.7026	7.05803	1551382	no_PLP
AD_AA13	Amputees	10.452	7.21584	1536483	PLP
AD_AA14	Amputees	10.9095	-3.30664	1624537	PLP
AD_AA16	Amputees	-12.8982	6.28051	1575759	PLP
AD_AA17	Amputees	10.8793	11.6147	1593072	no_PLP
AD_AA18	Amputees	4.08693	4.70503	1701493	PLP
AD_AA19	Amputees	8.69189	7.75762	1678164	PLP
AD_CA01	One-handers	10.3939	-1.68067	1571223	no_PLP
AD_CA02	One-handers	-5.2756	1.98778	1606427	no_PLP
AD_CA03	One-handers	5.72136	10.8931	1645961	no_PLP
AD_CA04	One-handers	8.97916	5.7922	1709485	no_PLP
AD_CA05	One-handers	8.55706	12.0831	1633329	no_PLP
AD_CA06	One-handers	7.86617	5.19852	1485507	no_PLP
AD_CA07	One-handers	9.34557	10.7104	1220039	no_PLP
AD_CA08	One-handers	-2.44478	3.95838	1558968	no_PLP
AD_CA09	One-handers	6.84141	9.33127	1273945	no_PLP
AD_CA10	One-handers	-12.4858	1.94129	1539166	no_PLP
AD_CA11	One-handers	4.30504	9.1338	1673941	no_PLP
AD_CA12	One-handers	15.6056	13.6754	1548477	no_PLP
AD_CA13	One-handers	2.86623	4.96788	1745471	no_PLP
AD_CA14	One-handers	3.24125	8.59797	1482433	no_PLP
AD_CA15	One-handers	3.84366	7.6699	1591122	no_PLP
AD_CA16	One-handers	13.2073	7.50696	1528864	no_PLP
AD_CA17	One-handers	-9.60311	2.04182	1420124	no_PLP
AD_CA18	One-handers	8.08205	7.46783	1322794	no_PLP
AD_CA19	One-handers	5.99772	9.3528	1810667	no_PLP
AD_CA20	One-handers	1.33998	5.70077	1603765	no_PLP
AD_CA21	One-handers	-1.09604	1.43115	1539646	no_PLP
