# Supplementary material for: Complex pattern of facial remapping in somatosensory cortex following congenital but not acquired hand loss
Source: eLife. 2022 Dec 30;11:e76158. doi: 10.7554/eLife.76158 (PMC9851617; doi:10.7554/eLife.76158)
Supplement: Figure 3—source data 4. [file elife-76158-fig3-data4.xlsx]

## Sheet: Fig 3. - source data 4
Figure 3 - Source Data 4. Raw data for laterality indices of the forehead for amputees, controls and one-handers.
ID	Group	Forehead	PLP
AD_CT01	Controls	-0.0302596	no_PLP
AD_CT02	Controls	0.061904	no_PLP
AD_CT03	Controls	0.0301455	no_PLP
AD_CT04	Controls	-0.0096176	no_PLP
AD_CT05	Controls	0.0653961	no_PLP
AD_CT06	Controls	0.0106784	no_PLP
AD_CT07	Controls	0.0389584	no_PLP
AD_CT08	Controls	0.00528538	no_PLP
AD_CT09	Controls	-0.0045232	no_PLP
AD_CT10	Controls	-0.0351983	no_PLP
AD_CT11	Controls	0.0740365	no_PLP
AD_CT12	Controls	-0.026204	no_PLP
AD_CT13	Controls	0.164228	no_PLP
AD_CT14	Controls	-0.0082167	no_PLP
AD_CT15	Controls	-0.0847388	no_PLP
AD_CT16	Controls	0.00602313	no_PLP
AD_CT17	Controls	0.0652336	no_PLP
AD_CT18	Controls	0.0262223	no_PLP
AD_CT19	Controls	-0.107758	no_PLP
AD_CT20	Controls	0.259113	no_PLP
AD_CT21	Controls	-0.0137622	no_PLP
AD_CT22	Controls	0.00299616	no_PLP
AD_AA01	Amputees	0.0153105	PLP
AD_AA02	Amputees	0.0133031	PLP
AD_AA03	Amputees	-0.0520925	PLP
AD_AA04	Amputees	0.0401253	no_PLP
AD_AA05	Amputees	-0.0521305	PLP
AD_AA06	Amputees	0.0785868	no_PLP
AD_AA08	Amputees	-0.0681973	no_PLP
AD_AA09	Amputees	-0.0480661	PLP
AD_AA10	Amputees	-0.177512	no_PLP
AD_AA11	Amputees	-0.100347	PLP
AD_AA12	Amputees	-0.0168407	no_PLP
AD_AA14	Amputees	-0.0136012	PLP
AD_AA13	Amputees	-0.0102796	PLP
AD_AA16	Amputees	-0.160047	PLP
AD_AA17	Amputees	0.0574356	no_PLP
AD_AA18	Amputees	-0.0407516	PLP
AD_AA19	Amputees	0.0043416	PLP
AD_CA01	One-handers	0.00447963	no_PLP
AD_CA02	One-handers	-0.149189	no_PLP
AD_CA03	One-handers	0.0295141	no_PLP
AD_CA04	One-handers	-0.0410103	no_PLP
AD_CA05	One-handers	-0.0417567	no_PLP
AD_CA06	One-handers	-0.0226346	no_PLP
AD_CA07	One-handers	-0.0535516	no_PLP
AD_CA08	One-handers	-0.0388355	no_PLP
AD_CA09	One-handers	-0.299754	no_PLP
AD_CA10	One-handers	-0.297186	no_PLP
AD_CA11	One-handers	-0.0887031	no_PLP
AD_CA12	One-handers	-0.208176	no_PLP
AD_CA13	One-handers	-0.030853	no_PLP
AD_CA14	One-handers	-0.0466486	no_PLP
AD_CA15	One-handers	-0.0216599	no_PLP
AD_CA16	One-handers	-0.112731	no_PLP
AD_CA17	One-handers	-0.0850105	no_PLP
AD_CA18	One-handers	0.0894484	no_PLP
AD_CA19	One-handers	-0.106122	no_PLP
AD_CA20	One-handers	0.0302705	no_PLP
AD_CA21	One-handers	-0.133324	no_PLP
