# Supplementary material for: Complex pattern of facial remapping in somatosensory cortex following congenital but not acquired hand loss
Source: eLife. 2022 Dec 30;11:e76158. doi: 10.7554/eLife.76158 (PMC9851617; doi:10.7554/eLife.76158)
Supplement: Figure 4—source data 1. [file elife-76158-fig4-data1.docx]

| **Within Subjects Effects** | | | | | | | | | | | | | |
| --- | --- | --- | --- | --- | --- | --- | --- | --- | --- | --- | --- | --- | --- |
| **Cases** | | **Sum of Squares** | | **df** | | **Mean Square** | | **F** | | **p** | | **η²p** | |
| Hemisphere |  | 3.93 |  | 1 |  | 3.93 |  | 0.328 |  | 0.570 |  | 0.009 |  |
| Hemisphere ✻ group |  | 58.29 |  | 1 |  | 58.29 |  | 4.859 |  | 0.034 |  | 0.119 |  |
| Hemisphere ✻ brainVol |  | 6.59 |  | 1 |  | 6.59 |  | 0.549 |  | 0.463 |  | 0.015 |  |
| Residuals |  | 431.83 |  | 36 |  | 12.00 |  |  |  |  |  |  |  |
|  | | | | | | | | | | | | | |
| | **Between Subjects Effects** | | | | | | | | | | | | | | | --- | --- | --- | --- | --- | --- | --- | --- | --- | --- | --- | --- | --- | --- | | **Cases** | | **Sum of Squares** | | **df** | | **Mean Square** | | **F** | | **p** | | **η²p** | | | Group |  | 115 |  | 1 |  | 115 |  | 0.963 |  | 0.333 |  | 0.026 |  | | BrainVol |  | 383 |  | 1 |  | 383 |  | 3.198 |  | 0.082 |  | 0.082 |  | | Residuals |  | 4313 |  | 36 |  | 120 |  |  |  |  |  |  |  | |  | | | | | | | | | | | | | | | *Note.*  Type III Sum of Squares | | | | | | | | | | | | | | | | | | | | | | | | | | | |

***Figure 4 – source data 1. Main effects and interaction for comparison of geodesic distances between amputees and controls for the tongue.***
