# Supplementary material for: Complex pattern of facial remapping in somatosensory cortex following congenital but not acquired hand loss
Source: eLife. 2022 Dec 30;11:e76158. doi: 10.7554/eLife.76158 (PMC9851617; doi:10.7554/eLife.76158)
Supplement: Figure 4—source data 2. [file elife-76158-fig4-data2.docx]

| **Within Subjects Effects** | | | | | | | | | | | | | |
| --- | --- | --- | --- | --- | --- | --- | --- | --- | --- | --- | --- | --- | --- |
| **Cases** | | **Sum of Squares** | | **df** | | **Mean Square** | | **F** | | **p** | | **η²p** | |
| Hemisphere |  | 22.3 |  | 1 |  | 22.3 |  | 0.855 |  | 0.2361 |  | 0.021 |  |
| Hemisphere ✻ group |  | 222.9 |  | 1 |  | 222.9 |  | 8.536 |  | 0.006 |  | 0.176 |  |
| Hemisphere ✻ brainVol |  | 11.9 |  | 1 |  | 11.9 |  | 0.9455 |  | 0.504 |  | 0.011 |  |
| Residuals |  | 1044.7 |  | 40 |  | 26.1 |  |  |  |  |  |  |  |
|  | | | | | | | | | | | | | |
| | **Between Subjects Effects** | | | | | | | | | | | | | | | --- | --- | --- | --- | --- | --- | --- | --- | --- | --- | --- | --- | --- | --- | | **Cases** | | **Sum of Squares** | | **df** | | **Mean Square** | | **F** | | **p** | **η²p** | | | | Group |  | 225 |  | 1 |  | 225 |  | 2.20 |  | 0.146 |  | 0.052 |  | | | BrainVol |  | 331 |  | 1 |  | 331 |  | 3.23 |  | 0.080 |  | 0.075 |  | | | Residuals |  | 4090 |  | 40 |  | 102 |  |  |  |  |  |  |  | | |  | | | | | | | | | | | | | | | *Note.*  Type III Sum of Squares | | | | | | | | | | | | | | | | | | | | | | | | | | | |

***Figure 4 – source data 2. Main effects and interaction for comparison of geodesic distances between one-handers and controls for the tongue.***
