# Supplementary material for: Complex pattern of facial remapping in somatosensory cortex following congenital but not acquired hand loss
Source: eLife. 2022 Dec 30;11:e76158. doi: 10.7554/eLife.76158 (PMC9851617; doi:10.7554/eLife.76158)
Supplement: Figure 4—source data 3. [file elife-76158-fig4-data3.xlsx]

## Sheet: Fig 4. - source data 3
Figure 4 - Source Data 3. Raw data for cortical geodesic distances of the Tongue for amputees, controls and one-handers.
ID	Group	Cortical distance in deprived hemi	Cortical distance in intact hemi	BrainVol	PLP
AD_CT01	Controls	-29.659	-29.5548	1346025	no_PLP
AD_CT02	Controls	-42.6032	-40.6097	1674738	no_PLP
AD_CT03	Controls	-37.9108	-33.7468	1681336	no_PLP
AD_CT04	Controls	-40.9085	-43.242	1779403	no_PLP
AD_CT05	Controls	-47.0906	-47.3825	1615551	no_PLP
AD_CT06	Controls	-44.0835	-46.9072	1646314	no_PLP
AD_CT07	Controls	-29.7593	-33.5645	1855626	no_PLP
AD_CT08	Controls	-31.7143	-28.1827	1425268	no_PLP
AD_CT09	Controls	-29.3604	-26.4103	1290047	no_PLP
AD_CT10	Controls	-40.2495	-37.8302	1438646	no_PLP
AD_CT11	Controls	-23.5845	-9.26624	1634486	no_PLP
AD_CT12	Controls	-33.274	-36.1257	1934188	no_PLP
AD_CT13	Controls	-39.936	-38.8129	1526851	no_PLP
AD_CT14	Controls	-31.1193	-34.6594	1379533	no_PLP
AD_CT15	Controls	-27.5687	-32.1674	1293328	no_PLP
AD_CT16	Controls	-35.2541	-30.6153	1424356	no_PLP
AD_CT17	Controls	-37.8262	-37.3363	1487150	no_PLP
AD_CT18	Controls	-30.5807	-40.0288	1625181	no_PLP
AD_CT19	Controls	-34.1138	-38.319	1715272	no_PLP
AD_CT20	Controls	-38.4887	-30.4939	1517788	no_PLP
AD_CT21	Controls	-42.892	-42.7047	1670487	no_PLP
AD_CT22	Controls	-43.825	-42.2891	1635483	no_PLP
AD_AA01	Amputees	-37.6852	-38.2343	1855545	PLP
AD_AA02	Amputees	-44.5177	-48.5841	1796564	PLP
AD_AA03	Amputees	-32.9546	-39.773	1466161	PLP
AD_AA04	Amputees	-18.0328	-15.5824	1629224	no_PLP
AD_AA05	Amputees	-31.6419	-36.3843	1426330	PLP
AD_AA06	Amputees	-38.2882	-43.8531	1608668	no_PLP
AD_AA08	Amputees	-23.3766	-25.0086	1387131	no_PLP
AD_AA09	Amputees	-32.9009	-41.761	1728946	PLP
AD_AA10	Amputees	-16.7802	-27.7406	1773697	no_PLP
AD_AA11	Amputees	-28.0505	-34.4942	1758330	PLP
AD_AA12	Amputees	-21.5684	-26.8277	1551382	no_PLP
AD_AA13	Amputees	-35.9672	-41.9768	1536483	PLP
AD_AA14	Amputees	-41.9678	-45.7392	1624537	PLP
AD_AA16	Amputees	-24.6804	-29.794	1575759	PLP
AD_AA17	Amputees	-30.4955	-22.7587	1593072	no_PLP
AD_AA18	Amputees	-45.4903	-43.5918	1701493	PLP
AD_AA19	Amputees	-46.9297	-44.1514	1678164	PLP
AD_CA01	One-handers	-25.0303	-26.8808	1571223	no_PLP
AD_CA02	One-handers	-29.1063	-33.1213	1606427	no_PLP
AD_CA03	One-handers	-22.4223	-35.0431	1645961	no_PLP
AD_CA04	One-handers	-29.4896	-36.9139	1709485	no_PLP
AD_CA05	One-handers	-18.9817	-31.3857	1633329	no_PLP
AD_CA06	One-handers	-31.8644	-34.4429	1485507	no_PLP
AD_CA07	One-handers	-26.7657	-39.7111	1220039	no_PLP
AD_CA08	One-handers	-26.7802	-34.2714	1558968	no_PLP
AD_CA09	One-handers	-11.2055	-30.9782	1273945	no_PLP
AD_CA10	One-handers	-10.885	-28.3006	1539166	no_PLP
AD_CA11	One-handers	-25.94	-24.7609	1673941	no_PLP
AD_CA12	One-handers	-8.61294	-32.9343	1548477	no_PLP
AD_CA13	One-handers	-47.275	-51.1722	1745471	no_PLP
AD_CA14	One-handers	-41.0298	-32.008	1482433	no_PLP
AD_CA15	One-handers	-39.6545	-41.0316	1591122	no_PLP
AD_CA16	One-handers	-33.1645	-36.9695	1528864	no_PLP
AD_CA17	One-handers	-40.4262	-41.0415	1420124	no_PLP
AD_CA18	One-handers	-34.434	-36.2611	1322794	no_PLP
AD_CA19	One-handers	-46.2439	-36.5597	1810667	no_PLP
AD_CA20	One-handers	-42.1436	-39.1208	1603765	no_PLP
AD_CA21	One-handers	-20.7742	-36.3887	1539646	no_PLP
