# Supplementary material for: Complex pattern of facial remapping in somatosensory cortex following congenital but not acquired hand loss
Source: eLife. 2022 Dec 30;11:e76158. doi: 10.7554/eLife.76158 (PMC9851617; doi:10.7554/eLife.76158)
Supplement: Figure 4—source data 4. [file elife-76158-fig4-data4.xlsx]

## Sheet: Fig 4. - source data 4
Figure 4 - Source Data 4. Raw data for laterality indices of the Tongue for amputees, controls and one-handers.
ID	Group	Tongue	PLP
AD_CT01	Controls	-0.438904	no_PLP
AD_CT02	Controls	-0.947465	no_PLP
AD_CT03	Controls	0.0671241	no_PLP
AD_CT04	Controls	0.726332	no_PLP
AD_CT05	Controls	0	no_PLP
AD_CT06	Controls	0.767833	no_PLP
AD_CT07	Controls	-0.697222	no_PLP
AD_CT08	Controls	-0.19468	no_PLP
AD_CT09	Controls	0.075971	no_PLP
AD_CT10	Controls	-0.943411	no_PLP
AD_CT11	Controls	-0.216792	no_PLP
AD_CT12	Controls	0.385882	no_PLP
AD_CT13	Controls	-0.963582	no_PLP
AD_CT14	Controls	-0.24619	no_PLP
AD_CT15	Controls	0.921096	no_PLP
AD_CT16	Controls	-0.499074	no_PLP
AD_CT17	Controls	0	no_PLP
AD_CT18	Controls	0.212036	no_PLP
AD_CT19	Controls	0.00463441	no_PLP
AD_CT20	Controls	-0.321972	no_PLP
AD_CT21	Controls	-0.310322	no_PLP
AD_CT22	Controls	0	no_PLP
AD_AA01	Amputees	-0.0857734	PLP
AD_AA02	Amputees	0.880202	PLP
AD_AA03	Amputees	0.429971	PLP
AD_AA04	Amputees	0.104299	no_PLP
AD_AA05	Amputees	0.853519	PLP
AD_AA06	Amputees	0.196928	no_PLP
AD_AA08	Amputees	-0.045825	no_PLP
AD_AA09	Amputees	0.770513	PLP
AD_AA10	Amputees	0.453618	no_PLP
AD_AA11	Amputees	0.358643	PLP
AD_AA12	Amputees	0.121668	no_PLP
AD_AA14	Amputees	-0.204304	PLP
AD_AA13	Amputees	0	PLP
AD_AA16	Amputees	0.357841	PLP
AD_AA17	Amputees	-0.161443	no_PLP
AD_AA18	Amputees	0	PLP
AD_AA19	Amputees	-0.724998	PLP
AD_CA01	One-handers	-0.0366085	no_PLP
AD_CA02	One-handers	0.0286945	no_PLP
AD_CA03	One-handers	0.921224	no_PLP
AD_CA04	One-handers	0.234026	no_PLP
AD_CA05	One-handers	0.241563	no_PLP
AD_CA06	One-handers	0.942048	no_PLP
AD_CA07	One-handers	0.93355	no_PLP
AD_CA08	One-handers	0.168168	no_PLP
AD_CA09	One-handers	0.599509	no_PLP
AD_CA10	One-handers	0.617313	no_PLP
AD_CA11	One-handers	0.123417	no_PLP
AD_CA12	One-handers	0.768821	no_PLP
AD_CA13	One-handers	0.949149	no_PLP
AD_CA14	One-handers	-0.864127	no_PLP
AD_CA15	One-handers	0.868621	no_PLP
AD_CA16	One-handers	0.448087	no_PLP
AD_CA17	One-handers	0.938394	no_PLP
AD_CA18	One-handers	-0.950719	no_PLP
AD_CA19	One-handers	0	no_PLP
AD_CA20	One-handers	-0.89872	no_PLP
AD_CA21	One-handers	0.806661	no_PLP
