# Supplementary material for: Complex pattern of facial remapping in somatosensory cortex following congenital but not acquired hand loss
Source: eLife. 2022 Dec 30;11:e76158. doi: 10.7554/eLife.76158 (PMC9851617; doi:10.7554/eLife.76158)
Supplement: Figure 5—source data 2. [file elife-76158-fig5-data2.xlsx]

## Sheet: Fig 5. - source data 2
Figure 5 - Source Data 2. Jaccard similarity values of amputees' maps relative to the ones of one-handers and controls
ID	Group	Age	Hemisphere	Move	Similarity value
AD_AA01	AA->CT	60	Deprived	Forehead	0.405577
AD_AA01	AA->CT	60	Intact	Forehead	0.393007
AD_AA01	AA->CT	60	Deprived	Nose	0.0450266
AD_AA01	AA->CT	60	Intact	Nose	0.0408702
AD_AA01	AA->CT	60	Deprived	Lips	0.110331
AD_AA01	AA->CT	60	Intact	Lips	0.11436
AD_AA01	AA->CT	60	Deprived	Tongue	0.188577
AD_AA01	AA->CT	60	Intact	Tongue	0.19298
AD_AA02	AA->CT	34	Deprived	Forehead	0.428299
AD_AA02	AA->CT	34	Intact	Forehead	0.394791
AD_AA02	AA->CT	34	Deprived	Nose	0.0459902
AD_AA02	AA->CT	34	Intact	Nose	0.0463554
AD_AA02	AA->CT	34	Deprived	Lips	0.219898
AD_AA02	AA->CT	34	Intact	Lips	0.155687
AD_AA02	AA->CT	34	Deprived	Tongue	0.224608
AD_AA02	AA->CT	34	Intact	Tongue	0.134041
AD_AA03	AA->CT	58	Deprived	Forehead	0.410284
AD_AA03	AA->CT	58	Intact	Forehead	0.413099
AD_AA03	AA->CT	58	Deprived	Nose	0.0476387
AD_AA03	AA->CT	58	Intact	Nose	0.0547376
AD_AA03	AA->CT	58	Deprived	Lips	0.172511
AD_AA03	AA->CT	58	Intact	Lips	0.131542
AD_AA03	AA->CT	58	Deprived	Tongue	0.163381
AD_AA03	AA->CT	58	Intact	Tongue	0.183486
AD_AA04	AA->CT	59	Deprived	Forehead	0.364075
AD_AA04	AA->CT	59	Intact	Forehead	0.375623
AD_AA04	AA->CT	59	Deprived	Nose	0.0335191
AD_AA04	AA->CT	59	Intact	Nose	0.0446694
AD_AA04	AA->CT	59	Deprived	Lips	0.157561
AD_AA04	AA->CT	59	Intact	Lips	0.0938327
AD_AA04	AA->CT	59	Deprived	Tongue	0.151192
AD_AA04	AA->CT	59	Intact	Tongue	0.24792
AD_AA05	AA->CT	54	Deprived	Forehead	0.603783
AD_AA05	AA->CT	54	Intact	Forehead	0.579619
AD_AA05	AA->CT	54	Deprived	Nose	0.0155741
AD_AA05	AA->CT	54	Intact	Nose	0.0242041
AD_AA05	AA->CT	54	Deprived	Lips	0.260767
AD_AA05	AA->CT	54	Intact	Lips	0.0868148
AD_AA05	AA->CT	54	Deprived	Tongue	0.241028
AD_AA05	AA->CT	54	Intact	Tongue	0.306572
AD_AA06	AA->CT	47	Deprived	Forehead	0.667632
AD_AA06	AA->CT	47	Intact	Forehead	0.616188
AD_AA06	AA->CT	47	Deprived	Nose	0.024359
AD_AA06	AA->CT	47	Intact	Nose	0.0906253
AD_AA06	AA->CT	47	Deprived	Lips	0.286111
AD_AA06	AA->CT	47	Intact	Lips	0.135431
AD_AA06	AA->CT	47	Deprived	Tongue	0.376636
AD_AA06	AA->CT	47	Intact	Tongue	0.19895
AD_AA08	AA->CT	40	Deprived	Forehead	0.425276
AD_AA08	AA->CT	40	Intact	Forehead	0.374141
AD_AA08	AA->CT	40	Deprived	Nose	0.0340909
AD_AA08	AA->CT	40	Intact	Nose	0.0284091
AD_AA08	AA->CT	40	Deprived	Lips	0.163518
AD_AA08	AA->CT	40	Intact	Lips	0.158291
AD_AA08	AA->CT	40	Deprived	Tongue	0.197727
AD_AA08	AA->CT	40	Intact	Tongue	0.180798
AD_AA09	AA->CT	47	Deprived	Forehead	0.396306
AD_AA09	AA->CT	47	Intact	Forehead	0.381888
AD_AA09	AA->CT	47	Deprived	Nose	0.045906
AD_AA09	AA->CT	47	Intact	Nose	0.0332605
AD_AA09	AA->CT	47	Deprived	Lips	0.131001
AD_AA09	AA->CT	47	Intact	Lips	0.157508
AD_AA09	AA->CT	47	Deprived	Tongue	0.12432
AD_AA09	AA->CT	47	Intact	Tongue	0.112725
AD_AA10	AA->CT	53	Deprived	Forehead	0.516216
AD_AA10	AA->CT	53	Intact	Forehead	0.603735
AD_AA10	AA->CT	53	Deprived	Nose	0.0155265
AD_AA10	AA->CT	53	Intact	Nose	0.0155265
AD_AA10	AA->CT	53	Deprived	Lips	0.0988987
AD_AA10	AA->CT	53	Intact	Lips	0.032661
AD_AA10	AA->CT	53	Deprived	Tongue	0.285664
AD_AA10	AA->CT	53	Intact	Tongue	0.319256
AD_AA11	AA->CT	56	Deprived	Forehead	0.556853
AD_AA11	AA->CT	56	Intact	Forehead	0.538274
AD_AA11	AA->CT	56	Deprived	Nose	0.0141556
AD_AA11	AA->CT	56	Intact	Nose	0.012293
AD_AA11	AA->CT	56	Deprived	Lips	0.224665
AD_AA11	AA->CT	56	Intact	Lips	0.0742567
AD_AA11	AA->CT	56	Deprived	Tongue	0.338399
AD_AA11	AA->CT	56	Intact	Tongue	0.272091
AD_AA12	AA->CT	66	Deprived	Forehead	0.414533
AD_AA12	AA->CT	66	Intact	Forehead	0.394971
AD_AA12	AA->CT	66	Deprived	Nose	0.0510841
AD_AA12	AA->CT	66	Intact	Nose	0.0414606
AD_AA12	AA->CT	66	Deprived	Lips	0.170096
AD_AA12	AA->CT	66	Intact	Lips	0.115705
AD_AA12	AA->CT	66	Deprived	Tongue	0.175241
AD_AA12	AA->CT	66	Intact	Tongue	0.163289
AD_AA13	AA->CT	65	Deprived	Forehead	0.606869
AD_AA13	AA->CT	65	Intact	Forehead	0.564666
AD_AA13	AA->CT	65	Deprived	Nose	0.0176632
AD_AA13	AA->CT	65	Intact	Nose	0.0186355
AD_AA13	AA->CT	65	Deprived	Lips	0.232634
AD_AA13	AA->CT	65	Intact	Lips	0.055881
AD_AA13	AA->CT	65	Deprived	Tongue	0.386372
AD_AA13	AA->CT	65	Intact	Tongue	0.261852
AD_AA14	AA->CT	66	Deprived	Forehead	0.634103
AD_AA14	AA->CT	66	Intact	Forehead	0.615537
AD_AA14	AA->CT	66	Deprived	Nose	0.0208023
AD_AA14	AA->CT	66	Intact	Nose	0.0263454
AD_AA14	AA->CT	66	Deprived	Lips	0.31832
AD_AA14	AA->CT	66	Intact	Lips	0.153581
AD_AA14	AA->CT	66	Deprived	Tongue	0.276031
AD_AA14	AA->CT	66	Intact	Tongue	0.202813
AD_AA16	AA->CT	64	Deprived	Forehead	0.357902
AD_AA16	AA->CT	64	Intact	Forehead	0.392472
AD_AA16	AA->CT	64	Deprived	Nose	0.0492243
AD_AA16	AA->CT	64	Intact	Nose	0.059264
AD_AA16	AA->CT	64	Deprived	Lips	0.0527149
AD_AA16	AA->CT	64	Intact	Lips	0.115506
AD_AA16	AA->CT	64	Deprived	Tongue	0.0993745
AD_AA16	AA->CT	64	Intact	Tongue	0.16185
AD_AA17	AA->CT	65	Deprived	Forehead	0.439781
AD_AA17	AA->CT	65	Intact	Forehead	0.404617
AD_AA17	AA->CT	65	Deprived	Nose	0.0318921
AD_AA17	AA->CT	65	Intact	Nose	0.0351389
AD_AA17	AA->CT	65	Deprived	Lips	0.188254
AD_AA17	AA->CT	65	Intact	Lips	0.16081
AD_AA17	AA->CT	65	Deprived	Tongue	0.100194
AD_AA17	AA->CT	65	Intact	Tongue	0.0666101
AD_AA18	AA->CT	48	Deprived	Forehead	0.428187
AD_AA18	AA->CT	48	Intact	Forehead	0.396281
AD_AA18	AA->CT	48	Deprived	Nose	0.059706
AD_AA18	AA->CT	48	Intact	Nose	0.065812
AD_AA18	AA->CT	48	Deprived	Lips	0.177653
AD_AA18	AA->CT	48	Intact	Lips	0.148544
AD_AA18	AA->CT	48	Deprived	Tongue	0.195355
AD_AA18	AA->CT	48	Intact	Tongue	0.142653
AD_AA19	AA->CT	31	Deprived	Forehead	0.66783
AD_AA19	AA->CT	31	Intact	Forehead	0.629288
AD_AA19	AA->CT	31	Deprived	Nose	0.0246989
AD_AA19	AA->CT	31	Intact	Nose	0.0169117
AD_AA19	AA->CT	31	Deprived	Lips	0.316555
AD_AA19	AA->CT	31	Intact	Lips	0.151434
AD_AA19	AA->CT	31	Deprived	Tongue	0.338051
AD_AA19	AA->CT	31	Intact	Tongue	0.237454
AD_AA01	AA->CA	60	Deprived	Forehead	0.369384
AD_AA01	AA->CA	60	Intact	Forehead	0.440262
AD_AA01	AA->CA	60	Deprived	Nose	0.0487684
AD_AA01	AA->CA	60	Intact	Nose	0.0465232
AD_AA01	AA->CA	60	Deprived	Lips	0.0780892
AD_AA01	AA->CA	60	Intact	Lips	0.120887
AD_AA01	AA->CA	60	Deprived	Tongue	0.226143
AD_AA01	AA->CA	60	Intact	Tongue	0.237119
AD_AA02	AA->CA	34	Deprived	Forehead	0.423501
AD_AA02	AA->CA	34	Intact	Forehead	0.462845
AD_AA02	AA->CA	34	Deprived	Nose	0.051088
AD_AA02	AA->CA	34	Intact	Nose	0.04788
AD_AA02	AA->CA	34	Deprived	Lips	0.177982
AD_AA02	AA->CA	34	Intact	Lips	0.165302
AD_AA02	AA->CA	34	Deprived	Tongue	0.252097
AD_AA02	AA->CA	34	Intact	Tongue	0.181657
AD_AA03	AA->CA	58	Deprived	Forehead	0.389368
AD_AA03	AA->CA	58	Intact	Forehead	0.46413
AD_AA03	AA->CA	58	Deprived	Nose	0.0527303
AD_AA03	AA->CA	58	Intact	Nose	0.0620871
AD_AA03	AA->CA	58	Deprived	Lips	0.137093
AD_AA03	AA->CA	58	Intact	Lips	0.157737
AD_AA03	AA->CA	58	Deprived	Tongue	0.186162
AD_AA03	AA->CA	58	Intact	Tongue	0.218842
AD_AA04	AA->CA	59	Deprived	Forehead	0.286202
AD_AA04	AA->CA	59	Intact	Forehead	0.335275
AD_AA04	AA->CA	59	Deprived	Nose	0.0308067
AD_AA04	AA->CA	59	Intact	Nose	0.0363978
AD_AA04	AA->CA	59	Deprived	Lips	0.0971606
AD_AA04	AA->CA	59	Intact	Lips	0.0800475
AD_AA04	AA->CA	59	Deprived	Tongue	0.141854
AD_AA04	AA->CA	59	Intact	Tongue	0.197859
AD_AA05	AA->CA	54	Deprived	Forehead	0.449755
AD_AA05	AA->CA	54	Intact	Forehead	0.545248
AD_AA05	AA->CA	54	Deprived	Nose	0.0228116
AD_AA05	AA->CA	54	Intact	Nose	0.0309214
AD_AA05	AA->CA	54	Deprived	Lips	0.155369
AD_AA05	AA->CA	54	Intact	Lips	0.0841623
AD_AA05	AA->CA	54	Deprived	Tongue	0.18894
AD_AA05	AA->CA	54	Intact	Tongue	0.250076
AD_AA06	AA->CA	47	Deprived	Forehead	0.49975
AD_AA06	AA->CA	47	Intact	Forehead	0.561342
AD_AA06	AA->CA	47	Deprived	Nose	0.0247317
AD_AA06	AA->CA	47	Intact	Nose	0.0685449
AD_AA06	AA->CA	47	Deprived	Lips	0.201717
AD_AA06	AA->CA	47	Intact	Lips	0.108472
AD_AA06	AA->CA	47	Deprived	Tongue	0.292662
AD_AA06	AA->CA	47	Intact	Tongue	0.160124
AD_AA08	AA->CA	40	Deprived	Forehead	0.400733
AD_AA08	AA->CA	40	Intact	Forehead	0.428553
AD_AA08	AA->CA	40	Deprived	Nose	0.0348095
AD_AA08	AA->CA	40	Intact	Nose	0.0363986
AD_AA08	AA->CA	40	Deprived	Lips	0.138623
AD_AA08	AA->CA	40	Intact	Lips	0.198128
AD_AA08	AA->CA	40	Deprived	Tongue	0.222712
AD_AA08	AA->CA	40	Intact	Tongue	0.197342
AD_AA09	AA->CA	47	Deprived	Forehead	0.39089
AD_AA09	AA->CA	47	Intact	Forehead	0.439383
AD_AA09	AA->CA	47	Deprived	Nose	0.0494236
AD_AA09	AA->CA	47	Intact	Nose	0.0449363
AD_AA09	AA->CA	47	Deprived	Lips	0.105515
AD_AA09	AA->CA	47	Intact	Lips	0.165402
AD_AA09	AA->CA	47	Deprived	Tongue	0.142809
AD_AA09	AA->CA	47	Intact	Tongue	0.167213
AD_AA10	AA->CA	53	Deprived	Forehead	0.404514
AD_AA10	AA->CA	53	Intact	Forehead	0.553228
AD_AA10	AA->CA	53	Deprived	Nose	0.0200134
AD_AA10	AA->CA	53	Intact	Nose	0.0200134
AD_AA10	AA->CA	53	Deprived	Lips	0.0625658
AD_AA10	AA->CA	53	Intact	Lips	0.029338
AD_AA10	AA->CA	53	Deprived	Tongue	0.272074
AD_AA10	AA->CA	53	Intact	Tongue	0.252438
AD_AA11	AA->CA	56	Deprived	Forehead	0.427204
AD_AA11	AA->CA	56	Intact	Forehead	0.481505
AD_AA11	AA->CA	56	Deprived	Nose	0.0183813
AD_AA11	AA->CA	56	Intact	Nose	0.018454
AD_AA11	AA->CA	56	Deprived	Lips	0.152155
AD_AA11	AA->CA	56	Intact	Lips	0.037671
AD_AA11	AA->CA	56	Deprived	Tongue	0.29377
AD_AA11	AA->CA	56	Intact	Tongue	0.207558
AD_AA12	AA->CA	66	Deprived	Forehead	0.386819
AD_AA12	AA->CA	66	Intact	Forehead	0.44895
AD_AA12	AA->CA	66	Deprived	Nose	0.0487934
AD_AA12	AA->CA	66	Intact	Nose	0.0461526
AD_AA12	AA->CA	66	Deprived	Lips	0.136097
AD_AA12	AA->CA	66	Intact	Lips	0.124997
AD_AA12	AA->CA	66	Deprived	Tongue	0.192596
AD_AA12	AA->CA	66	Intact	Tongue	0.166119
AD_AA13	AA->CA	65	Deprived	Forehead	0.469129
AD_AA13	AA->CA	65	Intact	Forehead	0.509317
AD_AA13	AA->CA	65	Deprived	Nose	0.0173285
AD_AA13	AA->CA	65	Intact	Nose	0.0194667
AD_AA13	AA->CA	65	Deprived	Lips	0.167672
AD_AA13	AA->CA	65	Intact	Lips	0.0519461
AD_AA13	AA->CA	65	Deprived	Tongue	0.32059
AD_AA13	AA->CA	65	Intact	Tongue	0.205172
AD_AA14	AA->CA	66	Deprived	Forehead	0.475138
AD_AA14	AA->CA	66	Intact	Forehead	0.55933
AD_AA14	AA->CA	66	Deprived	Nose	0.0260353
AD_AA14	AA->CA	66	Intact	Nose	0.0271945
AD_AA14	AA->CA	66	Deprived	Lips	0.192143
AD_AA14	AA->CA	66	Intact	Lips	0.147841
AD_AA14	AA->CA	66	Deprived	Tongue	0.191424
AD_AA14	AA->CA	66	Intact	Tongue	0.172171
AD_AA16	AA->CA	64	Deprived	Forehead	0.32712
AD_AA16	AA->CA	64	Intact	Forehead	0.448876
AD_AA16	AA->CA	64	Deprived	Nose	0.0497081
AD_AA16	AA->CA	64	Intact	Nose	0.0514116
AD_AA16	AA->CA	64	Deprived	Lips	0.0382384
AD_AA16	AA->CA	64	Intact	Lips	0.104089
AD_AA16	AA->CA	64	Deprived	Tongue	0.121794
AD_AA16	AA->CA	64	Intact	Tongue	0.177512
AD_AA17	AA->CA	65	Deprived	Forehead	0.415654
AD_AA17	AA->CA	65	Intact	Forehead	0.455257
AD_AA17	AA->CA	65	Deprived	Nose	0.048854
AD_AA17	AA->CA	65	Intact	Nose	0.0480042
AD_AA17	AA->CA	65	Deprived	Lips	0.131147
AD_AA17	AA->CA	65	Intact	Lips	0.159672
AD_AA17	AA->CA	65	Deprived	Tongue	0.117664
AD_AA17	AA->CA	65	Intact	Tongue	0.0844134
AD_AA18	AA->CA	48	Deprived	Forehead	0.413465
AD_AA18	AA->CA	48	Intact	Forehead	0.459566
AD_AA18	AA->CA	48	Deprived	Nose	0.0635347
AD_AA18	AA->CA	48	Intact	Nose	0.0578115
AD_AA18	AA->CA	48	Deprived	Lips	0.161209
AD_AA18	AA->CA	48	Intact	Lips	0.18755
AD_AA18	AA->CA	48	Deprived	Tongue	0.221175
AD_AA18	AA->CA	48	Intact	Tongue	0.193181
AD_AA19	AA->CA	31	Deprived	Forehead	0.490024
AD_AA19	AA->CA	31	Intact	Forehead	0.578282
AD_AA19	AA->CA	31	Deprived	Nose	0.0169226
AD_AA19	AA->CA	31	Intact	Nose	0.0169335
AD_AA19	AA->CA	31	Deprived	Lips	0.187376
AD_AA19	AA->CA	31	Intact	Lips	0.150364
AD_AA19	AA->CA	31	Deprived	Tongue	0.231206
AD_AA19	AA->CA	31	Intact	Tongue	0.177619
