# Supplementary material for: Complex pattern of facial remapping in somatosensory cortex following congenital but not acquired hand loss
Source: eLife. 2022 Dec 30;11:e76158. doi: 10.7554/eLife.76158 (PMC9851617; doi:10.7554/eLife.76158)
Supplement: Figure 6—source data 3. [file elife-76158-fig6-data3.xlsx]

## Sheet: Fig 6. - source data 3
Figure 6 - Source Data 3. Multivariate distances for face-face pairs in the hand region-of-interest for amputees, one-handers and controls.
ID	Group	Age	Hemisphere	FacePairs	HandROI_Distances
AD_AA01	Amputees	60	Intact	1	0.22764
AD_AA01	Amputees	60	Intact	2	0.203931
AD_AA01	Amputees	60	Intact	3	0.291496
AD_AA01	Amputees	60	Intact	4	0.249673
AD_AA01	Amputees	60	Intact	5	0.343219
AD_AA01	Amputees	60	Intact	6	-0.0502745
AD_AA02	Amputees	34	Intact	1	0.140174
AD_AA02	Amputees	34	Intact	2	0.0898764
AD_AA02	Amputees	34	Intact	3	0.0896367
AD_AA02	Amputees	34	Intact	4	0.0548267
AD_AA02	Amputees	34	Intact	5	0.222619
AD_AA02	Amputees	34	Intact	6	0.0966493
AD_AA03	Amputees	58	Intact	1	0.0768964
AD_AA03	Amputees	58	Intact	2	0.247848
AD_AA03	Amputees	58	Intact	3	0.207121
AD_AA03	Amputees	58	Intact	4	0.11076
AD_AA03	Amputees	58	Intact	5	0.139756
AD_AA03	Amputees	58	Intact	6	0.12174
AD_AA04	Amputees	59	Intact	1	0.19589
AD_AA04	Amputees	59	Intact	2	0.302803
AD_AA04	Amputees	59	Intact	3	0.276166
AD_AA04	Amputees	59	Intact	4	0.260942
AD_AA04	Amputees	59	Intact	5	0.220616
AD_AA04	Amputees	59	Intact	6	0.224713
AD_AA05	Amputees	54	Intact	1	0.0763327
AD_AA05	Amputees	54	Intact	2	0.119718
AD_AA05	Amputees	54	Intact	3	0.200056
AD_AA05	Amputees	54	Intact	4	0.0332428
AD_AA05	Amputees	54	Intact	5	0.102944
AD_AA05	Amputees	54	Intact	6	0.113174
AD_AA06	Amputees	47	Intact	1	0.233563
AD_AA06	Amputees	47	Intact	2	0.227451
AD_AA06	Amputees	47	Intact	3	0.180682
AD_AA06	Amputees	47	Intact	4	0.223102
AD_AA06	Amputees	47	Intact	5	0.113076
AD_AA06	Amputees	47	Intact	6	0.186237
AD_AA08	Amputees	40	Intact	1	0.152529
AD_AA08	Amputees	40	Intact	2	0.220703
AD_AA08	Amputees	40	Intact	3	0.153912
AD_AA08	Amputees	40	Intact	4	0.159551
AD_AA08	Amputees	40	Intact	5	0.194401
AD_AA08	Amputees	40	Intact	6	0.151441
AD_AA09	Amputees	47	Intact	1	-0.0896703
AD_AA09	Amputees	47	Intact	2	0.192488
AD_AA09	Amputees	47	Intact	3	-0.184147
AD_AA09	Amputees	47	Intact	4	0.220804
AD_AA09	Amputees	47	Intact	5	-0.0599695
AD_AA09	Amputees	47	Intact	6	-0.0781811
AD_AA10	Amputees	53	Intact	1	0.108266
AD_AA10	Amputees	53	Intact	2	0.217369
AD_AA10	Amputees	53	Intact	3	0.298618
AD_AA10	Amputees	53	Intact	4	0.0315838
AD_AA10	Amputees	53	Intact	5	0.272574
AD_AA10	Amputees	53	Intact	6	0.205545
AD_AA11	Amputees	56	Intact	1	0.110104
AD_AA11	Amputees	56	Intact	2	0.105957
AD_AA11	Amputees	56	Intact	3	0.125391
AD_AA11	Amputees	56	Intact	4	-0.110054
AD_AA11	Amputees	56	Intact	5	0.224287
AD_AA11	Amputees	56	Intact	6	0.131594
AD_AA12	Amputees	66	Intact	1	0.337339
AD_AA12	Amputees	66	Intact	2	0.368848
AD_AA12	Amputees	66	Intact	3	0.427045
AD_AA12	Amputees	66	Intact	4	0.223309
AD_AA12	Amputees	66	Intact	5	0.20635
AD_AA12	Amputees	66	Intact	6	0.325654
AD_AA13	Amputees	65	Intact	1	0.137533
AD_AA13	Amputees	65	Intact	2	0.17371
AD_AA13	Amputees	65	Intact	3	0.335757
AD_AA13	Amputees	65	Intact	4	0.223617
AD_AA13	Amputees	65	Intact	5	0.30784
AD_AA13	Amputees	65	Intact	6	0.193642
AD_AA14	Amputees	66	Intact	1	0.0956362
AD_AA14	Amputees	66	Intact	2	0.179115
AD_AA14	Amputees	66	Intact	3	-0.0672111
AD_AA14	Amputees	66	Intact	4	0.227094
AD_AA14	Amputees	66	Intact	5	0.227802
AD_AA14	Amputees	66	Intact	6	0.146979
AD_AA16	Amputees	64	Intact	1	0.0711129
AD_AA16	Amputees	64	Intact	2	0.210998
AD_AA16	Amputees	64	Intact	3	0.15824
AD_AA16	Amputees	64	Intact	4	0.290749
AD_AA16	Amputees	64	Intact	5	0.163565
AD_AA16	Amputees	64	Intact	6	0.165563
AD_AA17	Amputees	65	Intact	1	0.085882
AD_AA17	Amputees	65	Intact	2	0.300148
AD_AA17	Amputees	65	Intact	3	0.25598
AD_AA17	Amputees	65	Intact	4	0.136509
AD_AA17	Amputees	65	Intact	5	0.15059
AD_AA17	Amputees	65	Intact	6	0.159626
AD_AA18	Amputees	48	Intact	1	0.152011
AD_AA18	Amputees	48	Intact	2	0.135223
AD_AA18	Amputees	48	Intact	3	0.116392
AD_AA18	Amputees	48	Intact	4	0.0950414
AD_AA18	Amputees	48	Intact	5	-0.116557
AD_AA18	Amputees	48	Intact	6	0.118946
AD_AA19	Amputees	31	Intact	1	-0.221172
AD_AA19	Amputees	31	Intact	2	0.0562121
AD_AA19	Amputees	31	Intact	3	-0.15241
AD_AA19	Amputees	31	Intact	4	-0.142827
AD_AA19	Amputees	31	Intact	5	0.0954279
AD_AA19	Amputees	31	Intact	6	-0.0361666
AD_AA01	Amputees	60	Deprived	1	0.181932
AD_AA01	Amputees	60	Deprived	2	0.22539
AD_AA01	Amputees	60	Deprived	3	0.134736
AD_AA01	Amputees	60	Deprived	4	0.20808
AD_AA01	Amputees	60	Deprived	5	0.205532
AD_AA01	Amputees	60	Deprived	6	-0.11144
AD_AA02	Amputees	34	Deprived	1	0.146877
AD_AA02	Amputees	34	Deprived	2	0.291747
AD_AA02	Amputees	34	Deprived	3	0.286218
AD_AA02	Amputees	34	Deprived	4	0.234131
AD_AA02	Amputees	34	Deprived	5	0.274023
AD_AA02	Amputees	34	Deprived	6	0.175706
AD_AA03	Amputees	58	Deprived	1	0.178349
AD_AA03	Amputees	58	Deprived	2	0.274669
AD_AA03	Amputees	58	Deprived	3	0.247412
AD_AA03	Amputees	58	Deprived	4	0.17883
AD_AA03	Amputees	58	Deprived	5	0.189859
AD_AA03	Amputees	58	Deprived	6	0.211767
AD_AA04	Amputees	59	Deprived	1	0.383643
AD_AA04	Amputees	59	Deprived	2	0.345996
AD_AA04	Amputees	59	Deprived	3	0.402907
AD_AA04	Amputees	59	Deprived	4	0.251097
AD_AA04	Amputees	59	Deprived	5	0.232778
AD_AA04	Amputees	59	Deprived	6	0.275206
AD_AA05	Amputees	54	Deprived	1	0.165913
AD_AA05	Amputees	54	Deprived	2	0.293512
AD_AA05	Amputees	54	Deprived	3	0.321887
AD_AA05	Amputees	54	Deprived	4	0.174643
AD_AA05	Amputees	54	Deprived	5	0.276873
AD_AA05	Amputees	54	Deprived	6	0.217078
AD_AA06	Amputees	47	Deprived	1	0.246297
AD_AA06	Amputees	47	Deprived	2	0.337619
AD_AA06	Amputees	47	Deprived	3	0.206332
AD_AA06	Amputees	47	Deprived	4	0.372917
AD_AA06	Amputees	47	Deprived	5	0.215849
AD_AA06	Amputees	47	Deprived	6	0.305774
AD_AA08	Amputees	40	Deprived	1	0.16782
AD_AA08	Amputees	40	Deprived	2	0.314934
AD_AA08	Amputees	40	Deprived	3	0.467863
AD_AA08	Amputees	40	Deprived	4	0.18416
AD_AA08	Amputees	40	Deprived	5	0.461229
AD_AA08	Amputees	40	Deprived	6	0.436691
AD_AA09	Amputees	47	Deprived	1	0.100348
AD_AA09	Amputees	47	Deprived	2	0.231092
AD_AA09	Amputees	47	Deprived	3	0.248979
AD_AA09	Amputees	47	Deprived	4	0.240975
AD_AA09	Amputees	47	Deprived	5	0.240305
AD_AA09	Amputees	47	Deprived	6	0.170028
AD_AA10	Amputees	53	Deprived	1	0.229004
AD_AA10	Amputees	53	Deprived	2	0.193797
AD_AA10	Amputees	53	Deprived	3	0.278718
AD_AA10	Amputees	53	Deprived	4	-0.0577696
AD_AA10	Amputees	53	Deprived	5	0.201827
AD_AA10	Amputees	53	Deprived	6	0.227586
AD_AA11	Amputees	56	Deprived	1	-0.169174
AD_AA11	Amputees	56	Deprived	2	0.153858
AD_AA11	Amputees	56	Deprived	3	0.379768
AD_AA11	Amputees	56	Deprived	4	0.197451
AD_AA11	Amputees	56	Deprived	5	0.371822
AD_AA11	Amputees	56	Deprived	6	0.235075
AD_AA12	Amputees	66	Deprived	1	0.314983
AD_AA12	Amputees	66	Deprived	2	0.328238
AD_AA12	Amputees	66	Deprived	3	0.436508
AD_AA12	Amputees	66	Deprived	4	0.124961
AD_AA12	Amputees	66	Deprived	5	0.287977
AD_AA12	Amputees	66	Deprived	6	0.240175
AD_AA13	Amputees	65	Deprived	1	0.101472
AD_AA13	Amputees	65	Deprived	2	0.213096
AD_AA13	Amputees	65	Deprived	3	0.219644
AD_AA13	Amputees	65	Deprived	4	0.275996
AD_AA13	Amputees	65	Deprived	5	0.256957
AD_AA13	Amputees	65	Deprived	6	0.144602
AD_AA14	Amputees	66	Deprived	1	0.119008
AD_AA14	Amputees	66	Deprived	2	0.166588
AD_AA14	Amputees	66	Deprived	3	0.181843
AD_AA14	Amputees	66	Deprived	4	0.0736181
AD_AA14	Amputees	66	Deprived	5	0.189583
AD_AA14	Amputees	66	Deprived	6	-0.0812181
AD_AA16	Amputees	64	Deprived	1	0.214145
AD_AA16	Amputees	64	Deprived	2	0.271532
AD_AA16	Amputees	64	Deprived	3	0.277813
AD_AA16	Amputees	64	Deprived	4	0.229885
AD_AA16	Amputees	64	Deprived	5	0.187537
AD_AA16	Amputees	64	Deprived	6	0.190933
AD_AA17	Amputees	65	Deprived	1	0.0848125
AD_AA17	Amputees	65	Deprived	2	0.151367
AD_AA17	Amputees	65	Deprived	3	0.170047
AD_AA17	Amputees	65	Deprived	4	0.129839
AD_AA17	Amputees	65	Deprived	5	0.174162
AD_AA17	Amputees	65	Deprived	6	-0.0246009
AD_AA18	Amputees	48	Deprived	1	0.226637
AD_AA18	Amputees	48	Deprived	2	0.130079
AD_AA18	Amputees	48	Deprived	3	0.173274
AD_AA18	Amputees	48	Deprived	4	0.17454
AD_AA18	Amputees	48	Deprived	5	0.228901
AD_AA18	Amputees	48	Deprived	6	0.0335579
AD_AA19	Amputees	31	Deprived	1	0.175893
AD_AA19	Amputees	31	Deprived	2	0.138878
AD_AA19	Amputees	31	Deprived	3	0.160243
AD_AA19	Amputees	31	Deprived	4	0.125738
AD_AA19	Amputees	31	Deprived	5	0.0683103
AD_AA19	Amputees	31	Deprived	6	0.122072
AD_CA01	One-handers	32	Intact	1	0.231218
AD_CA01	One-handers	32	Intact	2	0.316641
AD_CA01	One-handers	32	Intact	3	0.522532
AD_CA01	One-handers	32	Intact	4	0.326278
AD_CA01	One-handers	32	Intact	5	0.459313
AD_CA01	One-handers	32	Intact	6	0.314784
AD_CA02	One-handers	32	Intact	1	0.244926
AD_CA02	One-handers	32	Intact	2	0.346024
AD_CA02	One-handers	32	Intact	3	0.324367
AD_CA02	One-handers	32	Intact	4	0.299826
AD_CA02	One-handers	32	Intact	5	0.165912
AD_CA02	One-handers	32	Intact	6	0.177179
AD_CA03	One-handers	35	Intact	1	0.259331
AD_CA03	One-handers	35	Intact	2	0.317363
AD_CA03	One-handers	35	Intact	3	0.184415
AD_CA03	One-handers	35	Intact	4	0.121276
AD_CA03	One-handers	35	Intact	5	0.176875
AD_CA03	One-handers	35	Intact	6	0.158751
AD_CA04	One-handers	48	Intact	1	0.282629
AD_CA04	One-handers	48	Intact	2	0.416931
AD_CA04	One-handers	48	Intact	3	0.4692
AD_CA04	One-handers	48	Intact	4	0.376419
AD_CA04	One-handers	48	Intact	5	0.477322
AD_CA04	One-handers	48	Intact	6	0.314953
AD_CA05	One-handers	22	Intact	1	0.198059
AD_CA05	One-handers	22	Intact	2	0.193021
AD_CA05	One-handers	22	Intact	3	0.214489
AD_CA05	One-handers	22	Intact	4	0.236902
AD_CA05	One-handers	22	Intact	5	0.178706
AD_CA05	One-handers	22	Intact	6	0.0374621
AD_CA06	One-handers	54	Intact	1	0.137854
AD_CA06	One-handers	54	Intact	2	0.282373
AD_CA06	One-handers	54	Intact	3	0.201181
AD_CA06	One-handers	54	Intact	4	0.296132
AD_CA06	One-handers	54	Intact	5	0.277927
AD_CA06	One-handers	54	Intact	6	0.198257
AD_CA07	One-handers	56	Intact	1	0.158362
AD_CA07	One-handers	56	Intact	2	0.2152
AD_CA07	One-handers	56	Intact	3	0.243724
AD_CA07	One-handers	56	Intact	4	0.17839
AD_CA07	One-handers	56	Intact	5	0.24512
AD_CA07	One-handers	56	Intact	6	0.139898
AD_CA08	One-handers	53	Intact	1	0.181862
AD_CA08	One-handers	53	Intact	2	0.280374
AD_CA08	One-handers	53	Intact	3	0.225197
AD_CA08	One-handers	53	Intact	4	0.142478
AD_CA08	One-handers	53	Intact	5	0.236117
AD_CA08	One-handers	53	Intact	6	0.263197
AD_CA09	One-handers	54	Intact	1	0.120492
AD_CA09	One-handers	54	Intact	2	0.131908
AD_CA09	One-handers	54	Intact	3	0.120101
AD_CA09	One-handers	54	Intact	4	-0.0807574
AD_CA09	One-handers	54	Intact	5	-0.0679558
AD_CA09	One-handers	54	Intact	6	0.108182
AD_CA10	One-handers	58	Intact	1	0.153176
AD_CA10	One-handers	58	Intact	2	-0.102597
AD_CA10	One-handers	58	Intact	3	0.218823
AD_CA10	One-handers	58	Intact	4	0.0971539
AD_CA10	One-handers	58	Intact	5	0.195751
AD_CA10	One-handers	58	Intact	6	0.220174
AD_CA11	One-handers	22	Intact	1	0.146111
AD_CA11	One-handers	22	Intact	2	0.217682
AD_CA11	One-handers	22	Intact	3	0.156838
AD_CA11	One-handers	22	Intact	4	0.0863365
AD_CA11	One-handers	22	Intact	5	0.138759
AD_CA11	One-handers	22	Intact	6	0.243455
AD_CA12	One-handers	30	Intact	1	-0.0381283
AD_CA12	One-handers	30	Intact	2	0.318381
AD_CA12	One-handers	30	Intact	3	0.50994
AD_CA12	One-handers	30	Intact	4	0.252914
AD_CA12	One-handers	30	Intact	5	0.452223
AD_CA12	One-handers	30	Intact	6	0.338058
AD_CA13	One-handers	24	Intact	1	0.220767
AD_CA13	One-handers	24	Intact	2	0.239134
AD_CA13	One-handers	24	Intact	3	0.279617
AD_CA13	One-handers	24	Intact	4	0.152781
AD_CA13	One-handers	24	Intact	5	0.278813
AD_CA13	One-handers	24	Intact	6	-0.0344572
AD_CA14	One-handers	33	Intact	1	0.169253
AD_CA14	One-handers	33	Intact	2	0.300436
AD_CA14	One-handers	33	Intact	3	0.357332
AD_CA14	One-handers	33	Intact	4	0.214265
AD_CA14	One-handers	33	Intact	5	0.182227
AD_CA14	One-handers	33	Intact	6	0.311994
AD_CA15	One-handers	39	Intact	1	0.267128
AD_CA15	One-handers	39	Intact	2	0.198436
AD_CA15	One-handers	39	Intact	3	0.295493
AD_CA15	One-handers	39	Intact	4	0.185013
AD_CA15	One-handers	39	Intact	5	0.10201
AD_CA15	One-handers	39	Intact	6	0.0812024
AD_CA16	One-handers	55	Intact	1	0.219597
AD_CA16	One-handers	55	Intact	2	0.196083
AD_CA16	One-handers	55	Intact	3	0.248026
AD_CA16	One-handers	55	Intact	4	0.123294
AD_CA16	One-handers	55	Intact	5	0.164289
AD_CA16	One-handers	55	Intact	6	0.0939501
AD_CA17	One-handers	67	Intact	1	0.232621
AD_CA17	One-handers	67	Intact	2	0.18887
AD_CA17	One-handers	67	Intact	3	0.245538
AD_CA17	One-handers	67	Intact	4	-0.135761
AD_CA17	One-handers	67	Intact	5	0.0634806
AD_CA17	One-handers	67	Intact	6	-0.0815153
AD_CA18	One-handers	30	Intact	1	0.221414
AD_CA18	One-handers	30	Intact	2	0.335993
AD_CA18	One-handers	30	Intact	3	0.284769
AD_CA18	One-handers	30	Intact	4	0.184168
AD_CA18	One-handers	30	Intact	5	0.239868
AD_CA18	One-handers	30	Intact	6	0.225125
AD_CA19	One-handers	43	Intact	1	0.199425
AD_CA19	One-handers	43	Intact	2	0.248328
AD_CA19	One-handers	43	Intact	3	0.319218
AD_CA19	One-handers	43	Intact	4	0.100285
AD_CA19	One-handers	43	Intact	5	0.251613
AD_CA19	One-handers	43	Intact	6	0.122749
AD_CA20	One-handers	63	Intact	1	0.290977
AD_CA20	One-handers	63	Intact	2	0.354896
AD_CA20	One-handers	63	Intact	3	0.264795
AD_CA20	One-handers	63	Intact	4	0.14868
AD_CA20	One-handers	63	Intact	5	0.0417748
AD_CA20	One-handers	63	Intact	6	0.0889461
AD_CA21	One-handers	46	Intact	1	0.0778166
AD_CA21	One-handers	46	Intact	2	-0.0670676
AD_CA21	One-handers	46	Intact	3	0.0950917
AD_CA21	One-handers	46	Intact	4	-0.128506
AD_CA21	One-handers	46	Intact	5	0.159462
AD_CA21	One-handers	46	Intact	6	0.122948
AD_CA01	One-handers	32	Deprived	1	0.200156
AD_CA01	One-handers	32	Deprived	2	0.255907
AD_CA01	One-handers	32	Deprived	3	0.387434
AD_CA01	One-handers	32	Deprived	4	0.187167
AD_CA01	One-handers	32	Deprived	5	0.411288
AD_CA01	One-handers	32	Deprived	6	0.41443
AD_CA02	One-handers	32	Deprived	1	0.445353
AD_CA02	One-handers	32	Deprived	2	0.683109
AD_CA02	One-handers	32	Deprived	3	0.544803
AD_CA02	One-handers	32	Deprived	4	0.460666
AD_CA02	One-handers	32	Deprived	5	0.450522
AD_CA02	One-handers	32	Deprived	6	0.608832
AD_CA03	One-handers	35	Deprived	1	0.230043
AD_CA03	One-handers	35	Deprived	2	0.393603
AD_CA03	One-handers	35	Deprived	3	0.338072
AD_CA03	One-handers	35	Deprived	4	0.329093
AD_CA03	One-handers	35	Deprived	5	0.374366
AD_CA03	One-handers	35	Deprived	6	0.259929
AD_CA04	One-handers	48	Deprived	1	0.171795
AD_CA04	One-handers	48	Deprived	2	0.469596
AD_CA04	One-handers	48	Deprived	3	0.320459
AD_CA04	One-handers	48	Deprived	4	0.426252
AD_CA04	One-handers	48	Deprived	5	0.298792
AD_CA04	One-handers	48	Deprived	6	0.322569
AD_CA05	One-handers	22	Deprived	1	0.155073
AD_CA05	One-handers	22	Deprived	2	0.0401781
AD_CA05	One-handers	22	Deprived	3	0.17497
AD_CA05	One-handers	22	Deprived	4	0.177918
AD_CA05	One-handers	22	Deprived	5	0.209126
AD_CA05	One-handers	22	Deprived	6	-0.138526
AD_CA06	One-handers	54	Deprived	1	0.212473
AD_CA06	One-handers	54	Deprived	2	0.334001
AD_CA06	One-handers	54	Deprived	3	0.244757
AD_CA06	One-handers	54	Deprived	4	0.289003
AD_CA06	One-handers	54	Deprived	5	0.212176
AD_CA06	One-handers	54	Deprived	6	0.164183
AD_CA07	One-handers	56	Deprived	1	0.216545
AD_CA07	One-handers	56	Deprived	2	0.316967
AD_CA07	One-handers	56	Deprived	3	0.284197
AD_CA07	One-handers	56	Deprived	4	0.377698
AD_CA07	One-handers	56	Deprived	5	0.400693
AD_CA07	One-handers	56	Deprived	6	0.286637
AD_CA08	One-handers	53	Deprived	1	0.170062
AD_CA08	One-handers	53	Deprived	2	0.346101
AD_CA08	One-handers	53	Deprived	3	0.321412
AD_CA08	One-handers	53	Deprived	4	0.217738
AD_CA08	One-handers	53	Deprived	5	0.164791
AD_CA08	One-handers	53	Deprived	6	0.0788193
AD_CA09	One-handers	54	Deprived	1	0.135224
AD_CA09	One-handers	54	Deprived	2	0.267737
AD_CA09	One-handers	54	Deprived	3	0.362243
AD_CA09	One-handers	54	Deprived	4	0.118253
AD_CA09	One-handers	54	Deprived	5	0.332965
AD_CA09	One-handers	54	Deprived	6	0.242808
AD_CA10	One-handers	58	Deprived	1	0.131207
AD_CA10	One-handers	58	Deprived	2	0.14627
AD_CA10	One-handers	58	Deprived	3	0.294014
AD_CA10	One-handers	58	Deprived	4	0.219336
AD_CA10	One-handers	58	Deprived	5	0.269926
AD_CA10	One-handers	58	Deprived	6	0.167406
AD_CA11	One-handers	22	Deprived	1	0.194428
AD_CA11	One-handers	22	Deprived	2	0.181982
AD_CA11	One-handers	22	Deprived	3	0.318502
AD_CA11	One-handers	22	Deprived	4	0.254326
AD_CA11	One-handers	22	Deprived	5	0.356939
AD_CA11	One-handers	22	Deprived	6	0.210707
AD_CA12	One-handers	30	Deprived	1	0.223047
AD_CA12	One-handers	30	Deprived	2	0.407109
AD_CA12	One-handers	30	Deprived	3	0.498591
AD_CA12	One-handers	30	Deprived	4	0.337735
AD_CA12	One-handers	30	Deprived	5	0.458751
AD_CA12	One-handers	30	Deprived	6	0.503177
AD_CA13	One-handers	24	Deprived	1	0.28274
AD_CA13	One-handers	24	Deprived	2	0.488907
AD_CA13	One-handers	24	Deprived	3	0.491962
AD_CA13	One-handers	24	Deprived	4	0.307059
AD_CA13	One-handers	24	Deprived	5	0.503185
AD_CA13	One-handers	24	Deprived	6	0.34869
AD_CA14	One-handers	33	Deprived	1	0.113749
AD_CA14	One-handers	33	Deprived	2	0.340536
AD_CA14	One-handers	33	Deprived	3	0.30355
AD_CA14	One-handers	33	Deprived	4	0.275468
AD_CA14	One-handers	33	Deprived	5	0.273242
AD_CA14	One-handers	33	Deprived	6	0.214307
AD_CA15	One-handers	39	Deprived	1	0.206396
AD_CA15	One-handers	39	Deprived	2	0.235331
AD_CA15	One-handers	39	Deprived	3	0.262474
AD_CA15	One-handers	39	Deprived	4	0.177012
AD_CA15	One-handers	39	Deprived	5	-0.0977311
AD_CA15	One-handers	39	Deprived	6	-0.0604804
AD_CA16	One-handers	55	Deprived	1	0.304094
AD_CA16	One-handers	55	Deprived	2	0.375618
AD_CA16	One-handers	55	Deprived	3	0.389233
AD_CA16	One-handers	55	Deprived	4	0.216627
AD_CA16	One-handers	55	Deprived	5	0.171452
AD_CA16	One-handers	55	Deprived	6	0.266626
AD_CA17	One-handers	67	Deprived	1	0.285982
AD_CA17	One-handers	67	Deprived	2	0.343261
AD_CA17	One-handers	67	Deprived	3	0.360351
AD_CA17	One-handers	67	Deprived	4	0.243635
AD_CA17	One-handers	67	Deprived	5	0.342584
AD_CA17	One-handers	67	Deprived	6	0.373954
AD_CA18	One-handers	30	Deprived	1	0.21446
AD_CA18	One-handers	30	Deprived	2	0.415395
AD_CA18	One-handers	30	Deprived	3	0.356838
AD_CA18	One-handers	30	Deprived	4	0.351432
AD_CA18	One-handers	30	Deprived	5	0.328995
AD_CA18	One-handers	30	Deprived	6	0.0956265
AD_CA19	One-handers	43	Deprived	1	0.204125
AD_CA19	One-handers	43	Deprived	2	0.258191
AD_CA19	One-handers	43	Deprived	3	0.30653
AD_CA19	One-handers	43	Deprived	4	0.187881
AD_CA19	One-handers	43	Deprived	5	0.136289
AD_CA19	One-handers	43	Deprived	6	0.127027
AD_CA20	One-handers	63	Deprived	1	0.296119
AD_CA20	One-handers	63	Deprived	2	0.358094
AD_CA20	One-handers	63	Deprived	3	0.378632
AD_CA20	One-handers	63	Deprived	4	0.113875
AD_CA20	One-handers	63	Deprived	5	0.187639
AD_CA20	One-handers	63	Deprived	6	0.136856
AD_CA21	One-handers	46	Deprived	1	0.0915762
AD_CA21	One-handers	46	Deprived	2	0.268213
AD_CA21	One-handers	46	Deprived	3	0.227152
AD_CA21	One-handers	46	Deprived	4	-0.101699
AD_CA21	One-handers	46	Deprived	5	0.187419
AD_CA21	One-handers	46	Deprived	6	0.329479
AD_CT01	Controls	40	Intact	1	0.16418
AD_CT01	Controls	40	Intact	2	0.204745
AD_CT01	Controls	40	Intact	3	0.30074
AD_CT01	Controls	40	Intact	4	0.22158
AD_CT01	Controls	40	Intact	5	0.275191
AD_CT01	Controls	40	Intact	6	0.221336
AD_CT02	Controls	36	Intact	1	0.199191
AD_CT02	Controls	36	Intact	2	0.398475
AD_CT02	Controls	36	Intact	3	0.245795
AD_CT02	Controls	36	Intact	4	0.407545
AD_CT02	Controls	36	Intact	5	0.187469
AD_CT02	Controls	36	Intact	6	0.395867
AD_CT03	Controls	26	Intact	1	0.188877
AD_CT03	Controls	26	Intact	2	0.353729
AD_CT03	Controls	26	Intact	3	0.390907
AD_CT03	Controls	26	Intact	4	0.255248
AD_CT03	Controls	26	Intact	5	0.32315
AD_CT03	Controls	26	Intact	6	0.220656
AD_CT04	Controls	35	Intact	1	0.288574
AD_CT04	Controls	35	Intact	2	0.333586
AD_CT04	Controls	35	Intact	3	0.444736
AD_CT04	Controls	35	Intact	4	0.149428
AD_CT04	Controls	35	Intact	5	0.291758
AD_CT04	Controls	35	Intact	6	0.180591
AD_CT05	Controls	55	Intact	1	0.0635573
AD_CT05	Controls	55	Intact	2	-0.0335086
AD_CT05	Controls	55	Intact	3	0.183898
AD_CT05	Controls	55	Intact	4	0.207762
AD_CT05	Controls	55	Intact	5	0.211495
AD_CT05	Controls	55	Intact	6	-0.139022
AD_CT06	Controls	33	Intact	1	0.144387
AD_CT06	Controls	33	Intact	2	0.248316
AD_CT06	Controls	33	Intact	3	0.184379
AD_CT06	Controls	33	Intact	4	0.0866533
AD_CT06	Controls	33	Intact	5	0.146635
AD_CT06	Controls	33	Intact	6	0.0692733
AD_CT07	Controls	46	Intact	1	0.19056
AD_CT07	Controls	46	Intact	2	0.207853
AD_CT07	Controls	46	Intact	3	0.236382
AD_CT07	Controls	46	Intact	4	0.203771
AD_CT07	Controls	46	Intact	5	0.196099
AD_CT07	Controls	46	Intact	6	0.196691
AD_CT08	Controls	48	Intact	1	0.0338191
AD_CT08	Controls	48	Intact	2	-0.0586916
AD_CT08	Controls	48	Intact	3	0.0450864
AD_CT08	Controls	48	Intact	4	0.152875
AD_CT08	Controls	48	Intact	5	0.170208
AD_CT08	Controls	48	Intact	6	0.0868089
AD_CT09	Controls	45	Intact	1	0.199861
AD_CT09	Controls	45	Intact	2	0.163208
AD_CT09	Controls	45	Intact	3	0.255811
AD_CT09	Controls	45	Intact	4	0.105196
AD_CT09	Controls	45	Intact	5	0.249106
AD_CT09	Controls	45	Intact	6	0.278109
AD_CT10	Controls	36	Intact	1	0.196637
AD_CT10	Controls	36	Intact	2	0.269186
AD_CT10	Controls	36	Intact	3	0.28514
AD_CT10	Controls	36	Intact	4	0.179816
AD_CT10	Controls	36	Intact	5	0.146643
AD_CT10	Controls	36	Intact	6	0.0748321
AD_CT11	Controls	51	Intact	1	0.148603
AD_CT11	Controls	51	Intact	2	0.354766
AD_CT11	Controls	51	Intact	3	0.234918
AD_CT11	Controls	51	Intact	4	0.183846
AD_CT11	Controls	51	Intact	5	-0.110978
AD_CT11	Controls	51	Intact	6	0.15886
AD_CT12	Controls	43	Intact	1	0.269055
AD_CT12	Controls	43	Intact	2	0.45397
AD_CT12	Controls	43	Intact	3	0.349927
AD_CT12	Controls	43	Intact	4	0.309007
AD_CT12	Controls	43	Intact	5	0.225984
AD_CT12	Controls	43	Intact	6	0.181745
AD_CT13	Controls	61	Intact	1	-0.116323
AD_CT13	Controls	61	Intact	2	0.457313
AD_CT13	Controls	61	Intact	3	0.38503
AD_CT13	Controls	61	Intact	4	0.399076
AD_CT13	Controls	61	Intact	5	0.314189
AD_CT13	Controls	61	Intact	6	0.213219
AD_CT14	Controls	53	Intact	1	0.142048
AD_CT14	Controls	53	Intact	2	0.320381
AD_CT14	Controls	53	Intact	3	0.382474
AD_CT14	Controls	53	Intact	4	0.18659
AD_CT14	Controls	53	Intact	5	0.294069
AD_CT14	Controls	53	Intact	6	0.169424
AD_CT15	Controls	60	Intact	1	0.192429
AD_CT15	Controls	60	Intact	2	0.0426222
AD_CT15	Controls	60	Intact	3	0.101439
AD_CT15	Controls	60	Intact	4	0.223235
AD_CT15	Controls	60	Intact	5	0.189374
AD_CT15	Controls	60	Intact	6	-0.0691251
AD_CT16	Controls	45	Intact	1	0.203593
AD_CT16	Controls	45	Intact	2	0.215597
AD_CT16	Controls	45	Intact	3	0.2723
AD_CT16	Controls	45	Intact	4	0.0972535
AD_CT16	Controls	45	Intact	5	0.235943
AD_CT16	Controls	45	Intact	6	0.268367
AD_CT17	Controls	56	Intact	1	0.197817
AD_CT17	Controls	56	Intact	2	0.17032
AD_CT17	Controls	56	Intact	3	0.26688
AD_CT17	Controls	56	Intact	4	0.127891
AD_CT17	Controls	56	Intact	5	0.259351
AD_CT17	Controls	56	Intact	6	0.170795
AD_CT18	Controls	49	Intact	1	0.120918
AD_CT18	Controls	49	Intact	2	0.185885
AD_CT18	Controls	49	Intact	3	0.273356
AD_CT18	Controls	49	Intact	4	0.214551
AD_CT18	Controls	49	Intact	5	0.25747
AD_CT18	Controls	49	Intact	6	0.244768
AD_CT19	Controls	41	Intact	1	0.135447
AD_CT19	Controls	41	Intact	2	0.199226
AD_CT19	Controls	41	Intact	3	0.226617
AD_CT19	Controls	41	Intact	4	0.0540429
AD_CT19	Controls	41	Intact	5	0.191301
AD_CT19	Controls	41	Intact	6	0.117971
AD_CT20	Controls	41	Intact	1	0.263368
AD_CT20	Controls	41	Intact	2	0.371906
AD_CT20	Controls	41	Intact	3	0.381804
AD_CT20	Controls	41	Intact	4	0.352431
AD_CT20	Controls	41	Intact	5	0.231651
AD_CT20	Controls	41	Intact	6	0.188082
AD_CT21	Controls	42	Intact	1	-0.156116
AD_CT21	Controls	42	Intact	2	0.128416
AD_CT21	Controls	42	Intact	3	-0.189119
AD_CT21	Controls	42	Intact	4	0.14184
AD_CT21	Controls	42	Intact	5	0.123831
AD_CT21	Controls	42	Intact	6	0.173678
AD_CT22	Controls	60	Intact	1	0.328735
AD_CT22	Controls	60	Intact	2	0.316396
AD_CT22	Controls	60	Intact	3	0.4815
AD_CT22	Controls	60	Intact	4	0.285862
AD_CT22	Controls	60	Intact	5	0.302913
AD_CT22	Controls	60	Intact	6	0.322396
AD_CT01	Controls	40	Deprived	1	0.203041
AD_CT01	Controls	40	Deprived	2	0.465799
AD_CT01	Controls	40	Deprived	3	0.709498
AD_CT01	Controls	40	Deprived	4	0.317974
AD_CT01	Controls	40	Deprived	5	0.612017
AD_CT01	Controls	40	Deprived	6	0.356075
AD_CT02	Controls	36	Deprived	1	0.170169
AD_CT02	Controls	36	Deprived	2	0.243763
AD_CT02	Controls	36	Deprived	3	0.221381
AD_CT02	Controls	36	Deprived	4	0.119481
AD_CT02	Controls	36	Deprived	5	0.140786
AD_CT02	Controls	36	Deprived	6	0.112274
AD_CT03	Controls	26	Deprived	1	0.111506
AD_CT03	Controls	26	Deprived	2	0.448705
AD_CT03	Controls	26	Deprived	3	0.487901
AD_CT03	Controls	26	Deprived	4	0.344298
AD_CT03	Controls	26	Deprived	5	0.34149
AD_CT03	Controls	26	Deprived	6	0.304867
AD_CT04	Controls	35	Deprived	1	0.0817512
AD_CT04	Controls	35	Deprived	2	0.151701
AD_CT04	Controls	35	Deprived	3	0.143205
AD_CT04	Controls	35	Deprived	4	0.163318
AD_CT04	Controls	35	Deprived	5	0.175039
AD_CT04	Controls	35	Deprived	6	-0.0782551
AD_CT05	Controls	55	Deprived	1	0.146796
AD_CT05	Controls	55	Deprived	2	-0.100312
AD_CT05	Controls	55	Deprived	3	0.203495
AD_CT05	Controls	55	Deprived	4	0.161397
AD_CT05	Controls	55	Deprived	5	0.237938
AD_CT05	Controls	55	Deprived	6	0.0996297
AD_CT06	Controls	33	Deprived	1	0.0586335
AD_CT06	Controls	33	Deprived	2	0.0659785
AD_CT06	Controls	33	Deprived	3	0.0765995
AD_CT06	Controls	33	Deprived	4	0.0825828
AD_CT06	Controls	33	Deprived	5	0.0803413
AD_CT06	Controls	33	Deprived	6	0.0652162
AD_CT07	Controls	46	Deprived	1	0.130985
AD_CT07	Controls	46	Deprived	2	0.108767
AD_CT07	Controls	46	Deprived	3	0.193459
AD_CT07	Controls	46	Deprived	4	0.069574
AD_CT07	Controls	46	Deprived	5	0.0811933
AD_CT07	Controls	46	Deprived	6	-0.0862344
AD_CT08	Controls	48	Deprived	1	-0.0662172
AD_CT08	Controls	48	Deprived	2	-0.0982948
AD_CT08	Controls	48	Deprived	3	0.224784
AD_CT08	Controls	48	Deprived	4	0.0814617
AD_CT08	Controls	48	Deprived	5	0.178842
AD_CT08	Controls	48	Deprived	6	0.145336
AD_CT09	Controls	45	Deprived	1	0.118812
AD_CT09	Controls	45	Deprived	2	0.263911
AD_CT09	Controls	45	Deprived	3	0.331898
AD_CT09	Controls	45	Deprived	4	0.063698
AD_CT09	Controls	45	Deprived	5	0.18124
AD_CT09	Controls	45	Deprived	6	0.247026
AD_CT10	Controls	36	Deprived	1	0.238276
AD_CT10	Controls	36	Deprived	2	0.329855
AD_CT10	Controls	36	Deprived	3	0.40166
AD_CT10	Controls	36	Deprived	4	0.287281
AD_CT10	Controls	36	Deprived	5	0.377711
AD_CT10	Controls	36	Deprived	6	0.171466
AD_CT11	Controls	51	Deprived	1	-0.0784589
AD_CT11	Controls	51	Deprived	2	0.181268
AD_CT11	Controls	51	Deprived	3	0.202507
AD_CT11	Controls	51	Deprived	4	0.140512
AD_CT11	Controls	51	Deprived	5	0.225401
AD_CT11	Controls	51	Deprived	6	0.188507
AD_CT12	Controls	43	Deprived	1	0.220969
AD_CT12	Controls	43	Deprived	2	0.206401
AD_CT12	Controls	43	Deprived	3	0.370203
AD_CT12	Controls	43	Deprived	4	0.277645
AD_CT12	Controls	43	Deprived	5	0.354901
AD_CT12	Controls	43	Deprived	6	0.150236
AD_CT13	Controls	61	Deprived	1	0.226163
AD_CT13	Controls	61	Deprived	2	0.228238
AD_CT13	Controls	61	Deprived	3	0.205901
AD_CT13	Controls	61	Deprived	4	0.225161
AD_CT13	Controls	61	Deprived	5	0.145045
AD_CT13	Controls	61	Deprived	6	0.162578
AD_CT14	Controls	53	Deprived	1	0.124594
AD_CT14	Controls	53	Deprived	2	0.254425
AD_CT14	Controls	53	Deprived	3	0.296048
AD_CT14	Controls	53	Deprived	4	0.166375
AD_CT14	Controls	53	Deprived	5	0.279489
AD_CT14	Controls	53	Deprived	6	0.10791
AD_CT15	Controls	60	Deprived	1	0.311589
AD_CT15	Controls	60	Deprived	2	0.256659
AD_CT15	Controls	60	Deprived	3	0.357266
AD_CT15	Controls	60	Deprived	4	0.364902
AD_CT15	Controls	60	Deprived	5	0.298403
AD_CT15	Controls	60	Deprived	6	0.146203
AD_CT16	Controls	45	Deprived	1	0.0869486
AD_CT16	Controls	45	Deprived	2	0.242987
AD_CT16	Controls	45	Deprived	3	0.31505
AD_CT16	Controls	45	Deprived	4	0.128389
AD_CT16	Controls	45	Deprived	5	0.145537
AD_CT16	Controls	45	Deprived	6	0.119849
AD_CT17	Controls	56	Deprived	1	0.209747
AD_CT17	Controls	56	Deprived	2	0.24668
AD_CT17	Controls	56	Deprived	3	0.289955
AD_CT17	Controls	56	Deprived	4	0.147933
AD_CT17	Controls	56	Deprived	5	0.222201
AD_CT17	Controls	56	Deprived	6	0.183819
AD_CT18	Controls	49	Deprived	1	0.188434
AD_CT18	Controls	49	Deprived	2	0.295499
AD_CT18	Controls	49	Deprived	3	0.42621
AD_CT18	Controls	49	Deprived	4	0.217934
AD_CT18	Controls	49	Deprived	5	0.352882
AD_CT18	Controls	49	Deprived	6	0.324828
AD_CT19	Controls	41	Deprived	1	-0.0845737
AD_CT19	Controls	41	Deprived	2	0.133939
AD_CT19	Controls	41	Deprived	3	0.314448
AD_CT19	Controls	41	Deprived	4	0.213219
AD_CT19	Controls	41	Deprived	5	0.262543
AD_CT19	Controls	41	Deprived	6	0.214697
AD_CT20	Controls	41	Deprived	1	0.175493
AD_CT20	Controls	41	Deprived	2	0.292592
AD_CT20	Controls	41	Deprived	3	0.237149
AD_CT20	Controls	41	Deprived	4	0.273414
AD_CT20	Controls	41	Deprived	5	0.229717
AD_CT20	Controls	41	Deprived	6	-0.0708091
AD_CT21	Controls	42	Deprived	1	-0.127684
AD_CT21	Controls	42	Deprived	2	0.175381
AD_CT21	Controls	42	Deprived	3	0.0729375
AD_CT21	Controls	42	Deprived	4	-0.158508
AD_CT21	Controls	42	Deprived	5	-0.191357
AD_CT21	Controls	42	Deprived	6	0.0636673
AD_CT22	Controls	60	Deprived	1	0.184669
AD_CT22	Controls	60	Deprived	2	0.105627
AD_CT22	Controls	60	Deprived	3	0.251163
AD_CT22	Controls	60	Deprived	4	0.156542
AD_CT22	Controls	60	Deprived	5	0.189857
AD_CT22	Controls	60	Deprived	6	0.168808
