# Supplementary material for: Complex pattern of facial remapping in somatosensory cortex following congenital but not acquired hand loss
Source: eLife. 2022 Dec 30;11:e76158. doi: 10.7554/eLife.76158 (PMC9851617; doi:10.7554/eLife.76158)
Supplement: Figure 6—source data 4. [file elife-76158-fig6-data4.xlsx]

## Sheet: Fig 6. - source data 4
Figure 6 - Source Data 4. Multivariate distances for face-face pairs in the M1 hand region-of-interest for amputees, one-handers and controls.
ID	Group	Age	Hemisphere	FacePairs	HandROI_Distances
AD_AA01	Amputees	60	Intact	1	-0.0650276
AD_AA01	Amputees	60	Intact	2	-0.0892339
AD_AA01	Amputees	60	Intact	3	0.198455
AD_AA01	Amputees	60	Intact	4	0.123835
AD_AA01	Amputees	60	Intact	5	0.0658087
AD_AA01	Amputees	60	Intact	6	-0.0627902
AD_AA01	Amputees	60	Deprived	1	0.157495
AD_AA01	Amputees	60	Deprived	2	0.160894
AD_AA01	Amputees	60	Deprived	3	0.243165
AD_AA01	Amputees	60	Deprived	4	0.187875
AD_AA01	Amputees	60	Deprived	5	0.145099
AD_AA01	Amputees	60	Deprived	6	0.195512
AD_AA02	Amputees	34	Intact	1	-0.0863427
AD_AA02	Amputees	34	Intact	2	0.0544333
AD_AA02	Amputees	34	Intact	3	0.155534
AD_AA02	Amputees	34	Intact	4	0.116774
AD_AA02	Amputees	34	Intact	5	0.225697
AD_AA02	Amputees	34	Intact	6	0.143872
AD_AA02	Amputees	34	Deprived	1	0.148693
AD_AA02	Amputees	34	Deprived	2	0.1507
AD_AA02	Amputees	34	Deprived	3	0.234462
AD_AA02	Amputees	34	Deprived	4	0.129066
AD_AA02	Amputees	34	Deprived	5	0.185715
AD_AA02	Amputees	34	Deprived	6	0.117749
AD_AA03	Amputees	58	Intact	1	-0.103799
AD_AA03	Amputees	58	Intact	2	0.192401
AD_AA03	Amputees	58	Intact	3	0.186755
AD_AA03	Amputees	58	Intact	4	0.135677
AD_AA03	Amputees	58	Intact	5	0.193441
AD_AA03	Amputees	58	Intact	6	0.125358
AD_AA03	Amputees	58	Deprived	1	0.179465
AD_AA03	Amputees	58	Deprived	2	0.288545
AD_AA03	Amputees	58	Deprived	3	0.256592
AD_AA03	Amputees	58	Deprived	4	0.167562
AD_AA03	Amputees	58	Deprived	5	0.187517
AD_AA03	Amputees	58	Deprived	6	0.174767
AD_AA04	Amputees	59	Intact	1	0.185892
AD_AA04	Amputees	59	Intact	2	0.374272
AD_AA04	Amputees	59	Intact	3	0.234826
AD_AA04	Amputees	59	Intact	4	0.273154
AD_AA04	Amputees	59	Intact	5	0.224158
AD_AA04	Amputees	59	Intact	6	0.375206
AD_AA04	Amputees	59	Deprived	1	0.119367
AD_AA04	Amputees	59	Deprived	2	0.270397
AD_AA04	Amputees	59	Deprived	3	0.254617
AD_AA04	Amputees	59	Deprived	4	0.162249
AD_AA04	Amputees	59	Deprived	5	0.151464
AD_AA04	Amputees	59	Deprived	6	0.202394
AD_AA05	Amputees	54	Intact	1	0.147356
AD_AA05	Amputees	54	Intact	2	0.16774
AD_AA05	Amputees	54	Intact	3	0.223125
AD_AA05	Amputees	54	Intact	4	-0.0897867
AD_AA05	Amputees	54	Intact	5	0.138696
AD_AA05	Amputees	54	Intact	6	0.0866898
AD_AA05	Amputees	54	Deprived	1	0.0518695
AD_AA05	Amputees	54	Deprived	2	0.23657
AD_AA05	Amputees	54	Deprived	3	0.220225
AD_AA05	Amputees	54	Deprived	4	0.167246
AD_AA05	Amputees	54	Deprived	5	0.259307
AD_AA05	Amputees	54	Deprived	6	0.228831
AD_AA06	Amputees	47	Intact	1	0.104175
AD_AA06	Amputees	47	Intact	2	0.122094
AD_AA06	Amputees	47	Intact	3	0.0534013
AD_AA06	Amputees	47	Intact	4	0.115481
AD_AA06	Amputees	47	Intact	5	0.207015
AD_AA06	Amputees	47	Intact	6	0.162196
AD_AA06	Amputees	47	Deprived	1	0.172952
AD_AA06	Amputees	47	Deprived	2	0.333696
AD_AA06	Amputees	47	Deprived	3	0.262295
AD_AA06	Amputees	47	Deprived	4	0.367924
AD_AA06	Amputees	47	Deprived	5	0.29448
AD_AA06	Amputees	47	Deprived	6	0.318633
AD_AA08	Amputees	40	Intact	1	0.115914
AD_AA08	Amputees	40	Intact	2	0.216205
AD_AA08	Amputees	40	Intact	3	0.187772
AD_AA08	Amputees	40	Intact	4	0.0579285
AD_AA08	Amputees	40	Intact	5	0.213053
AD_AA08	Amputees	40	Intact	6	0.203824
AD_AA08	Amputees	40	Deprived	1	0.126083
AD_AA08	Amputees	40	Deprived	2	0.349962
AD_AA08	Amputees	40	Deprived	3	0.330368
AD_AA08	Amputees	40	Deprived	4	0.163363
AD_AA08	Amputees	40	Deprived	5	0.235913
AD_AA08	Amputees	40	Deprived	6	0.318204
AD_AA09	Amputees	47	Intact	1	-0.131362
AD_AA09	Amputees	47	Intact	2	0.274055
AD_AA09	Amputees	47	Intact	3	0.214438
AD_AA09	Amputees	47	Intact	4	0.260477
AD_AA09	Amputees	47	Intact	5	0.208323
AD_AA09	Amputees	47	Intact	6	0.102811
AD_AA09	Amputees	47	Deprived	1	0.20283
AD_AA09	Amputees	47	Deprived	2	0.464844
AD_AA09	Amputees	47	Deprived	3	0.455456
AD_AA09	Amputees	47	Deprived	4	0.233307
AD_AA09	Amputees	47	Deprived	5	0.309601
AD_AA09	Amputees	47	Deprived	6	0.203183
AD_AA10	Amputees	53	Intact	1	-0.121511
AD_AA10	Amputees	53	Intact	2	-0.0338698
AD_AA10	Amputees	53	Intact	3	0.24856
AD_AA10	Amputees	53	Intact	4	-0.0875885
AD_AA10	Amputees	53	Intact	5	0.232844
AD_AA10	Amputees	53	Intact	6	0.221514
AD_AA10	Amputees	53	Deprived	1	0.181914
AD_AA10	Amputees	53	Deprived	2	0.0251454
AD_AA10	Amputees	53	Deprived	3	0.203528
AD_AA10	Amputees	53	Deprived	4	0.203591
AD_AA10	Amputees	53	Deprived	5	0.184882
AD_AA10	Amputees	53	Deprived	6	-0.0794453
AD_AA11	Amputees	56	Intact	1	0.114781
AD_AA11	Amputees	56	Intact	2	0.19059
AD_AA11	Amputees	56	Intact	3	0.21947
AD_AA11	Amputees	56	Intact	4	0.111768
AD_AA11	Amputees	56	Intact	5	0.21217
AD_AA11	Amputees	56	Intact	6	-0.0463803
AD_AA11	Amputees	56	Deprived	1	-0.0833704
AD_AA11	Amputees	56	Deprived	2	0.197105
AD_AA11	Amputees	56	Deprived	3	0.329007
AD_AA11	Amputees	56	Deprived	4	-0.14077
AD_AA11	Amputees	56	Deprived	5	0.311253
AD_AA11	Amputees	56	Deprived	6	0.154189
AD_AA12	Amputees	66	Intact	1	0.307202
AD_AA12	Amputees	66	Intact	2	0.170021
AD_AA12	Amputees	66	Intact	3	0.290437
AD_AA12	Amputees	66	Intact	4	0.236872
AD_AA12	Amputees	66	Intact	5	0.199335
AD_AA12	Amputees	66	Intact	6	0.213124
AD_AA12	Amputees	66	Deprived	1	0.213829
AD_AA12	Amputees	66	Deprived	2	0.247437
AD_AA12	Amputees	66	Deprived	3	0.169297
AD_AA12	Amputees	66	Deprived	4	0.195894
AD_AA12	Amputees	66	Deprived	5	0.17772
AD_AA12	Amputees	66	Deprived	6	0.182184
AD_AA13	Amputees	65	Intact	1	0.0523406
AD_AA13	Amputees	65	Intact	2	0.33472
AD_AA13	Amputees	65	Intact	3	0.391084
AD_AA13	Amputees	65	Intact	4	0.323404
AD_AA13	Amputees	65	Intact	5	0.353577
AD_AA13	Amputees	65	Intact	6	0.230662
AD_AA13	Amputees	65	Deprived	1	0.181246
AD_AA13	Amputees	65	Deprived	2	0.305255
AD_AA13	Amputees	65	Deprived	3	0.170702
AD_AA13	Amputees	65	Deprived	4	0.307507
AD_AA13	Amputees	65	Deprived	5	0.168787
AD_AA13	Amputees	65	Deprived	6	0.244666
AD_AA14	Amputees	66	Intact	1	0.188131
AD_AA14	Amputees	66	Intact	2	0.228323
AD_AA14	Amputees	66	Intact	3	0.200117
AD_AA14	Amputees	66	Intact	4	0.322399
AD_AA14	Amputees	66	Intact	5	0.319052
AD_AA14	Amputees	66	Intact	6	0.0389514
AD_AA14	Amputees	66	Deprived	1	0.0947073
AD_AA14	Amputees	66	Deprived	2	0.235487
AD_AA14	Amputees	66	Deprived	3	0.188291
AD_AA14	Amputees	66	Deprived	4	0.0838847
AD_AA14	Amputees	66	Deprived	5	0.174973
AD_AA14	Amputees	66	Deprived	6	0.0687907
AD_AA16	Amputees	64	Intact	1	0.18182
AD_AA16	Amputees	64	Intact	2	0.217617
AD_AA16	Amputees	64	Intact	3	0.142493
AD_AA16	Amputees	64	Intact	4	0.226114
AD_AA16	Amputees	64	Intact	5	0.176832
AD_AA16	Amputees	64	Intact	6	0.130612
AD_AA16	Amputees	64	Deprived	1	0.203857
AD_AA16	Amputees	64	Deprived	2	0.30574
AD_AA16	Amputees	64	Deprived	3	0.436083
AD_AA16	Amputees	64	Deprived	4	0.197191
AD_AA16	Amputees	64	Deprived	5	0.292317
AD_AA16	Amputees	64	Deprived	6	0.24049
AD_AA17	Amputees	65	Intact	1	0.161
AD_AA17	Amputees	65	Intact	2	0.293427
AD_AA17	Amputees	65	Intact	3	0.303323
AD_AA17	Amputees	65	Intact	4	0.164107
AD_AA17	Amputees	65	Intact	5	0.190616
AD_AA17	Amputees	65	Intact	6	0.214228
AD_AA17	Amputees	65	Deprived	1	0.305542
AD_AA17	Amputees	65	Deprived	2	0.450944
AD_AA17	Amputees	65	Deprived	3	0.463613
AD_AA17	Amputees	65	Deprived	4	0.382147
AD_AA17	Amputees	65	Deprived	5	0.309361
AD_AA17	Amputees	65	Deprived	6	0.0723053
AD_AA18	Amputees	48	Intact	1	0.161196
AD_AA18	Amputees	48	Intact	2	0.025416
AD_AA18	Amputees	48	Intact	3	0.119389
AD_AA18	Amputees	48	Intact	4	0.114917
AD_AA18	Amputees	48	Intact	5	0.0485503
AD_AA18	Amputees	48	Intact	6	0.117866
AD_AA18	Amputees	48	Deprived	1	0.20234
AD_AA18	Amputees	48	Deprived	2	0.155014
AD_AA18	Amputees	48	Deprived	3	0.182158
AD_AA18	Amputees	48	Deprived	4	0.230165
AD_AA18	Amputees	48	Deprived	5	0.235029
AD_AA18	Amputees	48	Deprived	6	0.121076
AD_AA19	Amputees	31	Intact	1	-0.170488
AD_AA19	Amputees	31	Intact	2	0.171958
AD_AA19	Amputees	31	Intact	3	0.235423
AD_AA19	Amputees	31	Intact	4	-0.105876
AD_AA19	Amputees	31	Intact	5	0.00776859
AD_AA19	Amputees	31	Intact	6	0.164796
AD_AA19	Amputees	31	Deprived	1	0.17541
AD_AA19	Amputees	31	Deprived	2	0.190701
AD_AA19	Amputees	31	Deprived	3	0.22803
AD_AA19	Amputees	31	Deprived	4	0.125051
AD_AA19	Amputees	31	Deprived	5	0.0372386
AD_AA19	Amputees	31	Deprived	6	0.103743
AD_CA01	One-handers	32	Intact	1	0.200225
AD_CA01	One-handers	32	Intact	2	0.268139
AD_CA01	One-handers	32	Intact	3	0.563515
AD_CA01	One-handers	32	Intact	4	0.253956
AD_CA01	One-handers	32	Intact	5	0.378351
AD_CA01	One-handers	32	Intact	6	0.481814
AD_CA01	One-handers	32	Deprived	1	0.166815
AD_CA01	One-handers	32	Deprived	2	0.251015
AD_CA01	One-handers	32	Deprived	3	0.409937
AD_CA01	One-handers	32	Deprived	4	0.245345
AD_CA01	One-handers	32	Deprived	5	0.381329
AD_CA01	One-handers	32	Deprived	6	0.42775
AD_CA02	One-handers	32	Intact	1	0.216068
AD_CA02	One-handers	32	Intact	2	0.344232
AD_CA02	One-handers	32	Intact	3	0.316007
AD_CA02	One-handers	32	Intact	4	0.244248
AD_CA02	One-handers	32	Intact	5	0.324075
AD_CA02	One-handers	32	Intact	6	0.48035
AD_CA02	One-handers	32	Deprived	1	0.407597
AD_CA02	One-handers	32	Deprived	2	0.6757
AD_CA02	One-handers	32	Deprived	3	0.685151
AD_CA02	One-handers	32	Deprived	4	0.427978
AD_CA02	One-handers	32	Deprived	5	0.475758
AD_CA02	One-handers	32	Deprived	6	0.607534
AD_CA03	One-handers	35	Intact	1	0.331006
AD_CA03	One-handers	35	Intact	2	0.272107
AD_CA03	One-handers	35	Intact	3	0.175781
AD_CA03	One-handers	35	Intact	4	0.133028
AD_CA03	One-handers	35	Intact	5	0.272944
AD_CA03	One-handers	35	Intact	6	0.221507
AD_CA03	One-handers	35	Deprived	1	0.256189
AD_CA03	One-handers	35	Deprived	2	0.352414
AD_CA03	One-handers	35	Deprived	3	0.433337
AD_CA03	One-handers	35	Deprived	4	0.171735
AD_CA03	One-handers	35	Deprived	5	0.313032
AD_CA03	One-handers	35	Deprived	6	0.372671
AD_CA04	One-handers	48	Intact	1	0.138472
AD_CA04	One-handers	48	Intact	2	0.239901
AD_CA04	One-handers	48	Intact	3	0.298742
AD_CA04	One-handers	48	Intact	4	0.200031
AD_CA04	One-handers	48	Intact	5	0.305814
AD_CA04	One-handers	48	Intact	6	0.250035
AD_CA04	One-handers	48	Deprived	1	-0.0589353
AD_CA04	One-handers	48	Deprived	2	0.257002
AD_CA04	One-handers	48	Deprived	3	0.166337
AD_CA04	One-handers	48	Deprived	4	0.155332
AD_CA04	One-handers	48	Deprived	5	0.215114
AD_CA04	One-handers	48	Deprived	6	0.264235
AD_CA05	One-handers	22	Intact	1	0.113816
AD_CA05	One-handers	22	Intact	2	0.136861
AD_CA05	One-handers	22	Intact	3	-0.0267804
AD_CA05	One-handers	22	Intact	4	0.0929393
AD_CA05	One-handers	22	Intact	5	0.0835455
AD_CA05	One-handers	22	Intact	6	0.125325
AD_CA05	One-handers	22	Deprived	1	0.302975
AD_CA05	One-handers	22	Deprived	2	0.273398
AD_CA05	One-handers	22	Deprived	3	0.287676
AD_CA05	One-handers	22	Deprived	4	0.24233
AD_CA05	One-handers	22	Deprived	5	0.210063
AD_CA05	One-handers	22	Deprived	6	0.222552
AD_CA06	One-handers	54	Intact	1	0.149083
AD_CA06	One-handers	54	Intact	2	0.240477
AD_CA06	One-handers	54	Intact	3	0.161489
AD_CA06	One-handers	54	Intact	4	0.273373
AD_CA06	One-handers	54	Intact	5	0.222228
AD_CA06	One-handers	54	Intact	6	0.165549
AD_CA06	One-handers	54	Deprived	1	0.172612
AD_CA06	One-handers	54	Deprived	2	0.135644
AD_CA06	One-handers	54	Deprived	3	0.155936
AD_CA06	One-handers	54	Deprived	4	0.13482
AD_CA06	One-handers	54	Deprived	5	0.200441
AD_CA06	One-handers	54	Deprived	6	0.0988671
AD_CA07	One-handers	56	Intact	1	-0.0704971
AD_CA07	One-handers	56	Intact	2	0.173955
AD_CA07	One-handers	56	Intact	3	0.224112
AD_CA07	One-handers	56	Intact	4	0.134713
AD_CA07	One-handers	56	Intact	5	0.190149
AD_CA07	One-handers	56	Intact	6	0.0795417
AD_CA07	One-handers	56	Deprived	1	0.243388
AD_CA07	One-handers	56	Deprived	2	0.183351
AD_CA07	One-handers	56	Deprived	3	0.164733
AD_CA07	One-handers	56	Deprived	4	0.181906
AD_CA07	One-handers	56	Deprived	5	0.310981
AD_CA07	One-handers	56	Deprived	6	0.247525
AD_CA08	One-handers	53	Intact	1	0.0168191
AD_CA08	One-handers	53	Intact	2	0.12726
AD_CA08	One-handers	53	Intact	3	0.188445
AD_CA08	One-handers	53	Intact	4	0.0381912
AD_CA08	One-handers	53	Intact	5	0.102599
AD_CA08	One-handers	53	Intact	6	-0.127127
AD_CA08	One-handers	53	Deprived	1	0.0595884
AD_CA08	One-handers	53	Deprived	2	0.282752
AD_CA08	One-handers	53	Deprived	3	0.191212
AD_CA08	One-handers	53	Deprived	4	0.21752
AD_CA08	One-handers	53	Deprived	5	0.180434
AD_CA08	One-handers	53	Deprived	6	0.200075
AD_CA09	One-handers	54	Intact	1	0.147954
AD_CA09	One-handers	54	Intact	2	0.106034
AD_CA09	One-handers	54	Intact	3	0.0671681
AD_CA09	One-handers	54	Intact	4	-0.0884431
AD_CA09	One-handers	54	Intact	5	-0.147751
AD_CA09	One-handers	54	Intact	6	-0.0836928
AD_CA09	One-handers	54	Deprived	1	-0.0693657
AD_CA09	One-handers	54	Deprived	2	0.216217
AD_CA09	One-handers	54	Deprived	3	0.227629
AD_CA09	One-handers	54	Deprived	4	0.211827
AD_CA09	One-handers	54	Deprived	5	0.216347
AD_CA09	One-handers	54	Deprived	6	0.276577
AD_CA10	One-handers	58	Intact	1	-0.0290871
AD_CA10	One-handers	58	Intact	2	-0.105952
AD_CA10	One-handers	58	Intact	3	0.20994
AD_CA10	One-handers	58	Intact	4	0.179491
AD_CA10	One-handers	58	Intact	5	0.272682
AD_CA10	One-handers	58	Intact	6	0.178056
AD_CA10	One-handers	58	Deprived	1	0.0480227
AD_CA10	One-handers	58	Deprived	2	0.24052
AD_CA10	One-handers	58	Deprived	3	0.358934
AD_CA10	One-handers	58	Deprived	4	0.177746
AD_CA10	One-handers	58	Deprived	5	0.257938
AD_CA10	One-handers	58	Deprived	6	0.270367
AD_CA11	One-handers	22	Intact	1	0.194202
AD_CA11	One-handers	22	Intact	2	0.133426
AD_CA11	One-handers	22	Intact	3	0.174562
AD_CA11	One-handers	22	Intact	4	0.0918166
AD_CA11	One-handers	22	Intact	5	0.240823
AD_CA11	One-handers	22	Intact	6	0.190219
AD_CA11	One-handers	22	Deprived	1	0.224226
AD_CA11	One-handers	22	Deprived	2	0.0642496
AD_CA11	One-handers	22	Deprived	3	0.3327
AD_CA11	One-handers	22	Deprived	4	0.232519
AD_CA11	One-handers	22	Deprived	5	0.447082
AD_CA11	One-handers	22	Deprived	6	0.197964
AD_CA12	One-handers	30	Intact	1	-0.0474803
AD_CA12	One-handers	30	Intact	2	0.248194
AD_CA12	One-handers	30	Intact	3	0.642123
AD_CA12	One-handers	30	Intact	4	0.235146
AD_CA12	One-handers	30	Intact	5	0.643793
AD_CA12	One-handers	30	Intact	6	0.430633
AD_CA12	One-handers	30	Deprived	1	0.220484
AD_CA12	One-handers	30	Deprived	2	0.374702
AD_CA12	One-handers	30	Deprived	3	0.363777
AD_CA12	One-handers	30	Deprived	4	0.243608
AD_CA12	One-handers	30	Deprived	5	0.370657
AD_CA12	One-handers	30	Deprived	6	0.400329
AD_CA13	One-handers	24	Intact	1	0.153492
AD_CA13	One-handers	24	Intact	2	0.428033
AD_CA13	One-handers	24	Intact	3	0.29411
AD_CA13	One-handers	24	Intact	4	0.355798
AD_CA13	One-handers	24	Intact	5	0.252896
AD_CA13	One-handers	24	Intact	6	0.277706
AD_CA13	One-handers	24	Deprived	1	0.355401
AD_CA13	One-handers	24	Deprived	2	0.531031
AD_CA13	One-handers	24	Deprived	3	0.592626
AD_CA13	One-handers	24	Deprived	4	0.292279
AD_CA13	One-handers	24	Deprived	5	0.337038
AD_CA13	One-handers	24	Deprived	6	-0.2096
AD_CA14	One-handers	33	Intact	1	0.172316
AD_CA14	One-handers	33	Intact	2	0.236886
AD_CA14	One-handers	33	Intact	3	0.311823
AD_CA14	One-handers	33	Intact	4	0.132287
AD_CA14	One-handers	33	Intact	5	0.130121
AD_CA14	One-handers	33	Intact	6	0.227076
AD_CA14	One-handers	33	Deprived	1	-0.0482434
AD_CA14	One-handers	33	Deprived	2	0.190104
AD_CA14	One-handers	33	Deprived	3	0.176191
AD_CA14	One-handers	33	Deprived	4	0.0622157
AD_CA14	One-handers	33	Deprived	5	0.0798849
AD_CA14	One-handers	33	Deprived	6	0.160507
AD_CA15	One-handers	39	Intact	1	0.251413
AD_CA15	One-handers	39	Intact	2	0.24235
AD_CA15	One-handers	39	Intact	3	0.229411
AD_CA15	One-handers	39	Intact	4	0.056933
AD_CA15	One-handers	39	Intact	5	0.13705
AD_CA15	One-handers	39	Intact	6	-0.0553669
AD_CA15	One-handers	39	Deprived	1	0.303414
AD_CA15	One-handers	39	Deprived	2	0.222441
AD_CA15	One-handers	39	Deprived	3	0.25508
AD_CA15	One-handers	39	Deprived	4	0.139315
AD_CA15	One-handers	39	Deprived	5	0.171402
AD_CA15	One-handers	39	Deprived	6	-0.124487
AD_CA16	One-handers	55	Intact	1	0.15396
AD_CA16	One-handers	55	Intact	2	0.229971
AD_CA16	One-handers	55	Intact	3	0.342361
AD_CA16	One-handers	55	Intact	4	0.14657
AD_CA16	One-handers	55	Intact	5	0.273179
AD_CA16	One-handers	55	Intact	6	0.160137
AD_CA16	One-handers	55	Deprived	1	0.203952
AD_CA16	One-handers	55	Deprived	2	0.271723
AD_CA16	One-handers	55	Deprived	3	0.295389
AD_CA16	One-handers	55	Deprived	4	0.09624
AD_CA16	One-handers	55	Deprived	5	0.136744
AD_CA16	One-handers	55	Deprived	6	0.13115
AD_CA17	One-handers	67	Intact	1	0.181652
AD_CA17	One-handers	67	Intact	2	0.162403
AD_CA17	One-handers	67	Intact	3	0.286586
AD_CA17	One-handers	67	Intact	4	-0.131285
AD_CA17	One-handers	67	Intact	5	0.202971
AD_CA17	One-handers	67	Intact	6	0.181198
AD_CA17	One-handers	67	Deprived	1	0.237048
AD_CA17	One-handers	67	Deprived	2	0.29943
AD_CA17	One-handers	67	Deprived	3	0.282852
AD_CA17	One-handers	67	Deprived	4	0.187388
AD_CA17	One-handers	67	Deprived	5	0.338496
AD_CA17	One-handers	67	Deprived	6	0.433587
AD_CA18	One-handers	30	Intact	1	0.181734
AD_CA18	One-handers	30	Intact	2	0.223742
AD_CA18	One-handers	30	Intact	3	0.18885
AD_CA18	One-handers	30	Intact	4	0.212462
AD_CA18	One-handers	30	Intact	5	0.203124
AD_CA18	One-handers	30	Intact	6	0.222402
AD_CA18	One-handers	30	Deprived	1	0.216791
AD_CA18	One-handers	30	Deprived	2	0.406662
AD_CA18	One-handers	30	Deprived	3	0.443438
AD_CA18	One-handers	30	Deprived	4	0.256569
AD_CA18	One-handers	30	Deprived	5	0.257865
AD_CA18	One-handers	30	Deprived	6	0.139404
AD_CA19	One-handers	43	Intact	1	0.279249
AD_CA19	One-handers	43	Intact	2	0.347069
AD_CA19	One-handers	43	Intact	3	0.365468
AD_CA19	One-handers	43	Intact	4	0.233344
AD_CA19	One-handers	43	Intact	5	0.278361
AD_CA19	One-handers	43	Intact	6	0.180881
AD_CA19	One-handers	43	Deprived	1	0.120869
AD_CA19	One-handers	43	Deprived	2	0.236212
AD_CA19	One-handers	43	Deprived	3	0.114649
AD_CA19	One-handers	43	Deprived	4	0.107859
AD_CA19	One-handers	43	Deprived	5	0.10149
AD_CA19	One-handers	43	Deprived	6	-0.0677684
AD_CA20	One-handers	63	Intact	1	0.224202
AD_CA20	One-handers	63	Intact	2	0.325695
AD_CA20	One-handers	63	Intact	3	0.336235
AD_CA20	One-handers	63	Intact	4	0.154045
AD_CA20	One-handers	63	Intact	5	0.26003
AD_CA20	One-handers	63	Intact	6	0.181563
AD_CA20	One-handers	63	Deprived	1	0.336546
AD_CA20	One-handers	63	Deprived	2	0.471867
AD_CA20	One-handers	63	Deprived	3	0.535187
AD_CA20	One-handers	63	Deprived	4	0.213275
AD_CA20	One-handers	63	Deprived	5	0.365657
AD_CA20	One-handers	63	Deprived	6	0.251704
AD_CA21	One-handers	46	Intact	1	0.0714654
AD_CA21	One-handers	46	Intact	2	0.144326
AD_CA21	One-handers	46	Intact	3	0.215719
AD_CA21	One-handers	46	Intact	4	-0.125559
AD_CA21	One-handers	46	Intact	5	0.185192
AD_CA21	One-handers	46	Intact	6	0.155505
AD_CA21	One-handers	46	Deprived	1	0.154525
AD_CA21	One-handers	46	Deprived	2	0.282611
AD_CA21	One-handers	46	Deprived	3	0.308352
AD_CA21	One-handers	46	Deprived	4	0.0916932
AD_CA21	One-handers	46	Deprived	5	0.191548
AD_CA21	One-handers	46	Deprived	6	0.170383
AD_CT01	Controls	40	Intact	1	0.182672
AD_CT01	Controls	40	Intact	2	0.17438
AD_CT01	Controls	40	Intact	3	0.238217
AD_CT01	Controls	40	Intact	4	-0.118817
AD_CT01	Controls	40	Intact	5	0.275753
AD_CT01	Controls	40	Intact	6	0.200285
AD_CT01	Controls	40	Deprived	1	0.221714
AD_CT01	Controls	40	Deprived	2	0.22546
AD_CT01	Controls	40	Deprived	3	0.309846
AD_CT01	Controls	40	Deprived	4	0.151202
AD_CT01	Controls	40	Deprived	5	0.271436
AD_CT01	Controls	40	Deprived	6	0.258511
AD_CT02	Controls	36	Intact	1	0.232124
AD_CT02	Controls	36	Intact	2	0.169174
AD_CT02	Controls	36	Intact	3	0.247643
AD_CT02	Controls	36	Intact	4	0.156081
AD_CT02	Controls	36	Intact	5	0.21434
AD_CT02	Controls	36	Intact	6	0.20203
AD_CT02	Controls	36	Deprived	1	0.171835
AD_CT02	Controls	36	Deprived	2	0.262829
AD_CT02	Controls	36	Deprived	3	0.399109
AD_CT02	Controls	36	Deprived	4	0.127436
AD_CT02	Controls	36	Deprived	5	0.300577
AD_CT02	Controls	36	Deprived	6	0.200065
AD_CT03	Controls	26	Intact	1	-0.0134617
AD_CT03	Controls	26	Intact	2	0.351478
AD_CT03	Controls	26	Intact	3	0.360657
AD_CT03	Controls	26	Intact	4	0.272741
AD_CT03	Controls	26	Intact	5	0.339327
AD_CT03	Controls	26	Intact	6	0.246196
AD_CT03	Controls	26	Deprived	1	-0.100306
AD_CT03	Controls	26	Deprived	2	0.22358
AD_CT03	Controls	26	Deprived	3	0.226278
AD_CT03	Controls	26	Deprived	4	0.222843
AD_CT03	Controls	26	Deprived	5	0.185045
AD_CT03	Controls	26	Deprived	6	0.11952
AD_CT04	Controls	35	Intact	1	0.0973078
AD_CT04	Controls	35	Intact	2	0.346117
AD_CT04	Controls	35	Intact	3	0.315614
AD_CT04	Controls	35	Intact	4	0.212734
AD_CT04	Controls	35	Intact	5	0.21135
AD_CT04	Controls	35	Intact	6	0.145256
AD_CT04	Controls	35	Deprived	1	0.13823
AD_CT04	Controls	35	Deprived	2	0.0783809
AD_CT04	Controls	35	Deprived	3	0.184016
AD_CT04	Controls	35	Deprived	4	0.0704149
AD_CT04	Controls	35	Deprived	5	0.0374692
AD_CT04	Controls	35	Deprived	6	-0.145594
AD_CT05	Controls	55	Intact	1	0.161608
AD_CT05	Controls	55	Intact	2	0.0545174
AD_CT05	Controls	55	Intact	3	0.148898
AD_CT05	Controls	55	Intact	4	0.111159
AD_CT05	Controls	55	Intact	5	0.210023
AD_CT05	Controls	55	Intact	6	0.139002
AD_CT05	Controls	55	Deprived	1	0.142392
AD_CT05	Controls	55	Deprived	2	0.188964
AD_CT05	Controls	55	Deprived	3	0.2281
AD_CT05	Controls	55	Deprived	4	0.0953416
AD_CT05	Controls	55	Deprived	5	0.218249
AD_CT05	Controls	55	Deprived	6	0.143161
AD_CT06	Controls	33	Intact	1	0.137889
AD_CT06	Controls	33	Intact	2	0.214339
AD_CT06	Controls	33	Intact	3	0.292305
AD_CT06	Controls	33	Intact	4	0.205725
AD_CT06	Controls	33	Intact	5	0.288469
AD_CT06	Controls	33	Intact	6	0.0464044
AD_CT06	Controls	33	Deprived	1	0.163951
AD_CT06	Controls	33	Deprived	2	-0.0339088
AD_CT06	Controls	33	Deprived	3	0.186946
AD_CT06	Controls	33	Deprived	4	0.0441979
AD_CT06	Controls	33	Deprived	5	0.182963
AD_CT06	Controls	33	Deprived	6	-0.111854
AD_CT07	Controls	46	Intact	1	0.0990047
AD_CT07	Controls	46	Intact	2	0.0978536
AD_CT07	Controls	46	Intact	3	0.140903
AD_CT07	Controls	46	Intact	4	0.137545
AD_CT07	Controls	46	Intact	5	0.179433
AD_CT07	Controls	46	Intact	6	0.157445
AD_CT07	Controls	46	Deprived	1	0.140003
AD_CT07	Controls	46	Deprived	2	0.145064
AD_CT07	Controls	46	Deprived	3	0.287167
AD_CT07	Controls	46	Deprived	4	-0.12362
AD_CT07	Controls	46	Deprived	5	0.173907
AD_CT07	Controls	46	Deprived	6	0.0938672
AD_CT08	Controls	48	Intact	1	-0.0896958
AD_CT08	Controls	48	Intact	2	0.0831248
AD_CT08	Controls	48	Intact	3	-0.107456
AD_CT08	Controls	48	Intact	4	0.120193
AD_CT08	Controls	48	Intact	5	0.0975375
AD_CT08	Controls	48	Intact	6	0.0179638
AD_CT08	Controls	48	Deprived	1	0.0678878
AD_CT08	Controls	48	Deprived	2	0.240518
AD_CT08	Controls	48	Deprived	3	0.0420179
AD_CT08	Controls	48	Deprived	4	0.0686195
AD_CT08	Controls	48	Deprived	5	-0.0448507
AD_CT08	Controls	48	Deprived	6	0.138752
AD_CT09	Controls	45	Intact	1	-0.0611989
AD_CT09	Controls	45	Intact	2	0.318135
AD_CT09	Controls	45	Intact	3	0.120079
AD_CT09	Controls	45	Intact	4	0.195168
AD_CT09	Controls	45	Intact	5	0.161098
AD_CT09	Controls	45	Intact	6	0.304731
AD_CT09	Controls	45	Deprived	1	0.180846
AD_CT09	Controls	45	Deprived	2	0.298159
AD_CT09	Controls	45	Deprived	3	0.238363
AD_CT09	Controls	45	Deprived	4	0.0857852
AD_CT09	Controls	45	Deprived	5	0.157358
AD_CT09	Controls	45	Deprived	6	0.246586
AD_CT10	Controls	36	Intact	1	0.237402
AD_CT10	Controls	36	Intact	2	0.314553
AD_CT10	Controls	36	Intact	3	0.443929
AD_CT10	Controls	36	Intact	4	0.255263
AD_CT10	Controls	36	Intact	5	0.298439
AD_CT10	Controls	36	Intact	6	0.038986
AD_CT10	Controls	36	Deprived	1	0.351949
AD_CT10	Controls	36	Deprived	2	0.616695
AD_CT10	Controls	36	Deprived	3	0.704274
AD_CT10	Controls	36	Deprived	4	0.42167
AD_CT10	Controls	36	Deprived	5	0.494222
AD_CT10	Controls	36	Deprived	6	0.182114
AD_CT11	Controls	51	Intact	1	0.239067
AD_CT11	Controls	51	Intact	2	0.469054
AD_CT11	Controls	51	Intact	3	0.202158
AD_CT11	Controls	51	Intact	4	0.372589
AD_CT11	Controls	51	Intact	5	0.284224
AD_CT11	Controls	51	Intact	6	0.361708
AD_CT11	Controls	51	Deprived	1	-0.127967
AD_CT11	Controls	51	Deprived	2	0.181838
AD_CT11	Controls	51	Deprived	3	0.34091
AD_CT11	Controls	51	Deprived	4	0.16087
AD_CT11	Controls	51	Deprived	5	0.323617
AD_CT11	Controls	51	Deprived	6	0.184291
AD_CT12	Controls	43	Intact	1	0.326382
AD_CT12	Controls	43	Intact	2	0.342152
AD_CT12	Controls	43	Intact	3	0.311501
AD_CT12	Controls	43	Intact	4	0.218047
AD_CT12	Controls	43	Intact	5	0.119436
AD_CT12	Controls	43	Intact	6	0.120157
AD_CT12	Controls	43	Deprived	1	0.259587
AD_CT12	Controls	43	Deprived	2	0.325954
AD_CT12	Controls	43	Deprived	3	0.406506
AD_CT12	Controls	43	Deprived	4	0.274407
AD_CT12	Controls	43	Deprived	5	0.305952
AD_CT12	Controls	43	Deprived	6	0.194547
AD_CT13	Controls	61	Intact	1	0.218162
AD_CT13	Controls	61	Intact	2	0.148114
AD_CT13	Controls	61	Intact	3	0.170024
AD_CT13	Controls	61	Intact	4	0.221164
AD_CT13	Controls	61	Intact	5	0.129694
AD_CT13	Controls	61	Intact	6	0.176945
AD_CT13	Controls	61	Deprived	1	0.220474
AD_CT13	Controls	61	Deprived	2	0.229831
AD_CT13	Controls	61	Deprived	3	0.232053
AD_CT13	Controls	61	Deprived	4	0.221495
AD_CT13	Controls	61	Deprived	5	0.242775
AD_CT13	Controls	61	Deprived	6	0.153796
AD_CT14	Controls	53	Intact	1	0.192895
AD_CT14	Controls	53	Intact	2	0.180756
AD_CT14	Controls	53	Intact	3	0.336054
AD_CT14	Controls	53	Intact	4	0.171026
AD_CT14	Controls	53	Intact	5	0.3133
AD_CT14	Controls	53	Intact	6	0.157643
AD_CT14	Controls	53	Deprived	1	0.0622927
AD_CT14	Controls	53	Deprived	2	0.274266
AD_CT14	Controls	53	Deprived	3	0.197815
AD_CT14	Controls	53	Deprived	4	0.270637
AD_CT14	Controls	53	Deprived	5	0.196545
AD_CT14	Controls	53	Deprived	6	0.0881404
AD_CT15	Controls	60	Intact	1	0.151906
AD_CT15	Controls	60	Intact	2	0.305732
AD_CT15	Controls	60	Intact	3	0.263282
AD_CT15	Controls	60	Intact	4	0.275806
AD_CT15	Controls	60	Intact	5	0.223431
AD_CT15	Controls	60	Intact	6	-0.0907386
AD_CT15	Controls	60	Deprived	1	0.24633
AD_CT15	Controls	60	Deprived	2	0.134679
AD_CT15	Controls	60	Deprived	3	0.236544
AD_CT15	Controls	60	Deprived	4	0.317088
AD_CT15	Controls	60	Deprived	5	0.248854
AD_CT15	Controls	60	Deprived	6	0.121286
AD_CT16	Controls	45	Intact	1	0.182783
AD_CT16	Controls	45	Intact	2	0.228888
AD_CT16	Controls	45	Intact	3	0.157433
AD_CT16	Controls	45	Intact	4	0.110833
AD_CT16	Controls	45	Intact	5	0.105353
AD_CT16	Controls	45	Intact	6	0.147379
AD_CT16	Controls	45	Deprived	1	0.22436
AD_CT16	Controls	45	Deprived	2	0.420523
AD_CT16	Controls	45	Deprived	3	0.418296
AD_CT16	Controls	45	Deprived	4	0.181705
AD_CT16	Controls	45	Deprived	5	0.125274
AD_CT16	Controls	45	Deprived	6	0.110939
AD_CT17	Controls	56	Intact	1	0.0931999
AD_CT17	Controls	56	Intact	2	0.222059
AD_CT17	Controls	56	Intact	3	0.327307
AD_CT17	Controls	56	Intact	4	0.0945593
AD_CT17	Controls	56	Intact	5	0.257365
AD_CT17	Controls	56	Intact	6	0.180291
AD_CT17	Controls	56	Deprived	1	0.1421
AD_CT17	Controls	56	Deprived	2	0.186192
AD_CT17	Controls	56	Deprived	3	0.27557
AD_CT17	Controls	56	Deprived	4	0.133781
AD_CT17	Controls	56	Deprived	5	0.205971
AD_CT17	Controls	56	Deprived	6	0.100013
AD_CT18	Controls	49	Intact	1	0.0295161
AD_CT18	Controls	49	Intact	2	0.113028
AD_CT18	Controls	49	Intact	3	0.148377
AD_CT18	Controls	49	Intact	4	0.0638287
AD_CT18	Controls	49	Intact	5	0.165903
AD_CT18	Controls	49	Intact	6	0.208725
AD_CT18	Controls	49	Deprived	1	0.175293
AD_CT18	Controls	49	Deprived	2	0.251189
AD_CT18	Controls	49	Deprived	3	0.237966
AD_CT18	Controls	49	Deprived	4	0.175635
AD_CT18	Controls	49	Deprived	5	0.231329
AD_CT18	Controls	49	Deprived	6	0.320933
AD_CT19	Controls	41	Intact	1	0.176267
AD_CT19	Controls	41	Intact	2	0.301743
AD_CT19	Controls	41	Intact	3	0.43009
AD_CT19	Controls	41	Intact	4	0.152461
AD_CT19	Controls	41	Intact	5	0.277476
AD_CT19	Controls	41	Intact	6	0.198508
AD_CT19	Controls	41	Deprived	1	0.206826
AD_CT19	Controls	41	Deprived	2	0.202988
AD_CT19	Controls	41	Deprived	3	0.473896
AD_CT19	Controls	41	Deprived	4	0.0863485
AD_CT19	Controls	41	Deprived	5	0.323291
AD_CT19	Controls	41	Deprived	6	0.330039
AD_CT20	Controls	41	Intact	1	0.215162
AD_CT20	Controls	41	Intact	2	0.517183
AD_CT20	Controls	41	Intact	3	0.379042
AD_CT20	Controls	41	Intact	4	0.479651
AD_CT20	Controls	41	Intact	5	0.257189
AD_CT20	Controls	41	Intact	6	0.23417
AD_CT20	Controls	41	Deprived	1	0.0811358
AD_CT20	Controls	41	Deprived	2	0.309144
AD_CT20	Controls	41	Deprived	3	0.236799
AD_CT20	Controls	41	Deprived	4	0.245038
AD_CT20	Controls	41	Deprived	5	0.10537
AD_CT20	Controls	41	Deprived	6	0.094845
AD_CT21	Controls	42	Intact	1	0.193642
AD_CT21	Controls	42	Intact	2	0.233378
AD_CT21	Controls	42	Intact	3	0.2133
AD_CT21	Controls	42	Intact	4	0.18824
AD_CT21	Controls	42	Intact	5	0.212958
AD_CT21	Controls	42	Intact	6	-0.0908979
AD_CT21	Controls	42	Deprived	1	0.17905
AD_CT21	Controls	42	Deprived	2	0.159234
AD_CT21	Controls	42	Deprived	3	0.168365
AD_CT21	Controls	42	Deprived	4	-0.0760611
AD_CT21	Controls	42	Deprived	5	0.147677
AD_CT21	Controls	42	Deprived	6	0.103554
AD_CT22	Controls	60	Intact	1	0.300523
AD_CT22	Controls	60	Intact	2	0.256879
AD_CT22	Controls	60	Intact	3	0.427334
AD_CT22	Controls	60	Intact	4	0.151674
AD_CT22	Controls	60	Intact	5	0.330231
AD_CT22	Controls	60	Intact	6	0.210683
AD_CT22	Controls	60	Deprived	1	0.180933
AD_CT22	Controls	60	Deprived	2	0.0963683
AD_CT22	Controls	60	Deprived	3	0.168919
AD_CT22	Controls	60	Deprived	4	0.173415
AD_CT22	Controls	60	Deprived	5	0.168397
AD_CT22	Controls	60	Deprived	6	0.108293
