# Supplementary material for: Complex pattern of facial remapping in somatosensory cortex following congenital but not acquired hand loss
Source: eLife. 2022 Dec 30;11:e76158. doi: 10.7554/eLife.76158 (PMC9851617; doi:10.7554/eLife.76158)
Supplement: Figure 7—source data 3. [file elife-76158-fig7-data3.xlsx]

## Sheet: Fig 7. - source data 3
Figure 7 - Source Data 3. Multivariate distances for face-face pairs in the face region-of-interest for amputees, one-handers and controls.
ID	Group	Age	Hemisphere	FacePairs	FaceROI_Distances
AD_AA01	Amputees	60	Intact	1	0.287805
AD_AA01	Amputees	60	Intact	2	0.457572
AD_AA01	Amputees	60	Intact	3	0.524727
AD_AA01	Amputees	60	Intact	4	0.387902
AD_AA01	Amputees	60	Intact	5	0.434945
AD_AA01	Amputees	60	Intact	6	0.58413
AD_AA02	Amputees	34	Intact	1	0.213201
AD_AA02	Amputees	34	Intact	2	0.614923
AD_AA02	Amputees	34	Intact	3	0.689675
AD_AA02	Amputees	34	Intact	4	0.522445
AD_AA02	Amputees	34	Intact	5	0.631159
AD_AA02	Amputees	34	Intact	6	0.738859
AD_AA03	Amputees	58	Intact	1	0.461779
AD_AA03	Amputees	58	Intact	2	0.948026
AD_AA03	Amputees	58	Intact	3	1.02087
AD_AA03	Amputees	58	Intact	4	0.566614
AD_AA03	Amputees	58	Intact	5	0.843468
AD_AA03	Amputees	58	Intact	6	0.729968
AD_AA04	Amputees	59	Intact	1	0.240186
AD_AA04	Amputees	59	Intact	2	0.495563
AD_AA04	Amputees	59	Intact	3	0.625328
AD_AA04	Amputees	59	Intact	4	0.386937
AD_AA04	Amputees	59	Intact	5	0.602533
AD_AA04	Amputees	59	Intact	6	0.643912
AD_AA05	Amputees	54	Intact	1	0.253208
AD_AA05	Amputees	54	Intact	2	0.544512
AD_AA05	Amputees	54	Intact	3	0.574516
AD_AA05	Amputees	54	Intact	4	0.533409
AD_AA05	Amputees	54	Intact	5	0.556996
AD_AA05	Amputees	54	Intact	6	0.681228
AD_AA06	Amputees	47	Intact	1	0.421457
AD_AA06	Amputees	47	Intact	2	0.749713
AD_AA06	Amputees	47	Intact	3	0.955332
AD_AA06	Amputees	47	Intact	4	0.813508
AD_AA06	Amputees	47	Intact	5	0.947519
AD_AA06	Amputees	47	Intact	6	0.958036
AD_AA08	Amputees	40	Intact	1	0.146933
AD_AA08	Amputees	40	Intact	2	0.423143
AD_AA08	Amputees	40	Intact	3	0.874801
AD_AA08	Amputees	40	Intact	4	0.347633
AD_AA08	Amputees	40	Intact	5	0.88023
AD_AA08	Amputees	40	Intact	6	0.993173
AD_AA09	Amputees	47	Intact	1	0.201348
AD_AA09	Amputees	47	Intact	2	0.613152
AD_AA09	Amputees	47	Intact	3	0.258055
AD_AA09	Amputees	47	Intact	4	0.46678
AD_AA09	Amputees	47	Intact	5	0.273713
AD_AA09	Amputees	47	Intact	6	0.590894
AD_AA10	Amputees	53	Intact	1	0.250797
AD_AA10	Amputees	53	Intact	2	0.989019
AD_AA10	Amputees	53	Intact	3	1.01722
AD_AA10	Amputees	53	Intact	4	0.746474
AD_AA10	Amputees	53	Intact	5	0.81773
AD_AA10	Amputees	53	Intact	6	0.602985
AD_AA11	Amputees	56	Intact	1	0.207758
AD_AA11	Amputees	56	Intact	2	0.954853
AD_AA11	Amputees	56	Intact	3	0.873513
AD_AA11	Amputees	56	Intact	4	0.792256
AD_AA11	Amputees	56	Intact	5	0.83344
AD_AA11	Amputees	56	Intact	6	0.912824
AD_AA12	Amputees	66	Intact	1	0.432738
AD_AA12	Amputees	66	Intact	2	0.726002
AD_AA12	Amputees	66	Intact	3	0.898746
AD_AA12	Amputees	66	Intact	4	0.535383
AD_AA12	Amputees	66	Intact	5	0.865271
AD_AA12	Amputees	66	Intact	6	0.945651
AD_AA13	Amputees	65	Intact	1	0.139753
AD_AA13	Amputees	65	Intact	2	0.526767
AD_AA13	Amputees	65	Intact	3	0.775
AD_AA13	Amputees	65	Intact	4	0.521596
AD_AA13	Amputees	65	Intact	5	0.750125
AD_AA13	Amputees	65	Intact	6	0.553652
AD_AA14	Amputees	66	Intact	1	0.295268
AD_AA14	Amputees	66	Intact	2	0.83185
AD_AA14	Amputees	66	Intact	3	0.660709
AD_AA14	Amputees	66	Intact	4	0.700464
AD_AA14	Amputees	66	Intact	5	0.505109
AD_AA14	Amputees	66	Intact	6	0.637103
AD_AA16	Amputees	64	Intact	1	0.382929
AD_AA16	Amputees	64	Intact	2	0.612901
AD_AA16	Amputees	64	Intact	3	0.605888
AD_AA16	Amputees	64	Intact	4	0.449236
AD_AA16	Amputees	64	Intact	5	0.333551
AD_AA16	Amputees	64	Intact	6	0.279948
AD_AA17	Amputees	65	Intact	1	0.307309
AD_AA17	Amputees	65	Intact	2	0.817147
AD_AA17	Amputees	65	Intact	3	0.675661
AD_AA17	Amputees	65	Intact	4	0.644515
AD_AA17	Amputees	65	Intact	5	0.533068
AD_AA17	Amputees	65	Intact	6	0.619827
AD_AA18	Amputees	48	Intact	1	0.169526
AD_AA18	Amputees	48	Intact	2	0.537959
AD_AA18	Amputees	48	Intact	3	0.554619
AD_AA18	Amputees	48	Intact	4	0.490644
AD_AA18	Amputees	48	Intact	5	0.518781
AD_AA18	Amputees	48	Intact	6	0.618083
AD_AA19	Amputees	31	Intact	1	0.305409
AD_AA19	Amputees	31	Intact	2	0.609107
AD_AA19	Amputees	31	Intact	3	0.799253
AD_AA19	Amputees	31	Intact	4	0.674084
AD_AA19	Amputees	31	Intact	5	0.822572
AD_AA19	Amputees	31	Intact	6	1.076
AD_AA01	Amputees	60	Deprived	1	0.234067
AD_AA01	Amputees	60	Deprived	2	0.473783
AD_AA01	Amputees	60	Deprived	3	0.592737
AD_AA01	Amputees	60	Deprived	4	0.386953
AD_AA01	Amputees	60	Deprived	5	0.477295
AD_AA01	Amputees	60	Deprived	6	0.453461
AD_AA02	Amputees	34	Deprived	1	0.157167
AD_AA02	Amputees	34	Deprived	2	0.660799
AD_AA02	Amputees	34	Deprived	3	0.773834
AD_AA02	Amputees	34	Deprived	4	0.612341
AD_AA02	Amputees	34	Deprived	5	0.790877
AD_AA02	Amputees	34	Deprived	6	0.749026
AD_AA03	Amputees	58	Deprived	1	0.416667
AD_AA03	Amputees	58	Deprived	2	0.828363
AD_AA03	Amputees	58	Deprived	3	1.08177
AD_AA03	Amputees	58	Deprived	4	0.587198
AD_AA03	Amputees	58	Deprived	5	0.998969
AD_AA03	Amputees	58	Deprived	6	0.786774
AD_AA04	Amputees	59	Deprived	1	0.293989
AD_AA04	Amputees	59	Deprived	2	0.478571
AD_AA04	Amputees	59	Deprived	3	0.565799
AD_AA04	Amputees	59	Deprived	4	0.363618
AD_AA04	Amputees	59	Deprived	5	0.658547
AD_AA04	Amputees	59	Deprived	6	0.665376
AD_AA05	Amputees	54	Deprived	1	0.254341
AD_AA05	Amputees	54	Deprived	2	0.740204
AD_AA05	Amputees	54	Deprived	3	0.643571
AD_AA05	Amputees	54	Deprived	4	0.588484
AD_AA05	Amputees	54	Deprived	5	0.623338
AD_AA05	Amputees	54	Deprived	6	0.715202
AD_AA06	Amputees	47	Deprived	1	0.432455
AD_AA06	Amputees	47	Deprived	2	0.77773
AD_AA06	Amputees	47	Deprived	3	0.82304
AD_AA06	Amputees	47	Deprived	4	0.839615
AD_AA06	Amputees	47	Deprived	5	0.71532
AD_AA06	Amputees	47	Deprived	6	0.869783
AD_AA08	Amputees	40	Deprived	1	0.337905
AD_AA08	Amputees	40	Deprived	2	0.692351
AD_AA08	Amputees	40	Deprived	3	0.977693
AD_AA08	Amputees	40	Deprived	4	0.487709
AD_AA08	Amputees	40	Deprived	5	1.02873
AD_AA08	Amputees	40	Deprived	6	1.11118
AD_AA09	Amputees	47	Deprived	1	0.258463
AD_AA09	Amputees	47	Deprived	2	0.599255
AD_AA09	Amputees	47	Deprived	3	0.382553
AD_AA09	Amputees	47	Deprived	4	0.520118
AD_AA09	Amputees	47	Deprived	5	0.395978
AD_AA09	Amputees	47	Deprived	6	0.623494
AD_AA10	Amputees	53	Deprived	1	0.304599
AD_AA10	Amputees	53	Deprived	2	0.943975
AD_AA10	Amputees	53	Deprived	3	1.01938
AD_AA10	Amputees	53	Deprived	4	0.809993
AD_AA10	Amputees	53	Deprived	5	0.904015
AD_AA10	Amputees	53	Deprived	6	0.701084
AD_AA11	Amputees	56	Deprived	1	0.342665
AD_AA11	Amputees	56	Deprived	2	1.05992
AD_AA11	Amputees	56	Deprived	3	0.824071
AD_AA11	Amputees	56	Deprived	4	0.841987
AD_AA11	Amputees	56	Deprived	5	0.776085
AD_AA11	Amputees	56	Deprived	6	1.03542
AD_AA12	Amputees	66	Deprived	1	0.349664
AD_AA12	Amputees	66	Deprived	2	0.631527
AD_AA12	Amputees	66	Deprived	3	0.913305
AD_AA12	Amputees	66	Deprived	4	0.548682
AD_AA12	Amputees	66	Deprived	5	0.850201
AD_AA12	Amputees	66	Deprived	6	0.873551
AD_AA13	Amputees	65	Deprived	1	0.318716
AD_AA13	Amputees	65	Deprived	2	0.635226
AD_AA13	Amputees	65	Deprived	3	0.776891
AD_AA13	Amputees	65	Deprived	4	0.598874
AD_AA13	Amputees	65	Deprived	5	0.701895
AD_AA13	Amputees	65	Deprived	6	0.523012
AD_AA14	Amputees	66	Deprived	1	0.254269
AD_AA14	Amputees	66	Deprived	2	0.711689
AD_AA14	Amputees	66	Deprived	3	0.561291
AD_AA14	Amputees	66	Deprived	4	0.479476
AD_AA14	Amputees	66	Deprived	5	0.436128
AD_AA14	Amputees	66	Deprived	6	0.676856
AD_AA16	Amputees	64	Deprived	1	0.416238
AD_AA16	Amputees	64	Deprived	2	0.592486
AD_AA16	Amputees	64	Deprived	3	0.59859
AD_AA16	Amputees	64	Deprived	4	0.398498
AD_AA16	Amputees	64	Deprived	5	0.305116
AD_AA16	Amputees	64	Deprived	6	0.28418
AD_AA17	Amputees	65	Deprived	1	0.265395
AD_AA17	Amputees	65	Deprived	2	0.845329
AD_AA17	Amputees	65	Deprived	3	0.772964
AD_AA17	Amputees	65	Deprived	4	0.650912
AD_AA17	Amputees	65	Deprived	5	0.688577
AD_AA17	Amputees	65	Deprived	6	0.614276
AD_AA18	Amputees	48	Deprived	1	0.225882
AD_AA18	Amputees	48	Deprived	2	0.686138
AD_AA18	Amputees	48	Deprived	3	0.642954
AD_AA18	Amputees	48	Deprived	4	0.630051
AD_AA18	Amputees	48	Deprived	5	0.581296
AD_AA18	Amputees	48	Deprived	6	0.73403
AD_AA19	Amputees	31	Deprived	1	0.127777
AD_AA19	Amputees	31	Deprived	2	0.676663
AD_AA19	Amputees	31	Deprived	3	0.77195
AD_AA19	Amputees	31	Deprived	4	0.682136
AD_AA19	Amputees	31	Deprived	5	0.746029
AD_AA19	Amputees	31	Deprived	6	1.07792
AD_CA01	One-handers	32	Intact	1	0.191211
AD_CA01	One-handers	32	Intact	2	0.594888
AD_CA01	One-handers	32	Intact	3	0.744438
AD_CA01	One-handers	32	Intact	4	0.558102
AD_CA01	One-handers	32	Intact	5	0.642605
AD_CA01	One-handers	32	Intact	6	0.730234
AD_CA02	One-handers	32	Intact	1	0.344637
AD_CA02	One-handers	32	Intact	2	0.7827
AD_CA02	One-handers	32	Intact	3	0.721696
AD_CA02	One-handers	32	Intact	4	0.806271
AD_CA02	One-handers	32	Intact	5	0.641146
AD_CA02	One-handers	32	Intact	6	1.03069
AD_CA03	One-handers	35	Intact	1	0.126504
AD_CA03	One-handers	35	Intact	2	0.748951
AD_CA03	One-handers	35	Intact	3	0.594664
AD_CA03	One-handers	35	Intact	4	0.692657
AD_CA03	One-handers	35	Intact	5	0.589215
AD_CA03	One-handers	35	Intact	6	0.844557
AD_CA04	One-handers	48	Intact	1	0.226436
AD_CA04	One-handers	48	Intact	2	0.871761
AD_CA04	One-handers	48	Intact	3	0.881094
AD_CA04	One-handers	48	Intact	4	0.764446
AD_CA04	One-handers	48	Intact	5	0.79113
AD_CA04	One-handers	48	Intact	6	0.933193
AD_CA05	One-handers	22	Intact	1	0.310597
AD_CA05	One-handers	22	Intact	2	0.53446
AD_CA05	One-handers	22	Intact	3	0.676635
AD_CA05	One-handers	22	Intact	4	0.547432
AD_CA05	One-handers	22	Intact	5	0.540666
AD_CA05	One-handers	22	Intact	6	0.728627
AD_CA06	One-handers	54	Intact	1	0.188737
AD_CA06	One-handers	54	Intact	2	0.58861
AD_CA06	One-handers	54	Intact	3	0.713908
AD_CA06	One-handers	54	Intact	4	0.582723
AD_CA06	One-handers	54	Intact	5	0.728255
AD_CA06	One-handers	54	Intact	6	0.880958
AD_CA07	One-handers	56	Intact	1	0.193412
AD_CA07	One-handers	56	Intact	2	0.681243
AD_CA07	One-handers	56	Intact	3	0.716326
AD_CA07	One-handers	56	Intact	4	0.597389
AD_CA07	One-handers	56	Intact	5	0.727296
AD_CA07	One-handers	56	Intact	6	0.903491
AD_CA08	One-handers	53	Intact	1	0.272505
AD_CA08	One-handers	53	Intact	2	0.565538
AD_CA08	One-handers	53	Intact	3	0.556354
AD_CA08	One-handers	53	Intact	4	0.434684
AD_CA08	One-handers	53	Intact	5	0.562315
AD_CA08	One-handers	53	Intact	6	0.515363
AD_CA09	One-handers	54	Intact	1	0.0611117
AD_CA09	One-handers	54	Intact	2	0.460328
AD_CA09	One-handers	54	Intact	3	0.769565
AD_CA09	One-handers	54	Intact	4	0.382038
AD_CA09	One-handers	54	Intact	5	0.729094
AD_CA09	One-handers	54	Intact	6	0.814868
AD_CA10	One-handers	58	Intact	1	0.284964
AD_CA10	One-handers	58	Intact	2	0.55797
AD_CA10	One-handers	58	Intact	3	0.706173
AD_CA10	One-handers	58	Intact	4	0.501902
AD_CA10	One-handers	58	Intact	5	0.591602
AD_CA10	One-handers	58	Intact	6	0.503283
AD_CA11	One-handers	22	Intact	1	0.198838
AD_CA11	One-handers	22	Intact	2	0.43768
AD_CA11	One-handers	22	Intact	3	0.625011
AD_CA11	One-handers	22	Intact	4	0.340914
AD_CA11	One-handers	22	Intact	5	0.66467
AD_CA11	One-handers	22	Intact	6	0.659399
AD_CA12	One-handers	30	Intact	1	0.0940049
AD_CA12	One-handers	30	Intact	2	0.613326
AD_CA12	One-handers	30	Intact	3	0.900936
AD_CA12	One-handers	30	Intact	4	0.552635
AD_CA12	One-handers	30	Intact	5	0.903301
AD_CA12	One-handers	30	Intact	6	1.02972
AD_CA13	One-handers	24	Intact	1	0.464676
AD_CA13	One-handers	24	Intact	2	0.836093
AD_CA13	One-handers	24	Intact	3	0.666552
AD_CA13	One-handers	24	Intact	4	0.629787
AD_CA13	One-handers	24	Intact	5	0.734824
AD_CA13	One-handers	24	Intact	6	0.792026
AD_CA14	One-handers	33	Intact	1	0.334092
AD_CA14	One-handers	33	Intact	2	0.674643
AD_CA14	One-handers	33	Intact	3	0.649104
AD_CA14	One-handers	33	Intact	4	0.530047
AD_CA14	One-handers	33	Intact	5	0.656447
AD_CA14	One-handers	33	Intact	6	0.721353
AD_CA15	One-handers	39	Intact	1	0.382523
AD_CA15	One-handers	39	Intact	2	0.506051
AD_CA15	One-handers	39	Intact	3	0.62053
AD_CA15	One-handers	39	Intact	4	0.4548
AD_CA15	One-handers	39	Intact	5	0.478674
AD_CA15	One-handers	39	Intact	6	0.728259
AD_CA16	One-handers	55	Intact	1	0.234817
AD_CA16	One-handers	55	Intact	2	0.556693
AD_CA16	One-handers	55	Intact	3	0.584698
AD_CA16	One-handers	55	Intact	4	0.502826
AD_CA16	One-handers	55	Intact	5	0.491251
AD_CA16	One-handers	55	Intact	6	0.585723
AD_CA17	One-handers	67	Intact	1	0.423161
AD_CA17	One-handers	67	Intact	2	0.828259
AD_CA17	One-handers	67	Intact	3	0.651437
AD_CA17	One-handers	67	Intact	4	0.614913
AD_CA17	One-handers	67	Intact	5	0.661762
AD_CA17	One-handers	67	Intact	6	0.866956
AD_CA18	One-handers	30	Intact	1	0.284466
AD_CA18	One-handers	30	Intact	2	0.711944
AD_CA18	One-handers	30	Intact	3	0.921213
AD_CA18	One-handers	30	Intact	4	0.618563
AD_CA18	One-handers	30	Intact	5	0.979155
AD_CA18	One-handers	30	Intact	6	0.957694
AD_CA19	One-handers	43	Intact	1	0.278964
AD_CA19	One-handers	43	Intact	2	0.642061
AD_CA19	One-handers	43	Intact	3	0.828628
AD_CA19	One-handers	43	Intact	4	0.515314
AD_CA19	One-handers	43	Intact	5	0.819941
AD_CA19	One-handers	43	Intact	6	0.733889
AD_CA20	One-handers	63	Intact	1	0.423944
AD_CA20	One-handers	63	Intact	2	0.832274
AD_CA20	One-handers	63	Intact	3	0.869701
AD_CA20	One-handers	63	Intact	4	0.533871
AD_CA20	One-handers	63	Intact	5	0.89829
AD_CA20	One-handers	63	Intact	6	0.912445
AD_CA21	One-handers	46	Intact	1	0.268749
AD_CA21	One-handers	46	Intact	2	0.386779
AD_CA21	One-handers	46	Intact	3	0.483079
AD_CA21	One-handers	46	Intact	4	0.114688
AD_CA21	One-handers	46	Intact	5	0.477341
AD_CA21	One-handers	46	Intact	6	0.482611
AD_CA01	One-handers	32	Deprived	1	0.269531
AD_CA01	One-handers	32	Deprived	2	0.677739
AD_CA01	One-handers	32	Deprived	3	0.830758
AD_CA01	One-handers	32	Deprived	4	0.614829
AD_CA01	One-handers	32	Deprived	5	0.805781
AD_CA01	One-handers	32	Deprived	6	0.916052
AD_CA02	One-handers	32	Deprived	1	0.325793
AD_CA02	One-handers	32	Deprived	2	0.712353
AD_CA02	One-handers	32	Deprived	3	0.638918
AD_CA02	One-handers	32	Deprived	4	0.590175
AD_CA02	One-handers	32	Deprived	5	0.709242
AD_CA02	One-handers	32	Deprived	6	0.701159
AD_CA03	One-handers	35	Deprived	1	0.246603
AD_CA03	One-handers	35	Deprived	2	0.70037
AD_CA03	One-handers	35	Deprived	3	0.601441
AD_CA03	One-handers	35	Deprived	4	0.577891
AD_CA03	One-handers	35	Deprived	5	0.531258
AD_CA03	One-handers	35	Deprived	6	0.671849
AD_CA04	One-handers	48	Deprived	1	0.203707
AD_CA04	One-handers	48	Deprived	2	0.868037
AD_CA04	One-handers	48	Deprived	3	0.813441
AD_CA04	One-handers	48	Deprived	4	0.770759
AD_CA04	One-handers	48	Deprived	5	0.747465
AD_CA04	One-handers	48	Deprived	6	0.838858
AD_CA05	One-handers	22	Deprived	1	0.484239
AD_CA05	One-handers	22	Deprived	2	0.503188
AD_CA05	One-handers	22	Deprived	3	0.638279
AD_CA05	One-handers	22	Deprived	4	0.424718
AD_CA05	One-handers	22	Deprived	5	0.60231
AD_CA05	One-handers	22	Deprived	6	0.60942
AD_CA06	One-handers	54	Deprived	1	0.250176
AD_CA06	One-handers	54	Deprived	2	0.716411
AD_CA06	One-handers	54	Deprived	3	0.654364
AD_CA06	One-handers	54	Deprived	4	0.700898
AD_CA06	One-handers	54	Deprived	5	0.614625
AD_CA06	One-handers	54	Deprived	6	0.707059
AD_CA07	One-handers	56	Deprived	1	0.315825
AD_CA07	One-handers	56	Deprived	2	0.665202
AD_CA07	One-handers	56	Deprived	3	0.619945
AD_CA07	One-handers	56	Deprived	4	0.623017
AD_CA07	One-handers	56	Deprived	5	0.636382
AD_CA07	One-handers	56	Deprived	6	0.787862
AD_CA08	One-handers	53	Deprived	1	0.275562
AD_CA08	One-handers	53	Deprived	2	0.511524
AD_CA08	One-handers	53	Deprived	3	0.384871
AD_CA08	One-handers	53	Deprived	4	0.400042
AD_CA08	One-handers	53	Deprived	5	0.366689
AD_CA08	One-handers	53	Deprived	6	0.288051
AD_CA09	One-handers	54	Deprived	1	0.137514
AD_CA09	One-handers	54	Deprived	2	0.481653
AD_CA09	One-handers	54	Deprived	3	0.884969
AD_CA09	One-handers	54	Deprived	4	0.409357
AD_CA09	One-handers	54	Deprived	5	0.872408
AD_CA09	One-handers	54	Deprived	6	0.955475
AD_CA10	One-handers	58	Deprived	1	0.221867
AD_CA10	One-handers	58	Deprived	2	0.663977
AD_CA10	One-handers	58	Deprived	3	0.814852
AD_CA10	One-handers	58	Deprived	4	0.586691
AD_CA10	One-handers	58	Deprived	5	0.692383
AD_CA10	One-handers	58	Deprived	6	0.609574
AD_CA11	One-handers	22	Deprived	1	0.255498
AD_CA11	One-handers	22	Deprived	2	0.604167
AD_CA11	One-handers	22	Deprived	3	0.633332
AD_CA11	One-handers	22	Deprived	4	0.513677
AD_CA11	One-handers	22	Deprived	5	0.648815
AD_CA11	One-handers	22	Deprived	6	0.719303
AD_CA12	One-handers	30	Deprived	1	0.0672223
AD_CA12	One-handers	30	Deprived	2	0.52522
AD_CA12	One-handers	30	Deprived	3	0.695762
AD_CA12	One-handers	30	Deprived	4	0.402938
AD_CA12	One-handers	30	Deprived	5	0.715494
AD_CA12	One-handers	30	Deprived	6	0.74153
AD_CA13	One-handers	24	Deprived	1	0.565904
AD_CA13	One-handers	24	Deprived	2	1.0499
AD_CA13	One-handers	24	Deprived	3	1.1468
AD_CA13	One-handers	24	Deprived	4	0.819377
AD_CA13	One-handers	24	Deprived	5	1.10489
AD_CA13	One-handers	24	Deprived	6	1.0687
AD_CA14	One-handers	33	Deprived	1	0.230395
AD_CA14	One-handers	33	Deprived	2	0.569726
AD_CA14	One-handers	33	Deprived	3	0.639141
AD_CA14	One-handers	33	Deprived	4	0.437472
AD_CA14	One-handers	33	Deprived	5	0.630836
AD_CA14	One-handers	33	Deprived	6	0.581794
AD_CA15	One-handers	39	Deprived	1	0.240443
AD_CA15	One-handers	39	Deprived	2	0.495792
AD_CA15	One-handers	39	Deprived	3	0.604649
AD_CA15	One-handers	39	Deprived	4	0.470819
AD_CA15	One-handers	39	Deprived	5	0.512235
AD_CA15	One-handers	39	Deprived	6	0.789025
AD_CA16	One-handers	55	Deprived	1	0.323432
AD_CA16	One-handers	55	Deprived	2	0.724266
AD_CA16	One-handers	55	Deprived	3	0.605861
AD_CA16	One-handers	55	Deprived	4	0.581038
AD_CA16	One-handers	55	Deprived	5	0.569199
AD_CA16	One-handers	55	Deprived	6	0.697911
AD_CA17	One-handers	67	Deprived	1	0.389035
AD_CA17	One-handers	67	Deprived	2	0.818792
AD_CA17	One-handers	67	Deprived	3	0.77597
AD_CA17	One-handers	67	Deprived	4	0.574329
AD_CA17	One-handers	67	Deprived	5	0.750524
AD_CA17	One-handers	67	Deprived	6	0.94944
AD_CA18	One-handers	30	Deprived	1	0.366058
AD_CA18	One-handers	30	Deprived	2	0.599362
AD_CA18	One-handers	30	Deprived	3	0.926505
AD_CA18	One-handers	30	Deprived	4	0.507451
AD_CA18	One-handers	30	Deprived	5	0.975941
AD_CA18	One-handers	30	Deprived	6	0.91627
AD_CA19	One-handers	43	Deprived	1	0.235719
AD_CA19	One-handers	43	Deprived	2	0.665379
AD_CA19	One-handers	43	Deprived	3	0.764161
AD_CA19	One-handers	43	Deprived	4	0.442938
AD_CA19	One-handers	43	Deprived	5	0.834955
AD_CA19	One-handers	43	Deprived	6	0.877367
AD_CA20	One-handers	63	Deprived	1	0.472734
AD_CA20	One-handers	63	Deprived	2	0.860097
AD_CA20	One-handers	63	Deprived	3	0.846042
AD_CA20	One-handers	63	Deprived	4	0.513115
AD_CA20	One-handers	63	Deprived	5	0.779092
AD_CA20	One-handers	63	Deprived	6	0.759248
AD_CA21	One-handers	46	Deprived	1	0.253057
AD_CA21	One-handers	46	Deprived	2	0.366091
AD_CA21	One-handers	46	Deprived	3	0.495727
AD_CA21	One-handers	46	Deprived	4	0.22671
AD_CA21	One-handers	46	Deprived	5	0.545914
AD_CA21	One-handers	46	Deprived	6	0.459098
AD_CT01	Controls	40	Intact	1	0.270297
AD_CT01	Controls	40	Intact	2	0.856063
AD_CT01	Controls	40	Intact	3	0.976864
AD_CT01	Controls	40	Intact	4	0.67934
AD_CT01	Controls	40	Intact	5	0.963826
AD_CT01	Controls	40	Intact	6	0.800174
AD_CT02	Controls	36	Intact	1	0.282211
AD_CT02	Controls	36	Intact	2	1.13388
AD_CT02	Controls	36	Intact	3	0.89442
AD_CT02	Controls	36	Intact	4	1.10078
AD_CT02	Controls	36	Intact	5	0.840765
AD_CT02	Controls	36	Intact	6	1.10859
AD_CT03	Controls	26	Intact	1	0.201611
AD_CT03	Controls	26	Intact	2	0.542829
AD_CT03	Controls	26	Intact	3	0.543495
AD_CT03	Controls	26	Intact	4	0.435311
AD_CT03	Controls	26	Intact	5	0.505903
AD_CT03	Controls	26	Intact	6	0.506724
AD_CT04	Controls	35	Intact	1	0.262201
AD_CT04	Controls	35	Intact	2	0.760776
AD_CT04	Controls	35	Intact	3	0.715216
AD_CT04	Controls	35	Intact	4	0.602096
AD_CT04	Controls	35	Intact	5	0.708349
AD_CT04	Controls	35	Intact	6	0.785211
AD_CT05	Controls	55	Intact	1	0.271591
AD_CT05	Controls	55	Intact	2	0.688708
AD_CT05	Controls	55	Intact	3	0.722891
AD_CT05	Controls	55	Intact	4	0.512748
AD_CT05	Controls	55	Intact	5	0.802266
AD_CT05	Controls	55	Intact	6	0.912408
AD_CT06	Controls	33	Intact	1	0.190305
AD_CT06	Controls	33	Intact	2	0.794419
AD_CT06	Controls	33	Intact	3	0.723609
AD_CT06	Controls	33	Intact	4	0.651051
AD_CT06	Controls	33	Intact	5	0.739212
AD_CT06	Controls	33	Intact	6	0.97662
AD_CT07	Controls	46	Intact	1	0.433073
AD_CT07	Controls	46	Intact	2	0.659639
AD_CT07	Controls	46	Intact	3	0.516989
AD_CT07	Controls	46	Intact	4	0.476092
AD_CT07	Controls	46	Intact	5	0.726147
AD_CT07	Controls	46	Intact	6	0.709719
AD_CT08	Controls	48	Intact	1	0.117396
AD_CT08	Controls	48	Intact	2	0.871674
AD_CT08	Controls	48	Intact	3	0.771126
AD_CT08	Controls	48	Intact	4	0.771143
AD_CT08	Controls	48	Intact	5	0.788499
AD_CT08	Controls	48	Intact	6	1.17075
AD_CT09	Controls	45	Intact	1	0.232366
AD_CT09	Controls	45	Intact	2	0.673809
AD_CT09	Controls	45	Intact	3	0.568018
AD_CT09	Controls	45	Intact	4	0.559871
AD_CT09	Controls	45	Intact	5	0.561409
AD_CT09	Controls	45	Intact	6	0.781971
AD_CT10	Controls	36	Intact	1	0.337238
AD_CT10	Controls	36	Intact	2	0.784617
AD_CT10	Controls	36	Intact	3	0.934834
AD_CT10	Controls	36	Intact	4	0.785289
AD_CT10	Controls	36	Intact	5	0.910524
AD_CT10	Controls	36	Intact	6	0.829762
AD_CT11	Controls	51	Intact	1	0.303455
AD_CT11	Controls	51	Intact	2	0.811967
AD_CT11	Controls	51	Intact	3	0.526108
AD_CT11	Controls	51	Intact	4	0.803766
AD_CT11	Controls	51	Intact	5	0.581531
AD_CT11	Controls	51	Intact	6	0.678226
AD_CT12	Controls	43	Intact	1	0.335681
AD_CT12	Controls	43	Intact	2	0.74192
AD_CT12	Controls	43	Intact	3	0.682165
AD_CT12	Controls	43	Intact	4	0.73509
AD_CT12	Controls	43	Intact	5	0.659037
AD_CT12	Controls	43	Intact	6	0.389465
AD_CT13	Controls	61	Intact	1	0.16877
AD_CT13	Controls	61	Intact	2	0.651169
AD_CT13	Controls	61	Intact	3	0.743884
AD_CT13	Controls	61	Intact	4	0.526021
AD_CT13	Controls	61	Intact	5	0.6785
AD_CT13	Controls	61	Intact	6	0.654896
AD_CT14	Controls	53	Intact	1	0.446786
AD_CT14	Controls	53	Intact	2	0.749676
AD_CT14	Controls	53	Intact	3	0.732041
AD_CT14	Controls	53	Intact	4	0.508351
AD_CT14	Controls	53	Intact	5	0.841683
AD_CT14	Controls	53	Intact	6	0.82924
AD_CT15	Controls	60	Intact	1	0.365104
AD_CT15	Controls	60	Intact	2	0.751147
AD_CT15	Controls	60	Intact	3	0.805377
AD_CT15	Controls	60	Intact	4	0.707209
AD_CT15	Controls	60	Intact	5	0.90056
AD_CT15	Controls	60	Intact	6	0.845326
AD_CT16	Controls	45	Intact	1	0.327342
AD_CT16	Controls	45	Intact	2	0.650665
AD_CT16	Controls	45	Intact	3	0.78336
AD_CT16	Controls	45	Intact	4	0.41598
AD_CT16	Controls	45	Intact	5	0.717973
AD_CT16	Controls	45	Intact	6	0.836159
AD_CT17	Controls	56	Intact	1	0.307769
AD_CT17	Controls	56	Intact	2	0.554984
AD_CT17	Controls	56	Intact	3	0.696679
AD_CT17	Controls	56	Intact	4	0.301433
AD_CT17	Controls	56	Intact	5	0.726491
AD_CT17	Controls	56	Intact	6	0.741388
AD_CT18	Controls	49	Intact	1	0.249976
AD_CT18	Controls	49	Intact	2	0.620729
AD_CT18	Controls	49	Intact	3	0.589587
AD_CT18	Controls	49	Intact	4	0.595712
AD_CT18	Controls	49	Intact	5	0.555922
AD_CT18	Controls	49	Intact	6	0.632947
AD_CT19	Controls	41	Intact	1	0.371115
AD_CT19	Controls	41	Intact	2	0.778168
AD_CT19	Controls	41	Intact	3	0.832209
AD_CT19	Controls	41	Intact	4	0.52542
AD_CT19	Controls	41	Intact	5	0.804298
AD_CT19	Controls	41	Intact	6	0.720475
AD_CT20	Controls	41	Intact	1	0.388634
AD_CT20	Controls	41	Intact	2	0.854103
AD_CT20	Controls	41	Intact	3	0.890417
AD_CT20	Controls	41	Intact	4	0.761276
AD_CT20	Controls	41	Intact	5	0.91415
AD_CT20	Controls	41	Intact	6	1.09475
AD_CT21	Controls	42	Intact	1	0.160137
AD_CT21	Controls	42	Intact	2	0.480479
AD_CT21	Controls	42	Intact	3	0.524873
AD_CT21	Controls	42	Intact	4	0.360409
AD_CT21	Controls	42	Intact	5	0.475932
AD_CT21	Controls	42	Intact	6	0.507835
AD_CT22	Controls	60	Intact	1	0.230376
AD_CT22	Controls	60	Intact	2	0.93699
AD_CT22	Controls	60	Intact	3	0.837714
AD_CT22	Controls	60	Intact	4	0.787109
AD_CT22	Controls	60	Intact	5	0.827116
AD_CT22	Controls	60	Intact	6	1.01745
AD_CT01	Controls	40	Deprived	1	0.45613
AD_CT01	Controls	40	Deprived	2	0.789063
AD_CT01	Controls	40	Deprived	3	0.87258
AD_CT01	Controls	40	Deprived	4	0.550678
AD_CT01	Controls	40	Deprived	5	0.932003
AD_CT01	Controls	40	Deprived	6	0.86255
AD_CT02	Controls	36	Deprived	1	0.35805
AD_CT02	Controls	36	Deprived	2	1.50084
AD_CT02	Controls	36	Deprived	3	0.901187
AD_CT02	Controls	36	Deprived	4	1.48424
AD_CT02	Controls	36	Deprived	5	0.891415
AD_CT02	Controls	36	Deprived	6	1.34882
AD_CT03	Controls	26	Deprived	1	0.215071
AD_CT03	Controls	26	Deprived	2	0.533514
AD_CT03	Controls	26	Deprived	3	0.513218
AD_CT03	Controls	26	Deprived	4	0.419929
AD_CT03	Controls	26	Deprived	5	0.469694
AD_CT03	Controls	26	Deprived	6	0.426616
AD_CT04	Controls	35	Deprived	1	0.242065
AD_CT04	Controls	35	Deprived	2	0.680081
AD_CT04	Controls	35	Deprived	3	0.779116
AD_CT04	Controls	35	Deprived	4	0.621748
AD_CT04	Controls	35	Deprived	5	0.675113
AD_CT04	Controls	35	Deprived	6	0.654049
AD_CT05	Controls	55	Deprived	1	0.281217
AD_CT05	Controls	55	Deprived	2	0.670212
AD_CT05	Controls	55	Deprived	3	0.793429
AD_CT05	Controls	55	Deprived	4	0.48805
AD_CT05	Controls	55	Deprived	5	0.816401
AD_CT05	Controls	55	Deprived	6	0.870592
AD_CT06	Controls	33	Deprived	1	0.206766
AD_CT06	Controls	33	Deprived	2	0.717196
AD_CT06	Controls	33	Deprived	3	0.726106
AD_CT06	Controls	33	Deprived	4	0.645084
AD_CT06	Controls	33	Deprived	5	0.744592
AD_CT06	Controls	33	Deprived	6	0.889548
AD_CT07	Controls	46	Deprived	1	0.467174
AD_CT07	Controls	46	Deprived	2	0.597042
AD_CT07	Controls	46	Deprived	3	0.497632
AD_CT07	Controls	46	Deprived	4	0.384845
AD_CT07	Controls	46	Deprived	5	0.657013
AD_CT07	Controls	46	Deprived	6	0.722628
AD_CT08	Controls	48	Deprived	1	-0.0769209
AD_CT08	Controls	48	Deprived	2	0.797158
AD_CT08	Controls	48	Deprived	3	0.888896
AD_CT08	Controls	48	Deprived	4	0.727154
AD_CT08	Controls	48	Deprived	5	0.930015
AD_CT08	Controls	48	Deprived	6	1.14616
AD_CT09	Controls	45	Deprived	1	0.173392
AD_CT09	Controls	45	Deprived	2	0.677125
AD_CT09	Controls	45	Deprived	3	0.541815
AD_CT09	Controls	45	Deprived	4	0.531013
AD_CT09	Controls	45	Deprived	5	0.48085
AD_CT09	Controls	45	Deprived	6	0.666247
AD_CT10	Controls	36	Deprived	1	0.303034
AD_CT10	Controls	36	Deprived	2	0.78217
AD_CT10	Controls	36	Deprived	3	0.935413
AD_CT10	Controls	36	Deprived	4	0.656544
AD_CT10	Controls	36	Deprived	5	0.867632
AD_CT10	Controls	36	Deprived	6	0.813495
AD_CT11	Controls	51	Deprived	1	0.347722
AD_CT11	Controls	51	Deprived	2	0.744426
AD_CT11	Controls	51	Deprived	3	0.662941
AD_CT11	Controls	51	Deprived	4	0.706593
AD_CT11	Controls	51	Deprived	5	0.773389
AD_CT11	Controls	51	Deprived	6	0.864769
AD_CT12	Controls	43	Deprived	1	0.253945
AD_CT12	Controls	43	Deprived	2	0.775155
AD_CT12	Controls	43	Deprived	3	0.90482
AD_CT12	Controls	43	Deprived	4	0.734426
AD_CT12	Controls	43	Deprived	5	0.844698
AD_CT12	Controls	43	Deprived	6	0.599295
AD_CT13	Controls	61	Deprived	1	0.240672
AD_CT13	Controls	61	Deprived	2	0.595391
AD_CT13	Controls	61	Deprived	3	0.818044
AD_CT13	Controls	61	Deprived	4	0.472433
AD_CT13	Controls	61	Deprived	5	0.890253
AD_CT13	Controls	61	Deprived	6	0.83005
AD_CT14	Controls	53	Deprived	1	0.436356
AD_CT14	Controls	53	Deprived	2	0.732796
AD_CT14	Controls	53	Deprived	3	0.758636
AD_CT14	Controls	53	Deprived	4	0.429146
AD_CT14	Controls	53	Deprived	5	0.820919
AD_CT14	Controls	53	Deprived	6	0.864355
AD_CT15	Controls	60	Deprived	1	0.449499
AD_CT15	Controls	60	Deprived	2	0.65459
AD_CT15	Controls	60	Deprived	3	0.707506
AD_CT15	Controls	60	Deprived	4	0.561184
AD_CT15	Controls	60	Deprived	5	0.813766
AD_CT15	Controls	60	Deprived	6	0.652301
AD_CT16	Controls	45	Deprived	1	0.323028
AD_CT16	Controls	45	Deprived	2	0.630635
AD_CT16	Controls	45	Deprived	3	0.703502
AD_CT16	Controls	45	Deprived	4	0.420792
AD_CT16	Controls	45	Deprived	5	0.651273
AD_CT16	Controls	45	Deprived	6	0.70261
AD_CT17	Controls	56	Deprived	1	0.3592
AD_CT17	Controls	56	Deprived	2	0.62394
AD_CT17	Controls	56	Deprived	3	0.701709
AD_CT17	Controls	56	Deprived	4	0.444291
AD_CT17	Controls	56	Deprived	5	0.762276
AD_CT17	Controls	56	Deprived	6	0.776184
AD_CT18	Controls	49	Deprived	1	0.23476
AD_CT18	Controls	49	Deprived	2	0.588883
AD_CT18	Controls	49	Deprived	3	0.619921
AD_CT18	Controls	49	Deprived	4	0.563679
AD_CT18	Controls	49	Deprived	5	0.611062
AD_CT18	Controls	49	Deprived	6	0.499795
AD_CT19	Controls	41	Deprived	1	0.470779
AD_CT19	Controls	41	Deprived	2	0.914443
AD_CT19	Controls	41	Deprived	3	0.830457
AD_CT19	Controls	41	Deprived	4	0.546005
AD_CT19	Controls	41	Deprived	5	0.712981
AD_CT19	Controls	41	Deprived	6	0.698824
AD_CT20	Controls	41	Deprived	1	0.336969
AD_CT20	Controls	41	Deprived	2	0.748351
AD_CT20	Controls	41	Deprived	3	0.741113
AD_CT20	Controls	41	Deprived	4	0.589104
AD_CT20	Controls	41	Deprived	5	0.822117
AD_CT20	Controls	41	Deprived	6	0.873831
AD_CT21	Controls	42	Deprived	1	0.196565
AD_CT21	Controls	42	Deprived	2	0.563059
AD_CT21	Controls	42	Deprived	3	0.522855
AD_CT21	Controls	42	Deprived	4	0.428396
AD_CT21	Controls	42	Deprived	5	0.452154
AD_CT21	Controls	42	Deprived	6	0.661574
AD_CT22	Controls	60	Deprived	1	0.268311
AD_CT22	Controls	60	Deprived	2	0.896939
AD_CT22	Controls	60	Deprived	3	0.855006
AD_CT22	Controls	60	Deprived	4	0.734723
AD_CT22	Controls	60	Deprived	5	0.849661
AD_CT22	Controls	60	Deprived	6	1.06492
