# Supplementary material for: Complex pattern of facial remapping in somatosensory cortex following congenital but not acquired hand loss
Source: eLife. 2022 Dec 30;11:e76158. doi: 10.7554/eLife.76158 (PMC9851617; doi:10.7554/eLife.76158)
Supplement: Figure 7—source data 4. [file elife-76158-fig7-data4.xlsx]

## Sheet: Fig 7. - source data 4
Figure 7 - Source Data 4. Multivariate distances for face-face pairs in the M1 face region-of-interest for amputees, one-handers and controls.
ID	Group	Age	Hemisphere	FacePairs	FaceROI_Distances
AD_AA01	Amputees	60	Intact	1	0.119359
AD_AA01	Amputees	60	Intact	2	0.451163
AD_AA01	Amputees	60	Intact	3	0.535257
AD_AA01	Amputees	60	Intact	4	0.291377
AD_AA01	Amputees	60	Intact	5	0.584566
AD_AA01	Amputees	60	Intact	6	0.520118
AD_AA01	Amputees	60	Deprived	1	0.285449
AD_AA01	Amputees	60	Deprived	2	0.353751
AD_AA01	Amputees	60	Deprived	3	0.583837
AD_AA01	Amputees	60	Deprived	4	0.302042
AD_AA01	Amputees	60	Deprived	5	0.60666
AD_AA01	Amputees	60	Deprived	6	0.384284
AD_AA02	Amputees	34	Intact	1	0.207763
AD_AA02	Amputees	34	Intact	2	0.626104
AD_AA02	Amputees	34	Intact	3	0.807804
AD_AA02	Amputees	34	Intact	4	0.618258
AD_AA02	Amputees	34	Intact	5	0.877648
AD_AA02	Amputees	34	Intact	6	0.877507
AD_AA02	Amputees	34	Deprived	1	0.0701615
AD_AA02	Amputees	34	Deprived	2	0.548367
AD_AA02	Amputees	34	Deprived	3	0.737356
AD_AA02	Amputees	34	Deprived	4	0.494527
AD_AA02	Amputees	34	Deprived	5	0.746224
AD_AA02	Amputees	34	Deprived	6	0.825037
AD_AA03	Amputees	58	Intact	1	0.291282
AD_AA03	Amputees	58	Intact	2	0.801438
AD_AA03	Amputees	58	Intact	3	1.10395
AD_AA03	Amputees	58	Intact	4	0.605263
AD_AA03	Amputees	58	Intact	5	0.984161
AD_AA03	Amputees	58	Intact	6	0.799201
AD_AA03	Amputees	58	Deprived	1	0.34277
AD_AA03	Amputees	58	Deprived	2	0.794972
AD_AA03	Amputees	58	Deprived	3	1.04521
AD_AA03	Amputees	58	Deprived	4	0.606998
AD_AA03	Amputees	58	Deprived	5	0.932858
AD_AA03	Amputees	58	Deprived	6	0.737247
AD_AA04	Amputees	59	Intact	1	0.329761
AD_AA04	Amputees	59	Intact	2	0.636057
AD_AA04	Amputees	59	Intact	3	0.941736
AD_AA04	Amputees	59	Intact	4	0.463569
AD_AA04	Amputees	59	Intact	5	0.826559
AD_AA04	Amputees	59	Intact	6	0.830459
AD_AA04	Amputees	59	Deprived	1	0.45836
AD_AA04	Amputees	59	Deprived	2	0.792839
AD_AA04	Amputees	59	Deprived	3	0.860995
AD_AA04	Amputees	59	Deprived	4	0.480727
AD_AA04	Amputees	59	Deprived	5	0.888777
AD_AA04	Amputees	59	Deprived	6	0.866657
AD_AA05	Amputees	54	Intact	1	0.150991
AD_AA05	Amputees	54	Intact	2	0.41343
AD_AA05	Amputees	54	Intact	3	0.515666
AD_AA05	Amputees	54	Intact	4	0.351456
AD_AA05	Amputees	54	Intact	5	0.474343
AD_AA05	Amputees	54	Intact	6	0.533819
AD_AA05	Amputees	54	Deprived	1	0.267973
AD_AA05	Amputees	54	Deprived	2	0.916524
AD_AA05	Amputees	54	Deprived	3	0.646515
AD_AA05	Amputees	54	Deprived	4	0.708387
AD_AA05	Amputees	54	Deprived	5	0.648908
AD_AA05	Amputees	54	Deprived	6	0.810074
AD_AA06	Amputees	47	Intact	1	0.361322
AD_AA06	Amputees	47	Intact	2	0.790024
AD_AA06	Amputees	47	Intact	3	0.800692
AD_AA06	Amputees	47	Intact	4	0.714334
AD_AA06	Amputees	47	Intact	5	0.735423
AD_AA06	Amputees	47	Intact	6	0.665866
AD_AA06	Amputees	47	Deprived	1	0.493571
AD_AA06	Amputees	47	Deprived	2	0.801482
AD_AA06	Amputees	47	Deprived	3	0.767899
AD_AA06	Amputees	47	Deprived	4	0.858293
AD_AA06	Amputees	47	Deprived	5	0.806857
AD_AA06	Amputees	47	Deprived	6	0.687998
AD_AA08	Amputees	40	Intact	1	0.144629
AD_AA08	Amputees	40	Intact	2	0.323656
AD_AA08	Amputees	40	Intact	3	0.61291
AD_AA08	Amputees	40	Intact	4	0.212781
AD_AA08	Amputees	40	Intact	5	0.644831
AD_AA08	Amputees	40	Intact	6	0.659179
AD_AA08	Amputees	40	Deprived	1	0.264172
AD_AA08	Amputees	40	Deprived	2	0.565228
AD_AA08	Amputees	40	Deprived	3	1.00004
AD_AA08	Amputees	40	Deprived	4	0.42488
AD_AA08	Amputees	40	Deprived	5	1.09863
AD_AA08	Amputees	40	Deprived	6	1.13468
AD_AA09	Amputees	47	Intact	1	0.236499
AD_AA09	Amputees	47	Intact	2	0.689381
AD_AA09	Amputees	47	Intact	3	0.332472
AD_AA09	Amputees	47	Intact	4	0.470868
AD_AA09	Amputees	47	Intact	5	0.43818
AD_AA09	Amputees	47	Intact	6	0.778817
AD_AA09	Amputees	47	Deprived	1	0.121217
AD_AA09	Amputees	47	Deprived	2	0.505207
AD_AA09	Amputees	47	Deprived	3	0.355869
AD_AA09	Amputees	47	Deprived	4	0.416964
AD_AA09	Amputees	47	Deprived	5	0.337195
AD_AA09	Amputees	47	Deprived	6	0.522518
AD_AA10	Amputees	53	Intact	1	0.0641501
AD_AA10	Amputees	53	Intact	2	0.631454
AD_AA10	Amputees	53	Intact	3	0.78455
AD_AA10	Amputees	53	Intact	4	0.570774
AD_AA10	Amputees	53	Intact	5	0.793794
AD_AA10	Amputees	53	Intact	6	0.54857
AD_AA10	Amputees	53	Deprived	1	0.205964
AD_AA10	Amputees	53	Deprived	2	0.738925
AD_AA10	Amputees	53	Deprived	3	0.80889
AD_AA10	Amputees	53	Deprived	4	0.650105
AD_AA10	Amputees	53	Deprived	5	0.6874
AD_AA10	Amputees	53	Deprived	6	0.58911
AD_AA11	Amputees	56	Intact	1	0.136068
AD_AA11	Amputees	56	Intact	2	0.502978
AD_AA11	Amputees	56	Intact	3	0.780638
AD_AA11	Amputees	56	Intact	4	0.424878
AD_AA11	Amputees	56	Intact	5	0.730724
AD_AA11	Amputees	56	Intact	6	0.605426
AD_AA11	Amputees	56	Deprived	1	0.205838
AD_AA11	Amputees	56	Deprived	2	0.573365
AD_AA11	Amputees	56	Deprived	3	0.743089
AD_AA11	Amputees	56	Deprived	4	0.405986
AD_AA11	Amputees	56	Deprived	5	0.690752
AD_AA11	Amputees	56	Deprived	6	0.627828
AD_AA12	Amputees	66	Intact	1	0.398105
AD_AA12	Amputees	66	Intact	2	0.88509
AD_AA12	Amputees	66	Intact	3	1.01184
AD_AA12	Amputees	66	Intact	4	0.608879
AD_AA12	Amputees	66	Intact	5	0.959348
AD_AA12	Amputees	66	Intact	6	0.973382
AD_AA12	Amputees	66	Deprived	1	0.312769
AD_AA12	Amputees	66	Deprived	2	0.777525
AD_AA12	Amputees	66	Deprived	3	0.972739
AD_AA12	Amputees	66	Deprived	4	0.585591
AD_AA12	Amputees	66	Deprived	5	0.932978
AD_AA12	Amputees	66	Deprived	6	1.04315
AD_AA13	Amputees	65	Intact	1	0.144935
AD_AA13	Amputees	65	Intact	2	0.436921
AD_AA13	Amputees	65	Intact	3	0.63345
AD_AA13	Amputees	65	Intact	4	0.428457
AD_AA13	Amputees	65	Intact	5	0.621601
AD_AA13	Amputees	65	Intact	6	0.392625
AD_AA13	Amputees	65	Deprived	1	0.199487
AD_AA13	Amputees	65	Deprived	2	0.570037
AD_AA13	Amputees	65	Deprived	3	0.739588
AD_AA13	Amputees	65	Deprived	4	0.593014
AD_AA13	Amputees	65	Deprived	5	0.782556
AD_AA13	Amputees	65	Deprived	6	0.393402
AD_AA14	Amputees	66	Intact	1	0.275013
AD_AA14	Amputees	66	Intact	2	0.544637
AD_AA14	Amputees	66	Intact	3	0.579623
AD_AA14	Amputees	66	Intact	4	0.380661
AD_AA14	Amputees	66	Intact	5	0.518748
AD_AA14	Amputees	66	Intact	6	0.490419
AD_AA14	Amputees	66	Deprived	1	0.295334
AD_AA14	Amputees	66	Deprived	2	0.842066
AD_AA14	Amputees	66	Deprived	3	0.66043
AD_AA14	Amputees	66	Deprived	4	0.603663
AD_AA14	Amputees	66	Deprived	5	0.505038
AD_AA14	Amputees	66	Deprived	6	0.568413
AD_AA16	Amputees	64	Intact	1	0.408665
AD_AA16	Amputees	64	Intact	2	0.713474
AD_AA16	Amputees	64	Intact	3	0.697939
AD_AA16	Amputees	64	Intact	4	0.337205
AD_AA16	Amputees	64	Intact	5	0.356688
AD_AA16	Amputees	64	Intact	6	0.241514
AD_AA16	Amputees	64	Deprived	1	0.422539
AD_AA16	Amputees	64	Deprived	2	0.62537
AD_AA16	Amputees	64	Deprived	3	0.602029
AD_AA16	Amputees	64	Deprived	4	0.38909
AD_AA16	Amputees	64	Deprived	5	0.295559
AD_AA16	Amputees	64	Deprived	6	0.250116
AD_AA17	Amputees	65	Intact	1	0.216181
AD_AA17	Amputees	65	Intact	2	0.706275
AD_AA17	Amputees	65	Intact	3	0.62399
AD_AA17	Amputees	65	Intact	4	0.545929
AD_AA17	Amputees	65	Intact	5	0.504867
AD_AA17	Amputees	65	Intact	6	0.487674
AD_AA17	Amputees	65	Deprived	1	0.17241
AD_AA17	Amputees	65	Deprived	2	0.688494
AD_AA17	Amputees	65	Deprived	3	0.589813
AD_AA17	Amputees	65	Deprived	4	0.539016
AD_AA17	Amputees	65	Deprived	5	0.593931
AD_AA17	Amputees	65	Deprived	6	0.588186
AD_AA18	Amputees	48	Intact	1	0.237728
AD_AA18	Amputees	48	Intact	2	0.705962
AD_AA18	Amputees	48	Intact	3	0.523119
AD_AA18	Amputees	48	Intact	4	0.594966
AD_AA18	Amputees	48	Intact	5	0.428556
AD_AA18	Amputees	48	Intact	6	0.616955
AD_AA18	Amputees	48	Deprived	1	0.270065
AD_AA18	Amputees	48	Deprived	2	0.762085
AD_AA18	Amputees	48	Deprived	3	0.586618
AD_AA18	Amputees	48	Deprived	4	0.718665
AD_AA18	Amputees	48	Deprived	5	0.578865
AD_AA18	Amputees	48	Deprived	6	0.713193
AD_AA19	Amputees	31	Intact	1	-0.147166
AD_AA19	Amputees	31	Intact	2	0.610111
AD_AA19	Amputees	31	Intact	3	0.88651
AD_AA19	Amputees	31	Intact	4	0.644087
AD_AA19	Amputees	31	Intact	5	0.90539
AD_AA19	Amputees	31	Intact	6	1.07142
AD_AA19	Amputees	31	Deprived	1	-0.050988
AD_AA19	Amputees	31	Deprived	2	0.50728
AD_AA19	Amputees	31	Deprived	3	0.785298
AD_AA19	Amputees	31	Deprived	4	0.517927
AD_AA19	Amputees	31	Deprived	5	0.789079
AD_AA19	Amputees	31	Deprived	6	0.867028
AD_CA01	One-handers	32	Intact	1	0.149686
AD_CA01	One-handers	32	Intact	2	0.574221
AD_CA01	One-handers	32	Intact	3	0.88112
AD_CA01	One-handers	32	Intact	4	0.444439
AD_CA01	One-handers	32	Intact	5	0.755333
AD_CA01	One-handers	32	Intact	6	0.843821
AD_CA01	One-handers	32	Deprived	1	0.184436
AD_CA01	One-handers	32	Deprived	2	0.392373
AD_CA01	One-handers	32	Deprived	3	0.697202
AD_CA01	One-handers	32	Deprived	4	0.327124
AD_CA01	One-handers	32	Deprived	5	0.659446
AD_CA01	One-handers	32	Deprived	6	0.761046
AD_CA02	One-handers	32	Intact	1	0.302194
AD_CA02	One-handers	32	Intact	2	0.555175
AD_CA02	One-handers	32	Intact	3	0.539513
AD_CA02	One-handers	32	Intact	4	0.482875
AD_CA02	One-handers	32	Intact	5	0.479107
AD_CA02	One-handers	32	Intact	6	0.715516
AD_CA02	One-handers	32	Deprived	1	0.134168
AD_CA02	One-handers	32	Deprived	2	0.380237
AD_CA02	One-handers	32	Deprived	3	0.721725
AD_CA02	One-handers	32	Deprived	4	0.324337
AD_CA02	One-handers	32	Deprived	5	0.660473
AD_CA02	One-handers	32	Deprived	6	0.687282
AD_CA03	One-handers	35	Intact	1	0.219013
AD_CA03	One-handers	35	Intact	2	0.709901
AD_CA03	One-handers	35	Intact	3	0.748521
AD_CA03	One-handers	35	Intact	4	0.75359
AD_CA03	One-handers	35	Intact	5	0.643275
AD_CA03	One-handers	35	Intact	6	0.944189
AD_CA03	One-handers	35	Deprived	1	0.309731
AD_CA03	One-handers	35	Deprived	2	0.512214
AD_CA03	One-handers	35	Deprived	3	0.695745
AD_CA03	One-handers	35	Deprived	4	0.479832
AD_CA03	One-handers	35	Deprived	5	0.637465
AD_CA03	One-handers	35	Deprived	6	0.632348
AD_CA04	One-handers	48	Intact	1	-0.0838022
AD_CA04	One-handers	48	Intact	2	0.874503
AD_CA04	One-handers	48	Intact	3	0.948116
AD_CA04	One-handers	48	Intact	4	0.870496
AD_CA04	One-handers	48	Intact	5	0.975936
AD_CA04	One-handers	48	Intact	6	0.995946
AD_CA04	One-handers	48	Deprived	1	0.140888
AD_CA04	One-handers	48	Deprived	2	0.553337
AD_CA04	One-handers	48	Deprived	3	0.777873
AD_CA04	One-handers	48	Deprived	4	0.599338
AD_CA04	One-handers	48	Deprived	5	0.831648
AD_CA04	One-handers	48	Deprived	6	0.731169
AD_CA05	One-handers	22	Intact	1	0.318761
AD_CA05	One-handers	22	Intact	2	0.373007
AD_CA05	One-handers	22	Intact	3	0.538228
AD_CA05	One-handers	22	Intact	4	0.410146
AD_CA05	One-handers	22	Intact	5	0.577982
AD_CA05	One-handers	22	Intact	6	0.57959
AD_CA05	One-handers	22	Deprived	1	0.462339
AD_CA05	One-handers	22	Deprived	2	0.590693
AD_CA05	One-handers	22	Deprived	3	0.590397
AD_CA05	One-handers	22	Deprived	4	0.494366
AD_CA05	One-handers	22	Deprived	5	0.66065
AD_CA05	One-handers	22	Deprived	6	0.669724
AD_CA06	One-handers	54	Intact	1	0.223903
AD_CA06	One-handers	54	Intact	2	0.633752
AD_CA06	One-handers	54	Intact	3	0.837688
AD_CA06	One-handers	54	Intact	4	0.606596
AD_CA06	One-handers	54	Intact	5	0.840317
AD_CA06	One-handers	54	Intact	6	0.680584
AD_CA06	One-handers	54	Deprived	1	0.205336
AD_CA06	One-handers	54	Deprived	2	0.640615
AD_CA06	One-handers	54	Deprived	3	0.741055
AD_CA06	One-handers	54	Deprived	4	0.617573
AD_CA06	One-handers	54	Deprived	5	0.722841
AD_CA06	One-handers	54	Deprived	6	0.722504
AD_CA07	One-handers	56	Intact	1	0.274325
AD_CA07	One-handers	56	Intact	2	0.723607
AD_CA07	One-handers	56	Intact	3	0.735714
AD_CA07	One-handers	56	Intact	4	0.589521
AD_CA07	One-handers	56	Intact	5	0.669534
AD_CA07	One-handers	56	Intact	6	0.749681
AD_CA07	One-handers	56	Deprived	1	0.200901
AD_CA07	One-handers	56	Deprived	2	0.686112
AD_CA07	One-handers	56	Deprived	3	0.527972
AD_CA07	One-handers	56	Deprived	4	0.578991
AD_CA07	One-handers	56	Deprived	5	0.611167
AD_CA07	One-handers	56	Deprived	6	0.677028
AD_CA08	One-handers	53	Intact	1	0.187574
AD_CA08	One-handers	53	Intact	2	0.686733
AD_CA08	One-handers	53	Intact	3	0.696764
AD_CA08	One-handers	53	Intact	4	0.559796
AD_CA08	One-handers	53	Intact	5	0.617018
AD_CA08	One-handers	53	Intact	6	0.668958
AD_CA08	One-handers	53	Deprived	1	0.173597
AD_CA08	One-handers	53	Deprived	2	0.626544
AD_CA08	One-handers	53	Deprived	3	0.492829
AD_CA08	One-handers	53	Deprived	4	0.515371
AD_CA08	One-handers	53	Deprived	5	0.407678
AD_CA08	One-handers	53	Deprived	6	0.290453
AD_CA09	One-handers	54	Intact	1	0.16911
AD_CA09	One-handers	54	Intact	2	0.343104
AD_CA09	One-handers	54	Intact	3	0.667631
AD_CA09	One-handers	54	Intact	4	0.203683
AD_CA09	One-handers	54	Intact	5	0.6713
AD_CA09	One-handers	54	Intact	6	0.65516
AD_CA09	One-handers	54	Deprived	1	0.118877
AD_CA09	One-handers	54	Deprived	2	0.434893
AD_CA09	One-handers	54	Deprived	3	0.923936
AD_CA09	One-handers	54	Deprived	4	0.363737
AD_CA09	One-handers	54	Deprived	5	0.932847
AD_CA09	One-handers	54	Deprived	6	0.951147
AD_CA10	One-handers	58	Intact	1	-0.0853343
AD_CA10	One-handers	58	Intact	2	0.429119
AD_CA10	One-handers	58	Intact	3	0.677899
AD_CA10	One-handers	58	Intact	4	0.408819
AD_CA10	One-handers	58	Intact	5	0.591081
AD_CA10	One-handers	58	Intact	6	0.504468
AD_CA10	One-handers	58	Deprived	1	-0.06567
AD_CA10	One-handers	58	Deprived	2	0.483565
AD_CA10	One-handers	58	Deprived	3	0.715808
AD_CA10	One-handers	58	Deprived	4	0.403728
AD_CA10	One-handers	58	Deprived	5	0.682427
AD_CA10	One-handers	58	Deprived	6	0.466748
AD_CA11	One-handers	22	Intact	1	0.24336
AD_CA11	One-handers	22	Intact	2	0.490724
AD_CA11	One-handers	22	Intact	3	0.655966
AD_CA11	One-handers	22	Intact	4	0.409788
AD_CA11	One-handers	22	Intact	5	0.644435
AD_CA11	One-handers	22	Intact	6	0.638723
AD_CA11	One-handers	22	Deprived	1	0.0856443
AD_CA11	One-handers	22	Deprived	2	0.321895
AD_CA11	One-handers	22	Deprived	3	0.624361
AD_CA11	One-handers	22	Deprived	4	0.343295
AD_CA11	One-handers	22	Deprived	5	0.672448
AD_CA11	One-handers	22	Deprived	6	0.512822
AD_CA12	One-handers	30	Intact	1	0.107033
AD_CA12	One-handers	30	Intact	2	0.451597
AD_CA12	One-handers	30	Intact	3	0.886944
AD_CA12	One-handers	30	Intact	4	0.409812
AD_CA12	One-handers	30	Intact	5	0.925606
AD_CA12	One-handers	30	Intact	6	0.917355
AD_CA12	One-handers	30	Deprived	1	0.110283
AD_CA12	One-handers	30	Deprived	2	0.613201
AD_CA12	One-handers	30	Deprived	3	0.921171
AD_CA12	One-handers	30	Deprived	4	0.504779
AD_CA12	One-handers	30	Deprived	5	0.916262
AD_CA12	One-handers	30	Deprived	6	0.869592
AD_CA13	One-handers	24	Intact	1	0.354307
AD_CA13	One-handers	24	Intact	2	0.717516
AD_CA13	One-handers	24	Intact	3	0.801105
AD_CA13	One-handers	24	Intact	4	0.563041
AD_CA13	One-handers	24	Intact	5	0.781073
AD_CA13	One-handers	24	Intact	6	0.732076
AD_CA13	One-handers	24	Deprived	1	0.224197
AD_CA13	One-handers	24	Deprived	2	0.481438
AD_CA13	One-handers	24	Deprived	3	0.664851
AD_CA13	One-handers	24	Deprived	4	0.366275
AD_CA13	One-handers	24	Deprived	5	0.774848
AD_CA13	One-handers	24	Deprived	6	0.702914
AD_CA14	One-handers	33	Intact	1	-0.167329
AD_CA14	One-handers	33	Intact	2	0.439158
AD_CA14	One-handers	33	Intact	3	0.5147
AD_CA14	One-handers	33	Intact	4	0.424538
AD_CA14	One-handers	33	Intact	5	0.493174
AD_CA14	One-handers	33	Intact	6	0.386781
AD_CA14	One-handers	33	Deprived	1	0.154814
AD_CA14	One-handers	33	Deprived	2	0.430801
AD_CA14	One-handers	33	Deprived	3	0.53211
AD_CA14	One-handers	33	Deprived	4	0.48552
AD_CA14	One-handers	33	Deprived	5	0.677935
AD_CA14	One-handers	33	Deprived	6	0.523159
AD_CA15	One-handers	39	Intact	1	0.274365
AD_CA15	One-handers	39	Intact	2	0.378646
AD_CA15	One-handers	39	Intact	3	0.608057
AD_CA15	One-handers	39	Intact	4	0.480987
AD_CA15	One-handers	39	Intact	5	0.429102
AD_CA15	One-handers	39	Intact	6	0.716143
AD_CA15	One-handers	39	Deprived	1	0.163843
AD_CA15	One-handers	39	Deprived	2	0.362278
AD_CA15	One-handers	39	Deprived	3	0.543267
AD_CA15	One-handers	39	Deprived	4	0.383362
AD_CA15	One-handers	39	Deprived	5	0.432188
AD_CA15	One-handers	39	Deprived	6	0.657369
AD_CA16	One-handers	55	Intact	1	0.0521278
AD_CA16	One-handers	55	Intact	2	0.45741
AD_CA16	One-handers	55	Intact	3	0.567297
AD_CA16	One-handers	55	Intact	4	0.37522
AD_CA16	One-handers	55	Intact	5	0.526515
AD_CA16	One-handers	55	Intact	6	0.502368
AD_CA16	One-handers	55	Deprived	1	0.206638
AD_CA16	One-handers	55	Deprived	2	0.458356
AD_CA16	One-handers	55	Deprived	3	0.526295
AD_CA16	One-handers	55	Deprived	4	0.380081
AD_CA16	One-handers	55	Deprived	5	0.418666
AD_CA16	One-handers	55	Deprived	6	0.419432
AD_CA17	One-handers	67	Intact	1	0.285624
AD_CA17	One-handers	67	Intact	2	0.734486
AD_CA17	One-handers	67	Intact	3	0.787123
AD_CA17	One-handers	67	Intact	4	0.576462
AD_CA17	One-handers	67	Intact	5	0.649448
AD_CA17	One-handers	67	Intact	6	0.658378
AD_CA17	One-handers	67	Deprived	1	0.116762
AD_CA17	One-handers	67	Deprived	2	0.4174
AD_CA17	One-handers	67	Deprived	3	0.750915
AD_CA17	One-handers	67	Deprived	4	0.285547
AD_CA17	One-handers	67	Deprived	5	0.724594
AD_CA17	One-handers	67	Deprived	6	0.673191
AD_CA18	One-handers	30	Intact	1	0.320358
AD_CA18	One-handers	30	Intact	2	0.748382
AD_CA18	One-handers	30	Intact	3	0.977136
AD_CA18	One-handers	30	Intact	4	0.626405
AD_CA18	One-handers	30	Intact	5	1.14217
AD_CA18	One-handers	30	Intact	6	1.11806
AD_CA18	One-handers	30	Deprived	1	0.194204
AD_CA18	One-handers	30	Deprived	2	0.567635
AD_CA18	One-handers	30	Deprived	3	0.955766
AD_CA18	One-handers	30	Deprived	4	0.482461
AD_CA18	One-handers	30	Deprived	5	1.03128
AD_CA18	One-handers	30	Deprived	6	0.919835
AD_CA19	One-handers	43	Intact	1	0.327661
AD_CA19	One-handers	43	Intact	2	0.598743
AD_CA19	One-handers	43	Intact	3	0.821676
AD_CA19	One-handers	43	Intact	4	0.33553
AD_CA19	One-handers	43	Intact	5	0.730839
AD_CA19	One-handers	43	Intact	6	0.692268
AD_CA19	One-handers	43	Deprived	1	0.284907
AD_CA19	One-handers	43	Deprived	2	0.837892
AD_CA19	One-handers	43	Deprived	3	0.983723
AD_CA19	One-handers	43	Deprived	4	0.517384
AD_CA19	One-handers	43	Deprived	5	0.874514
AD_CA19	One-handers	43	Deprived	6	0.772648
AD_CA20	One-handers	63	Intact	1	0.381214
AD_CA20	One-handers	63	Intact	2	0.809803
AD_CA20	One-handers	63	Intact	3	0.938056
AD_CA20	One-handers	63	Intact	4	0.579399
AD_CA20	One-handers	63	Intact	5	0.933716
AD_CA20	One-handers	63	Intact	6	0.840749
AD_CA20	One-handers	63	Deprived	1	0.372027
AD_CA20	One-handers	63	Deprived	2	0.579705
AD_CA20	One-handers	63	Deprived	3	0.940075
AD_CA20	One-handers	63	Deprived	4	0.317201
AD_CA20	One-handers	63	Deprived	5	0.884147
AD_CA20	One-handers	63	Deprived	6	0.733881
AD_CA21	One-handers	46	Intact	1	0.217679
AD_CA21	One-handers	46	Intact	2	0.230026
AD_CA21	One-handers	46	Intact	3	0.583108
AD_CA21	One-handers	46	Intact	4	0.0899237
AD_CA21	One-handers	46	Intact	5	0.601388
AD_CA21	One-handers	46	Intact	6	0.480997
AD_CA21	One-handers	46	Deprived	1	0.248581
AD_CA21	One-handers	46	Deprived	2	0.362713
AD_CA21	One-handers	46	Deprived	3	0.528796
AD_CA21	One-handers	46	Deprived	4	0.210104
AD_CA21	One-handers	46	Deprived	5	0.650819
AD_CA21	One-handers	46	Deprived	6	0.590866
AD_CT01	Controls	40	Intact	1	0.499033
AD_CT01	Controls	40	Intact	2	0.840441
AD_CT01	Controls	40	Intact	3	0.903793
AD_CT01	Controls	40	Intact	4	0.640525
AD_CT01	Controls	40	Intact	5	0.963619
AD_CT01	Controls	40	Intact	6	0.828988
AD_CT01	Controls	40	Deprived	1	0.387236
AD_CT01	Controls	40	Deprived	2	0.654647
AD_CT01	Controls	40	Deprived	3	0.786634
AD_CT01	Controls	40	Deprived	4	0.424837
AD_CT01	Controls	40	Deprived	5	0.771632
AD_CT01	Controls	40	Deprived	6	0.557143
AD_CT02	Controls	36	Intact	1	0.191535
AD_CT02	Controls	36	Intact	2	0.554908
AD_CT02	Controls	36	Intact	3	0.671724
AD_CT02	Controls	36	Intact	4	0.492245
AD_CT02	Controls	36	Intact	5	0.650331
AD_CT02	Controls	36	Intact	6	0.610044
AD_CT02	Controls	36	Deprived	1	0.27298
AD_CT02	Controls	36	Deprived	2	0.908981
AD_CT02	Controls	36	Deprived	3	0.754198
AD_CT02	Controls	36	Deprived	4	0.85629
AD_CT02	Controls	36	Deprived	5	0.801117
AD_CT02	Controls	36	Deprived	6	0.798332
AD_CT03	Controls	26	Intact	1	0.0823618
AD_CT03	Controls	26	Intact	2	0.430062
AD_CT03	Controls	26	Intact	3	0.468599
AD_CT03	Controls	26	Intact	4	0.349034
AD_CT03	Controls	26	Intact	5	0.434965
AD_CT03	Controls	26	Intact	6	0.377955
AD_CT03	Controls	26	Deprived	1	0.15626
AD_CT03	Controls	26	Deprived	2	0.300625
AD_CT03	Controls	26	Deprived	3	0.441003
AD_CT03	Controls	26	Deprived	4	0.253858
AD_CT03	Controls	26	Deprived	5	0.379601
AD_CT03	Controls	26	Deprived	6	0.28538
AD_CT04	Controls	35	Intact	1	0.117708
AD_CT04	Controls	35	Intact	2	0.731022
AD_CT04	Controls	35	Intact	3	0.772166
AD_CT04	Controls	35	Intact	4	0.551019
AD_CT04	Controls	35	Intact	5	0.608858
AD_CT04	Controls	35	Intact	6	0.922221
AD_CT04	Controls	35	Deprived	1	0.254321
AD_CT04	Controls	35	Deprived	2	0.662427
AD_CT04	Controls	35	Deprived	3	0.779214
AD_CT04	Controls	35	Deprived	4	0.444733
AD_CT04	Controls	35	Deprived	5	0.590352
AD_CT04	Controls	35	Deprived	6	0.567112
AD_CT05	Controls	55	Intact	1	0.297044
AD_CT05	Controls	55	Intact	2	0.627961
AD_CT05	Controls	55	Intact	3	0.676299
AD_CT05	Controls	55	Intact	4	0.489301
AD_CT05	Controls	55	Intact	5	0.755831
AD_CT05	Controls	55	Intact	6	0.910397
AD_CT05	Controls	55	Deprived	1	0.290008
AD_CT05	Controls	55	Deprived	2	0.739532
AD_CT05	Controls	55	Deprived	3	0.748969
AD_CT05	Controls	55	Deprived	4	0.461232
AD_CT05	Controls	55	Deprived	5	0.660817
AD_CT05	Controls	55	Deprived	6	0.711526
AD_CT06	Controls	33	Intact	1	0.0761638
AD_CT06	Controls	33	Intact	2	0.538742
AD_CT06	Controls	33	Intact	3	0.548288
AD_CT06	Controls	33	Intact	4	0.527219
AD_CT06	Controls	33	Intact	5	0.619002
AD_CT06	Controls	33	Intact	6	0.842007
AD_CT06	Controls	33	Deprived	1	0.159284
AD_CT06	Controls	33	Deprived	2	0.721107
AD_CT06	Controls	33	Deprived	3	0.644784
AD_CT06	Controls	33	Deprived	4	0.633428
AD_CT06	Controls	33	Deprived	5	0.645141
AD_CT06	Controls	33	Deprived	6	0.844149
AD_CT07	Controls	46	Intact	1	0.480967
AD_CT07	Controls	46	Intact	2	0.736261
AD_CT07	Controls	46	Intact	3	0.632138
AD_CT07	Controls	46	Intact	4	0.298668
AD_CT07	Controls	46	Intact	5	0.764016
AD_CT07	Controls	46	Intact	6	0.819331
AD_CT07	Controls	46	Deprived	1	0.461497
AD_CT07	Controls	46	Deprived	2	0.543508
AD_CT07	Controls	46	Deprived	3	0.655611
AD_CT07	Controls	46	Deprived	4	0.304069
AD_CT07	Controls	46	Deprived	5	0.71793
AD_CT07	Controls	46	Deprived	6	0.756565
AD_CT08	Controls	48	Intact	1	0.265607
AD_CT08	Controls	48	Intact	2	0.997068
AD_CT08	Controls	48	Intact	3	0.901453
AD_CT08	Controls	48	Intact	4	0.786261
AD_CT08	Controls	48	Intact	5	0.910051
AD_CT08	Controls	48	Intact	6	1.13324
AD_CT08	Controls	48	Deprived	1	0.12174
AD_CT08	Controls	48	Deprived	2	0.618102
AD_CT08	Controls	48	Deprived	3	0.894653
AD_CT08	Controls	48	Deprived	4	0.501903
AD_CT08	Controls	48	Deprived	5	0.894649
AD_CT08	Controls	48	Deprived	6	0.895408
AD_CT09	Controls	45	Intact	1	0.256247
AD_CT09	Controls	45	Intact	2	0.813381
AD_CT09	Controls	45	Intact	3	0.690076
AD_CT09	Controls	45	Intact	4	0.590997
AD_CT09	Controls	45	Intact	5	0.641086
AD_CT09	Controls	45	Intact	6	0.801931
AD_CT09	Controls	45	Deprived	1	0.273823
AD_CT09	Controls	45	Deprived	2	0.498668
AD_CT09	Controls	45	Deprived	3	0.607896
AD_CT09	Controls	45	Deprived	4	0.376227
AD_CT09	Controls	45	Deprived	5	0.540511
AD_CT09	Controls	45	Deprived	6	0.632289
AD_CT10	Controls	36	Intact	1	0.242543
AD_CT10	Controls	36	Intact	2	0.694904
AD_CT10	Controls	36	Intact	3	0.841151
AD_CT10	Controls	36	Intact	4	0.716347
AD_CT10	Controls	36	Intact	5	0.835099
AD_CT10	Controls	36	Intact	6	0.756366
AD_CT10	Controls	36	Deprived	1	0.288947
AD_CT10	Controls	36	Deprived	2	0.71303
AD_CT10	Controls	36	Deprived	3	0.852361
AD_CT10	Controls	36	Deprived	4	0.58036
AD_CT10	Controls	36	Deprived	5	0.762715
AD_CT10	Controls	36	Deprived	6	0.760805
AD_CT11	Controls	51	Intact	1	0.231488
AD_CT11	Controls	51	Intact	2	0.749036
AD_CT11	Controls	51	Intact	3	0.513326
AD_CT11	Controls	51	Intact	4	0.672054
AD_CT11	Controls	51	Intact	5	0.596311
AD_CT11	Controls	51	Intact	6	0.604832
AD_CT11	Controls	51	Deprived	1	0.345618
AD_CT11	Controls	51	Deprived	2	0.541835
AD_CT11	Controls	51	Deprived	3	0.699414
AD_CT11	Controls	51	Deprived	4	0.628787
AD_CT11	Controls	51	Deprived	5	0.919058
AD_CT11	Controls	51	Deprived	6	0.799909
AD_CT12	Controls	43	Intact	1	0.299085
AD_CT12	Controls	43	Intact	2	0.692494
AD_CT12	Controls	43	Intact	3	0.618913
AD_CT12	Controls	43	Intact	4	0.687187
AD_CT12	Controls	43	Intact	5	0.680562
AD_CT12	Controls	43	Intact	6	0.456761
AD_CT12	Controls	43	Deprived	1	0.226658
AD_CT12	Controls	43	Deprived	2	0.644308
AD_CT12	Controls	43	Deprived	3	0.606521
AD_CT12	Controls	43	Deprived	4	0.632926
AD_CT12	Controls	43	Deprived	5	0.69071
AD_CT12	Controls	43	Deprived	6	0.608822
AD_CT13	Controls	61	Intact	1	0.0917559
AD_CT13	Controls	61	Intact	2	0.506124
AD_CT13	Controls	61	Intact	3	0.485371
AD_CT13	Controls	61	Intact	4	0.464454
AD_CT13	Controls	61	Intact	5	0.485838
AD_CT13	Controls	61	Intact	6	0.4886
AD_CT13	Controls	61	Deprived	1	0.0544751
AD_CT13	Controls	61	Deprived	2	0.489984
AD_CT13	Controls	61	Deprived	3	0.652169
AD_CT13	Controls	61	Deprived	4	0.42598
AD_CT13	Controls	61	Deprived	5	0.672088
AD_CT13	Controls	61	Deprived	6	0.634578
AD_CT14	Controls	53	Intact	1	0.278981
AD_CT14	Controls	53	Intact	2	0.69768
AD_CT14	Controls	53	Intact	3	0.719112
AD_CT14	Controls	53	Intact	4	0.542207
AD_CT14	Controls	53	Intact	5	0.774643
AD_CT14	Controls	53	Intact	6	0.72677
AD_CT14	Controls	53	Deprived	1	0.366711
AD_CT14	Controls	53	Deprived	2	0.747015
AD_CT14	Controls	53	Deprived	3	0.836796
AD_CT14	Controls	53	Deprived	4	0.484422
AD_CT14	Controls	53	Deprived	5	0.821393
AD_CT14	Controls	53	Deprived	6	0.830298
AD_CT15	Controls	60	Intact	1	0.269874
AD_CT15	Controls	60	Intact	2	0.561411
AD_CT15	Controls	60	Intact	3	0.808756
AD_CT15	Controls	60	Intact	4	0.491378
AD_CT15	Controls	60	Intact	5	0.773647
AD_CT15	Controls	60	Intact	6	0.541003
AD_CT15	Controls	60	Deprived	1	0.385607
AD_CT15	Controls	60	Deprived	2	0.645075
AD_CT15	Controls	60	Deprived	3	0.739935
AD_CT15	Controls	60	Deprived	4	0.540451
AD_CT15	Controls	60	Deprived	5	0.777114
AD_CT15	Controls	60	Deprived	6	0.48541
AD_CT16	Controls	45	Intact	1	0.362727
AD_CT16	Controls	45	Intact	2	0.683647
AD_CT16	Controls	45	Intact	3	0.797519
AD_CT16	Controls	45	Intact	4	0.480203
AD_CT16	Controls	45	Intact	5	0.694548
AD_CT16	Controls	45	Intact	6	0.807196
AD_CT16	Controls	45	Deprived	1	0.261488
AD_CT16	Controls	45	Deprived	2	0.414017
AD_CT16	Controls	45	Deprived	3	0.680563
AD_CT16	Controls	45	Deprived	4	0.15768
AD_CT16	Controls	45	Deprived	5	0.500048
AD_CT16	Controls	45	Deprived	6	0.47283
AD_CT17	Controls	56	Intact	1	0.22092
AD_CT17	Controls	56	Intact	2	0.457304
AD_CT17	Controls	56	Intact	3	0.743565
AD_CT17	Controls	56	Intact	4	0.203975
AD_CT17	Controls	56	Intact	5	0.65437
AD_CT17	Controls	56	Intact	6	0.666082
AD_CT17	Controls	56	Deprived	1	0.235401
AD_CT17	Controls	56	Deprived	2	0.417017
AD_CT17	Controls	56	Deprived	3	0.683098
AD_CT17	Controls	56	Deprived	4	0.286713
AD_CT17	Controls	56	Deprived	5	0.652426
AD_CT17	Controls	56	Deprived	6	0.637471
AD_CT18	Controls	49	Intact	1	0.102876
AD_CT18	Controls	49	Intact	2	0.413049
AD_CT18	Controls	49	Intact	3	0.527227
AD_CT18	Controls	49	Intact	4	0.381338
AD_CT18	Controls	49	Intact	5	0.485053
AD_CT18	Controls	49	Intact	6	0.43809
AD_CT18	Controls	49	Deprived	1	0.241477
AD_CT18	Controls	49	Deprived	2	0.677399
AD_CT18	Controls	49	Deprived	3	0.772621
AD_CT18	Controls	49	Deprived	4	0.518451
AD_CT18	Controls	49	Deprived	5	0.640166
AD_CT18	Controls	49	Deprived	6	0.571302
AD_CT19	Controls	41	Intact	1	0.33208
AD_CT19	Controls	41	Intact	2	0.704695
AD_CT19	Controls	41	Intact	3	0.74025
AD_CT19	Controls	41	Intact	4	0.453343
AD_CT19	Controls	41	Intact	5	0.773085
AD_CT19	Controls	41	Intact	6	0.806613
AD_CT19	Controls	41	Deprived	1	0.51584
AD_CT19	Controls	41	Deprived	2	0.953909
AD_CT19	Controls	41	Deprived	3	0.909196
AD_CT19	Controls	41	Deprived	4	0.571153
AD_CT19	Controls	41	Deprived	5	1.03398
AD_CT19	Controls	41	Deprived	6	1.04381
AD_CT20	Controls	41	Intact	1	0.311186
AD_CT20	Controls	41	Intact	2	0.910767
AD_CT20	Controls	41	Intact	3	0.9305
AD_CT20	Controls	41	Intact	4	0.737573
AD_CT20	Controls	41	Intact	5	0.89583
AD_CT20	Controls	41	Intact	6	1.0306
AD_CT20	Controls	41	Deprived	1	0.346596
AD_CT20	Controls	41	Deprived	2	0.799891
AD_CT20	Controls	41	Deprived	3	0.85701
AD_CT20	Controls	41	Deprived	4	0.722532
AD_CT20	Controls	41	Deprived	5	0.957863
AD_CT20	Controls	41	Deprived	6	0.829009
AD_CT21	Controls	42	Intact	1	0.152902
AD_CT21	Controls	42	Intact	2	0.380574
AD_CT21	Controls	42	Intact	3	0.459337
AD_CT21	Controls	42	Intact	4	0.229924
AD_CT21	Controls	42	Intact	5	0.423844
AD_CT21	Controls	42	Intact	6	0.442329
AD_CT21	Controls	42	Deprived	1	-0.0394641
AD_CT21	Controls	42	Deprived	2	0.538438
AD_CT21	Controls	42	Deprived	3	0.446662
AD_CT21	Controls	42	Deprived	4	0.391319
AD_CT21	Controls	42	Deprived	5	0.380688
AD_CT21	Controls	42	Deprived	6	0.631611
AD_CT22	Controls	60	Intact	1	0.168138
AD_CT22	Controls	60	Intact	2	0.871632
AD_CT22	Controls	60	Intact	3	0.959719
AD_CT22	Controls	60	Intact	4	0.69376
AD_CT22	Controls	60	Intact	5	0.92805
AD_CT22	Controls	60	Intact	6	1.12016
AD_CT22	Controls	60	Deprived	1	0.259925
AD_CT22	Controls	60	Deprived	2	0.972204
AD_CT22	Controls	60	Deprived	3	1.04443
AD_CT22	Controls	60	Deprived	4	0.803318
AD_CT22	Controls	60	Deprived	5	1.11287
AD_CT22	Controls	60	Deprived	6	1.3039
