# Supplementary figures and images for: Complex pattern of facial remapping in somatosensory cortex following congenital but not acquired hand loss
Source: eLife journal article supplement (doi:10.7554/elife.76158), 2022-12-30

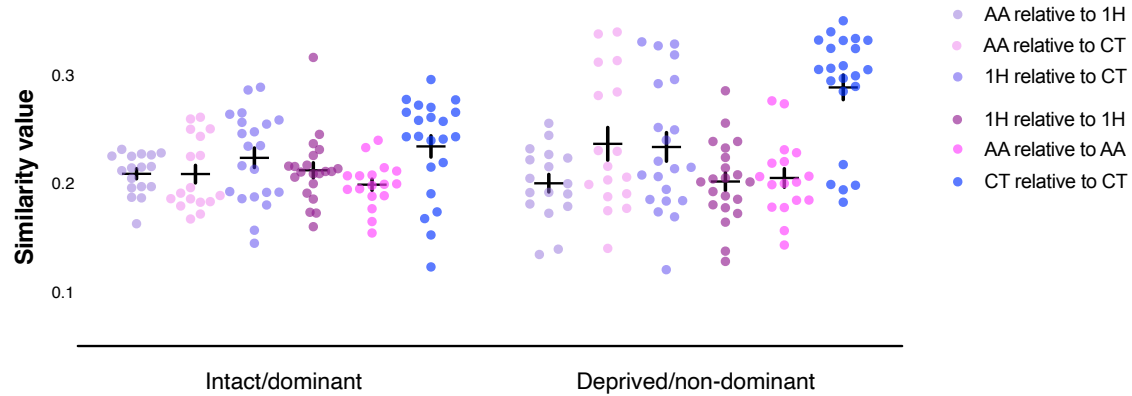

Supplement: supp [file elife-76158-supp-v1.zip]

● Controls relative to one-handers

● Controls relative to amputees

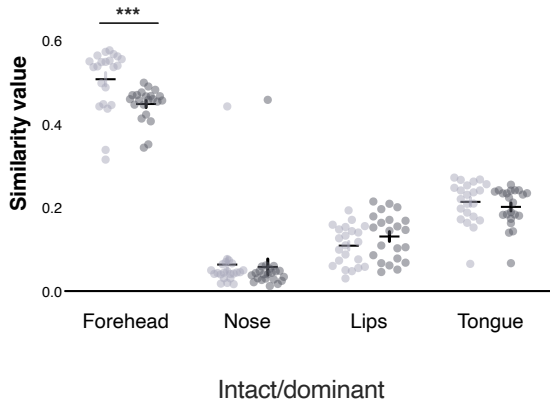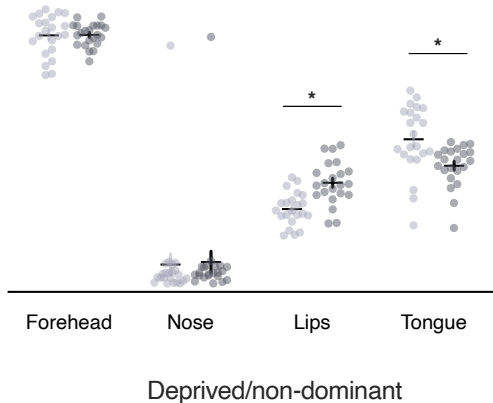

Supplement: supp [file elife-76158-supp-v1.zip]
